# Supplementary material for: Subcellular Imaging of the Entire Protein Coding Human Transcriptome on FFPE Tissue Using Spatial Molecular Imaging
Source: Research Square preprint supplement (doi:10.21203/rs.3.rs-8210178/v1), 2026-02-13
Supplement: Supplementary file 2 [file e21bd5e2c97ed985eac74385.xlsx]

## Sheet: Gene Targets
Display Name	Gene Symbol(s)	Gene Name(s)	Alias(es)
A1BG	A1BG	alpha-1-B glycoprotein	HEL-S-163pA; alpha-1B-glycoprotein; epididymis secretory sperm binding protein Li 163pA
A1CF	A1CF	APOBEC1 complementation factor	APOBEC-1 stimulating protein; APOBEC1 complementation factor; apo-B RNA editing protein; apobec-1 complementation factor (ACF) (ASP)
A2M	A2M	alpha-2-macroglobulin	C3 and PZP-like alpha-2-macroglobulin domain-containing protein 5; alpha-2-M; alpha-2-macroglobulin
A2ML1	A2ML1	alpha-2-macroglobulin like 1	C3 and PZP-like, alpha-2-macroglobulin domain containing 9; alpha-2-macroglobulin-like protein 1
A3GALT2	A3GALT2	alpha 1,3-galactosyltransferase 2	alpha 1,3-galactosyltransferase 2, pseudogene; alpha-1,3-galactosyltransferase 2; iGb3 synthase; isoglobotriaosylceramide synthase
A4GALT	A4GALT	alpha 1,4-galactosyltransferase (P1PK blood group)	CD77 synthase; GB3 synthase; P blood group (P one antigen); P one antigen (P blood group); P(k) antigen synthase; P1/Pk synthase; UDP-galactose:beta-D-galactosyl-beta1-R 4-alpha-D-galactosyltransferase; alpha 1,4-galactosyltransferase (P blood group); alpha 14-galactosyltransferase; alpha-1,4-N-acetylglucosaminyltransferase; alpha-1,4-galactosyltransferase; alpha4Gal-T1; globotriaosylceramide syn…
A4GNT	A4GNT	alpha-1,4-N-acetylglucosaminyltransferase	alpha-1,4-N-acetylglucosaminyltransferase
AAAS	AAAS	aladin WD repeat nucleoporin	Allgrove, triple-A; achalasia, adrenocortical insufficiency, alacrimia; aladin
AACS	AACS	acetoacetyl-CoA synthetase	acetoacetate-CoA ligase; acetoacetyl-CoA synthetase; acyl-CoA synthetase family member 1; homolog of C. elegans supressor of ras 5 (sur-5); protein sur-5 homolog
AADAC	AADAC	arylacetamide deacetylase	arylacetamide deacetylase; arylacetamide deacetylase (esterase)
AADACL2	AADACL2	arylacetamide deacetylase like 2	arylacetamide deacetylase-like 2
AADACL3	AADACL3	arylacetamide deacetylase like 3	arylacetamide deacetylase-like 3
AADACL4	AADACL4	arylacetamide deacetylase like 4	arylacetamide deacetylase-like 4
AADAT	AADAT	aminoadipate aminotransferase	2-aminoadipate aminotransferase; 2-aminoadipate transaminase; KAT/AadAT; L kynurenine/alpha aminoadipate aminotransferase; alpha-aminoadipate aminotransferase; glycine transaminase AADAT; kynurenine aminotransferase II; kynurenine--glyoxylate transaminase AADAT; kynurenine--oxoglutarate aminotransferase II; kynurenine--oxoglutarate transaminase 2; kynurenine--oxoglutarate transaminase II; kynuren…
AAGAB	AAGAB	alpha and gamma adaptin binding protein	alpha- and gamma-adaptin-binding protein p34; punctate palmoplantar keratoderma type I
AAK1	AAK1	AP2 associated kinase 1	AP2-associated protein kinase 1; adaptor-associated kinase 1; alternative protein AAK1
AAMDC	AAMDC	adipogenesis associated Mth938 domain containing	UPF0366 protein C11orf67; adipogenesis associated Mth938 domain-containing protein; mth938 domain-containing protein
AAMP	AAMP	angio associated migratory cell protein	angio-associated migratory cell protein
AANAT	AANAT	aralkylamine N-acetyltransferase	arylalkylamine N-acetyltransferase; serotonin N-acetyltransferase; serotonin acetylase
AAR2	AAR2	AAR2 splicing factor	AAR2 splicing factor homolog; protein AAR2 homolog
AARD	AARD	alanine and arginine rich domain containing protein	alanine and arginine-rich domain-containing protein
AARS1	AARS1	alanyl-tRNA synthetase 1	alaRS; alanine tRNA ligase 1, cytoplasmic; alanine--tRNA ligase, cytoplasmic; alanyl-tRNA synthetase, cytoplasmic; protein lactyltransferase AARS1; renal carcinoma antigen NY-REN-42
AARS2	AARS2	alanyl-tRNA synthetase 2, mitochondrial	alanine tRNA ligase 2, mitochondrial (putative); alanine--tRNA ligase, mitochondrial; alanyl-tRNA synthetase 2, mitochondrial (putative); alanyl-tRNA synthetase like; probable alanyl-tRNA synthetase, mitochondrial
AARSD1	AARSD1	alanyl-tRNA synthetase domain containing 1	alanyl-tRNA editing protein Aarsd1; alanyl-tRNA synthetase domain-containing protein 1
AASDH	AASDH	aminoadipate-semialdehyde dehydrogenase	2-aminoadipic 6-semialdehyde dehydrogenase; acyl-CoA synthetase family member 4; beta-alanine-activating enzyme; non-ribosomal peptide synthetase 1098; non-ribosomal peptide synthetase 998
AASDHPPT	AASDHPPT	aminoadipate-semialdehyde dehydrogenase-phosphopantetheinyl transferase	4'-phosphopantetheinyl transferase; L-aminoadipate-semialdehyde dehydrogenase-phosphopantetheinyl transferase; LYS5 ortholog; alpha-aminoadipic semialdehyde dehydrogenase-phosphopantetheinyl transferase; holo ACP synthase; holo-[acyl-carrier-protein] synthase
AASS	AASS	aminoadipate-semialdehyde synthase	alpha-aminoadipate semialdehyde synthase; alpha-aminoadipic semialdehyde synthase, mitochondrial; aminoadipic semialdehyde synthase; lysine-2-oxoglutarate reductase; lysine-ketoglutarate reductase /saccharopine dehydrogenase; saccharopine dehydrogenase (NAD(+), L-glutamate-forming); saccharopine dehydrogenase (NADP(+), L-lysine-forming)
AATF	AATF	apoptosis antagonizing transcription factor	protein AATF; rb-binding protein Che-1
AATK	AATK	apoptosis associated tyrosine kinase	CDK5-binding protein; brain apoptosis-associated tyrosine kinase; lemur tyrosine kinase 1; p35-binding protein; protein phosphatase 1, regulatory subunit 77; serine/threonine-protein kinase LMTK1
ABAT	ABAT	4-aminobutyrate aminotransferase	(S)-3-amino-2-methylpropionate transaminase; 4-aminobutyrate aminotransferase, mitochondrial; 4-aminobutyrate transaminase; GABA aminotransferase; GABA transaminase; GABA transferase; gamma-amino-N-butyrate transaminase; gamma-aminobutyrate aminotransferase
ABCA1	ABCA1	ATP binding cassette subfamily A member 1	ATP-binding cassette sub-family A member 1; ATP-binding cassette transporter A1; ATP-binding cassette, sub-family A (ABC1), member 1; cholesterol efflux regulatory protein; membrane-bound; phospholipid-transporting ATPase ABCA1
ABCA10	ABCA10	ATP binding cassette subfamily A member 10	ATP-binding cassette A10; ATP-binding cassette sub-family A member 10; ATP-binding cassette, sub-family A (ABC1), member 10
ABCA12	ABCA12	ATP binding cassette subfamily A member 12	ATP-binding cassette transporter 12; ATP-binding cassette, sub-family A (ABC1), member 12; glucosylceramide transporter ABCA12
ABCA13	ABCA13	ATP binding cassette subfamily A member 13	ATP binding cassette transporter A13; ATP-binding cassette sub-family A member 13; ATP-binding cassette, sub-family A (ABC1), member 13
ABCA2	ABCA2	ATP binding cassette subfamily A member 2	ATP-binding cassette 2; ATP-binding cassette sub-family A member 2; ATP-binding cassette transporter 2; ATP-binding cassette, sub-family A (ABC1), member 2; ATP-binding cassette, sub-family A, member 2
ABCA3	ABCA3	ATP binding cassette subfamily A member 3	ABC transporter 3; ABC-C transporter; ATP-binding cassette sub-family A member 3; ATP-binding cassette transporter 3; ATP-binding cassette, sub-family A (ABC1), member 3; phospholipid-transporting ATPase ABCA3; xenobiotic-transporting ATPase ABCA3
ABCA4	ABCA4	ATP binding cassette subfamily A member 4	ATP binding cassette transporter; ATP-binding cassette sub-family A member 4; ATP-binding cassette transporter, retinal-specific; ATP-binding cassette, sub-family A (ABC1), member 4; ATP-binding transporter, retina-specific; RIM ABC transporter; RIM protein; RIM proteinv; photoreceptor rim protein; retina-specific ABC transporter; retinal-specific ATP-binding cassette transporter; retinal-specifi…
ABCA5	ABCA5	ATP binding cassette subfamily A member 5	ATP-binding cassette A5; ATP-binding cassette, sub-family A (ABC1), member 5; cholesterol transporter ABCA5
ABCA6	ABCA6	ATP binding cassette subfamily A member 6	ABC transporter ABCA6; ATP-binding cassette A6; ATP-binding cassette sub-family A member 6; ATP-binding cassette, sub-family A (ABC1), member 6
ABCA7	ABCA7	ATP binding cassette subfamily A member 7	ATP-binding cassette sub-family A member 7; ATP-binding cassette, sub-family A (ABC1), member 7; autoantigen SS-N; macrophage ABC transporter; phospholipid-transporting ATPase ABCA7
ABCA8	ABCA8	ATP binding cassette subfamily A member 8	ABC-type organic anion transporter ABCA8; ATP-binding cassette, sub-family A (ABC1), member 8
ABCA9	ABCA9	ATP binding cassette subfamily A member 9	ATP-binding cassette A9; ATP-binding cassette sub-family A member 9; ATP-binding cassette, sub-family A (ABC1), member 9
ABCB1	ABCB1	ATP binding cassette subfamily B member 1	ATP-binding cassette, sub-family B (MDR/TAP), member 1; ATP-dependent translocase ABCB1; P-glycoprotein 1; colchicin sensitivity; doxorubicin resistance; multidrug resistance protein 1; phospholipid transporter ABCB1
ABCB10	ABCB10	ATP binding cassette subfamily B member 10	ABC transporter 10 protein; ABC-me protein; ABC-mitochondrial erythroid protein; ATP-binding cassette sub-family B member 10, mitochondrial; ATP-binding cassette transporter 10; ATP-binding cassette, sub-family B (MDR/TAP), member 10; mitochondrial ATP-binding cassette 2
ABCB11	ABCB11	ATP binding cassette subfamily B member 11	ABC member 16, MDR/TAP subfamily; ATP-binding cassette sub-family B member 11; ATP-binding cassette, sub-family B (MDR/TAP), member 11; bile salt export pump; progressive familial intrahepatic cholestasis 2; sister p-glycoprotein
ABCB4	ABCB4	ATP binding cassette subfamily B member 4	ATP-binding cassette sub-family B member 4; ATP-binding cassette, sub-family B (MDR/TAP), member 4; P-glycoprotein 3; P-glycoprotein-3/multiple drug resistance-3; multidrug resistance protein 3; multiple drug resistance 3; phosphatidylcholine translocator ABCB4
ABCB5	ABCB5	ATP binding cassette subfamily B member 5	ABCB5 P-gp; ATP-binding cassette protein; ATP-binding cassette sub-family B member 5; ATP-binding cassette, sub-family B (MDR/TAP), member 5; P-glycoprotein ABCB5
ABCB6	ABCB6	ATP binding cassette subfamily B member 6 (LAN blood group)	ABC-type heme transporter ABCB6; ATP binding cassette subfamily B member 6 (Langereis blood group); ATP-binding cassette half-transporter; ATP-binding cassette sub-family B member 6; ATP-binding cassette, sub-family B (MDR/TAP), member 6 (Langereis blood group); P-glycoprotein-related protein; mitochondrial ABC transporter 3; mt-ABC transporter 3; ubiquitously-expressed mammalian ABC half transpo…
ABCB7	ABCB7	ATP binding cassette subfamily B member 7	ABC transporter 7 protein; ATP-binding cassette sub-family B member 7, mitochondrial; ATP-binding cassette transporter 7; ATP-binding cassette, sub-family B (MDR/TAP), member 7; iron-sulfur clusters transporter ABCB7, mitochondrial
ABCB8	ABCB8	ATP binding cassette subfamily B member 8	ATP-binding cassette sub-family B member 8, mitochondrial; ATP-binding cassette, sub-family B (MDR/TAP), member 8; mitochondrial ABC protein; mitochondrial ATP-binding cassette 1; mitochondrial potassium channel ATP-binding subunit; mitochondrial sulfonylurea-receptor
ABCB9	ABCB9	ATP binding cassette subfamily B member 9	ABC transporter 9 protein; ABC-type oligopeptide transporter ABCB9; ATP-binding cassette sub-family B member 9; ATP-binding cassette, sub-family B (MDR/TAP), member 9; TAP-like protein
ABCC1	ABCC1	ATP binding cassette subfamily C member 1 (ABCC1 blood group)	ATP-binding cassette transporter variant ABCC1delta-ex13; ATP-binding cassette transporter variant ABCC1delta-ex13&14; ATP-binding cassette transporter variant ABCC1delta-ex25; ATP-binding cassette transporter variant ABCC1delta-ex25&26; ATP-binding cassette, sub-family C (CFTR/MRP), member 1; LTC4 transporter; glutathione S-conjugate export pump; glutathione-S-conjugate-translocating ATPase ABCC…
ABCC10	ABCC10	ATP binding cassette subfamily C member 10	ATP-binding cassette sub-family C member 10; ATP-binding cassette, sub-family C (CFTR/MRP), member 10; multidrug resistance-associated protein 7
ABCC11	ABCC11	ATP binding cassette subfamily C member 11	ATP-binding cassette protein C11; ATP-binding cassette sub-family C member 11; ATP-binding cassette transporter MRP8; ATP-binding cassette transporter sub-family C member 11; ATP-binding cassette, sub-family C (CFTR/MRP), member 11; multi-resistance protein 8; multidrug resistance-associated protein 8
ABCC12	ABCC12	ATP binding cassette subfamily C member 12	ATP-binding cassette sub-family C member 12; ATP-binding cassette transporter sub-family C member 12; ATP-binding cassette, sub-family C (CFTR/MRP), member 12; multidrug resistance-associated protein 9
ABCC2	ABCC2	ATP binding cassette subfamily C member 2	ATP-binding cassette sub-family C member 2; ATP-binding cassette, sub-family C (CFTR/MRP), member 2; canalicular multidrug resistance protein; canalicular multispecific organic anion transporter 1; multidrug resistance-associated protein 2
ABCC3	ABCC3	ATP binding cassette subfamily C member 3	ATP-binding cassette sub-family C member 3; ATP-binding cassette, sub-family C (CFTR/MRP), member 3; canalicular multispecific organic anion transporter 2; canicular multispecific organic anion transporter; multi-specific organic anion transporter D; multidrug resistance associated protein; multidrug resistance-associated protein 3
ABCC4	ABCC4	ATP binding cassette subfamily C member 4 (PEL blood group)	ATP-binding cassette sub-family C member 4; MRP/cMOAT-related ABC transporter; bA464I2.1 (ATP-binding cassette, sub-family C (CFTR/MRP), member 4); canalicular multispecific organic anion transporter (ABC superfamily); multi-specific organic anion transporter B; multidrug resistance-associated protein 4
ABCC5	ABCC5	ATP binding cassette subfamily C member 5	ATP-binding cassette sub-family C member 5; ATP-binding cassette, sub-family C (CFTR/MRP), member 5; canalicular multispecific organic anion transporter C; multi-specific organic anion transporter C; multidrug resistance-associated protein 5
ABCC6	ABCC6 | ABCC6P1 | ABCC6P2	ATP binding cassette subfamily C member 6 | ATP binding cassette subfamily C member 6 pseudogene 1 | ATP binding cassette subfamily C member 6 pseudogene 2	ATP-binding cassette sub-family C member 6; ATP-binding cassette, sub-family C (CFTR/MRP), member 6; URG7 protein; anthracycline resistance-associated protein; multi-specific organic anion transporter E; multidrug resistance-associated protein 6 | ATP-binding cassette, sub-family C, member 6 pseudogene 1,ATP-binding cassette, sub-family C, member 6 pseudogene 1 (functional),ATP binding cassette s…
ABCC8	ABCC8	ATP binding cassette subfamily C member 8	ATP-binding cassette sub-family C member 8; ATP-binding cassette transporter sub-family C member 8; ATP-binding cassette, sub-family C (CFTR/MRP), member 8; sulfonylurea receptor (hyperinsulinemia); sulfonylurea receptor 1
ABCC9	ABCC9	ATP binding cassette subfamily C member 9	ATP-binding cassette sub-family C member 9; ATP-binding cassette transporter sub-family C member 9; ATP-binding cassette, sub-family C (CFTR/MRP), member 9; sulfonylurea receptor 2
ABCD1	ABCD1	ATP binding cassette subfamily D member 1	ATP-binding cassette sub-family D member 1; ATP-binding cassette, sub-family D (ALD), member 1; adrenoleukodystrophy protein
ABCD2	ABCD2	ATP binding cassette subfamily D member 2	ATP-binding cassette sub-family D member 2; ATP-binding cassette, sub-family D (ALD), member 2; adrenoleukodystrophy-like 1; adrenoleukodystrophy-related protein
ABCD3	ABCD3	ATP binding cassette subfamily D member 3	70 kDa peroxisomal membrane protein; ATP-binding cassette sub-family D member 3; ATP-binding cassette, sub-family D (ALD), member 3; Peroxisomal membrane protein-1 (70kD); dJ824O18.1 (ATP-binding cassette, sub-family D (ALD), member 3 (PMP70, PXMP1)); peroxisomal membrane protein 1 (70kD, Zellweger syndrome); peroxisomal membrane protein 70 kDa
ABCD4	ABCD4	ATP binding cassette subfamily D member 4	69 kDa peroxisomal ABC-transporter; ATP-binding cassette sub-family D member 4; ATP-binding cassette, sub-family D (ALD), member 4; PMP70-related protein; PXMP1-L; lysosomal cobalamin transporter ABCD4; peroxisomal membrane protein 69
ABCE1	ABCE1	ATP binding cassette subfamily E member 1	2'-5'-oligoadenylate-binding protein; ATP-binding cassette sub-family E member 1; ATP-binding cassette, sub-family E (OABP), member 1; RNase L inhibitor 1; huHP68; ribonuclease 4 inhibitor; ribonuclease L (2',5'-oligoisoadenylate synthetase-dependent) inhibitor
ABCF1	ABCF1	ATP binding cassette subfamily F member 1	ATP-binding cassette 50 (TNF-alpha stimulated); ATP-binding cassette sub-family F member 1; ATP-binding cassette, sub-family F (GCN20), member 1; TNF-alpha-stimulated ABC protein; TNFalpha-inducible ATP-binding protein
ABCF2	ABCF2	ATP binding cassette subfamily F member 2	ABC-type transport protein; ATP-binding cassette sub-family F member 2; ATP-binding cassette, sub-family F (GCN20), member 2; iron-inhibited ABC transporter 2
ABCF3	ABCF3	ATP binding cassette subfamily F member 3	ATP-binding cassette sub-family F member 3; ATP-binding cassette, sub-family F (GCN20), member 3
ABCG1	ABCG1	ATP binding cassette subfamily G member 1	ABC transporter 8; ATP-binding cassette sub-family G member 1; ATP-binding cassette transporter 8; ATP-binding cassette transporter member 1 of subfamily G; ATP-binding cassette, sub-family G (WHITE), member 1; homolog of Drosophila white; white protein homolog (ATP-binding cassette transporter 8)
ABCG2	ABCG2	ATP binding cassette subfamily G member 2 (JR blood group)	ABC transporter; ATP binding cassette subfamily G member 2 (Junior blood group); ATP-binding cassette transporter G2; ATP-binding cassette, sub-family G (WHITE), member 2 (Junior blood group); ATPbinding cassette transporter ABCG2; breast cancer resistance protein; broad substrate specificity ATP-binding cassette transporter ABCG2; broad substrate specificity ATP-binding cassette transporter ABCG…
ABCG4	ABCG4	ATP binding cassette subfamily G member 4	ATP-binding cassette sub-family G member 4; ATP-binding cassette, sub-family G (WHITE), member 4; putative ABC transporter
ABCG5	ABCG5	ATP binding cassette subfamily G member 5	ATP-binding cassette sub-family G member 5; ATP-binding cassette, sub-family G (WHITE), member 5; sterolin 1
ABCG8	ABCG8	ATP binding cassette subfamily G member 8	ATP-binding cassette sub-family G member 8; ATP-binding cassette, sub-family G (WHITE), member 8; sterolin 2
ABHD1	ABHD1	abhydrolase domain containing 1	abhydrolase domain-containing protein 1; alpha/beta hydrolase domain-containing protein 1; lung alpha/beta hydrolase 1; protein ABHD1; testicular tissue protein Li 5
ABHD10	ABHD10	abhydrolase domain containing 10, depalmitoylase	abhydrolase domain-containing protein 10, mitochondrial; acyl-protein thioesterase ABHD10; alpha/beta hydrolase domain-containing protein 10, mitochondrial; mycophenolic acid acyl-glucuronide esterase, mitochondrial; palmitoyl-protein thioesterase ABHD10, mitochondrial
ABHD11	ABHD11	abhydrolase domain containing 11	Williams Beuren syndrome chromosome region 21; abhydrolase domain-containing protein 11; alpha/beta hydrolase domain-containing protein 11; protein ABHD11; sn-1-specific diacylglycerol lipase ABHD11
ABHD12	ABHD12	abhydrolase domain containing 12, lysophospholipase	2-arachidonoylglycerol hydrolase ABHD12; abhydrolase domain-containing protein 12; lysophosphatidylserine lipase ABHD12; monoacylglycerol lipase ABHD12; oxidized phosphatidylserine lipase ABHD12
ABHD12B	ABHD12B	abhydrolase domain containing 12B	abhydrolase domain-containing protein 12B; alpha/beta hydrolase domain-containing protein 12B; protein ABHD12B
ABHD13	ABHD13	abhydrolase domain containing 13	abhydrolase domain-containing protein 13; alpha/beta hydrolase domain-containing protein 13; protein ABHD13
ABHD14A	ABHD14A	abhydrolase domain containing 14A	abhydrolase domain-containing protein 14A; alpha/beta hydrolase domain-containing protein 14A; protein ABHD14A
ABHD14B	ABHD14B	abhydrolase domain containing 14B	CCG1-interacting factor B; CCG1/TAFII250-interacting factor B; abhydrolase domain-containing protein 14B; alpha/beta hydrolase domain-containing protein 14B; cell cycle gene 1-interacting factor B; epididymis secretory protein Li 299; epididymis secretory sperm binding protein; protein ABHD14B; putative protein-lysine deacylase ABHD14B
ABHD15	ABHD15	abhydrolase domain containing 15	abhydrolase domain-containing protein 15; alpha/beta hydrolase domain-containing protein 15; protein ABHD15
ABHD16A	ABHD16A	abhydrolase domain containing 16A, phospholipase	HLA-B associated transcript 5; abhydrolase domain-containing protein 16A; alpha/beta hydrolase domain-containing protein 16A; monoacylglycerol lipase ABHD16A; phosphatidylserine lipase ABHD16A; protein ABHD16A; protein G5
ABHD16B	ABHD16B	abhydrolase domain containing 16B	ABHD16B; abhydrolase domain-containing protein 16B; alpha/beta hydrolase domain-containing protein 16B; protein ABHD16B
ABHD17A	ABHD17A	abhydrolase domain containing 17A, depalmitoylase	abhydrolase domain-containing protein 17A; abhydrolase domain-containing protein FAM108A1; alpha/beta hydrolase domain-containing protein 17A; family with sequence similarity 108, member A1; protein ABHD17A
ABHD17B	ABHD17B	abhydrolase domain containing 17B, depalmitoylase	abhydrolase domain-containing protein 17B; abhydrolase domain-containing protein FAM108B1; alpha/beta hydrolase domain-containing protein 17B; epididymis secretory sperm binding protein; family with sequence similarity 108, member B1; protein ABHD17B
ABHD17C	ABHD17C	abhydrolase domain containing 17C, depalmitoylase	abhydrolase domain-containing protein 17C; abhydrolase domain-containing protein FAM108C1; alpha/beta hydrolase domain-containing protein 17C; family with sequence similarity 108, member C1; protein ABHD17C
ABHD18	ABHD18	abhydrolase domain containing 18	abhydrolase domain-containing protein 18; alpha/beta hydrolase domain-containing protein 18; protein ABHD18
ABHD2	ABHD2	abhydrolase domain containing 2, acylglycerol lipase	2-arachidonoylglycerol hydrolase; abhydrolase domain-containing protein 2; acetylesterase; alpha/beta hydrolase domain containing protein 2; lung alpha/beta hydrolase 2; monoacylglycerol lipase ABHD2; progesterone-sensitive lipase; protein PHPS1-2; testicular tissue protein Li 6
ABHD3	ABHD3	abhydrolase domain containing 3, phospholipase	abhydrolase domain-containing protein 3; alpha/beta hydrolase domain containing protein 3; lung alpha/beta hydrolase 3; phospholipase ABHD3
ABHD4	ABHD4	abhydrolase domain containing 4, N-acyl phospholipase B	(Lyso)-N-acylphosphatidylethanolamine lipase; abhydrolase domain-containing protein 4; alpha/beta hydrolase domain-containing protein 4; alpha/beta-hydrolase 4; lyso-N-acylphosphatidylethanolamine lipase; protein ABHD4
ABHD5	ABHD5	abhydrolase domain containing 5, lysophosphatidic acid acyltransferase	1-acylglycerol-3-phosphate O-acyltransferase ABHD5; abhydrolase domain-containing protein 5; lipid droplet-binding protein CGI-58
ABHD6	ABHD6	abhydrolase domain containing 6, acylglycerol lipase	2-arachidonoylglycerol hydrolase; abhydrolase domain-containing protein 6; lipase protein; monoacylglycerol lipase ABHD6
ABHD8	ABHD8	abhydrolase domain containing 8	abhydrolase domain-containing protein 8; alpha/beta hydrolase domain-containing protein 8; protein ABHD8
ABI1	ABI1	abl interactor 1	Abelson interactor 1; Abl-interactor protein 1 long; abl interactor 1; abl-binding protein 4; eps8 SH3 domain-binding protein; interactor protein AblBP4; nap1 binding protein; spectrin SH3 domain-binding protein 1
ABI2	ABI2	abl interactor 2	abelson interactor 2; abl binding protein 3; abl interactor 2; abl-interacting protein 1 (SH3-containing protein); abl-interactor protein 2b; arg protein tyrosine kinase-binding protein; arg-binding protein 1
ABI3	ABI3	ABI family member 3	ABI gene family member 3; new molecule including SH3
ABI3BP	ABI3BP	ABI family member 3 binding protein	ABI family, member 3 (NESH) binding protein; ABI gene family member 3-binding protein; ABI gene family, member 3 (NESH) binding protein; nesh-binding protein; target of Nesh-SH3
ABITRAM	ABITRAM	actin binding transcription modulator	family with sequence similarity 206 member A; protein Abitram; protein FAM206A; protein Simiate
ABL1	ABL1	ABL proto-oncogene 1, non-receptor tyrosine kinase	ABL protooncogene 1 nonreceptor tyrosine kinase; Abelson tyrosine-protein kinase 1; BCR-ABL1 p190; BCR/ABL e8a2 fusion; BCR/ABL1 e1a2 fusion protein; BCR/ABL1 fusion; bcr/c-abl oncogene protein; c-abl oncogene 1, receptor tyrosine kinase; chimeric BCR::ABL1 protein; proto-oncogene c-Abl; proto-oncogene tyrosine-protein kinase ABL1; tyrosine-protein kinase ABL1; v-abl Abelson murine leukemia viral…
ABL2	ABL2	ABL proto-oncogene 2, non-receptor tyrosine kinase	Abelson tyrosine-protein kinase 2; abelson-related gene protein; c-abl oncogene 2, non-receptor tyrosine kinase; tyrosine-protein kinase ABL2; tyrosine-protein kinase ARG; v-abl Abelson murine leukemia viral oncogene homolog 2
ABLIM1	ABLIM1	actin binding LIM protein 1	actin-binding LIM protein 1; actin-binding LIM protein family member 1; actin-binding double-zinc-finger protein
ABLIM2	ABLIM2	actin binding LIM protein family member 2	abLIM-2; actin-binding LIM protein 2; testis tissue sperm-binding protein Li 35a
ABLIM3	ABLIM3	actin binding LIM protein family member 3	abLIM-3; actin-binding LIM protein 3
ABO	ABO	ABO, alpha 1-3-N-acetylgalactosaminyltransferase and alpha 1-3-galactosyltransferase	ABO blood group (transferase A, alpha 1-3-N-acetylgalactosaminyltransferase; transferase B, alpha 1-3-galactosyltransferase); B(A) alpha-1,3-galactosyltransferase; histo-blood group A2 transferase; histo-blood group ABO system transferase
ABR	ABR	ABR activator of RhoGEF and GTPase	ABR, RhoGEF and GTPase activating protein; active BCR-related; active breakpoint cluster region-related protein
ABRA	ABRA	actin binding Rho activating protein	actin-binding Rho-activating protein; striated muscle activator of Rho-dependent signaling
ABRACL	ABRACL	ABRA C-terminal like	ABRA C-terminal-like protein; costars family protein ABRACL
ABRAXAS1	ABRAXAS1	abraxas 1, BRCA1 A complex subunit	BRCA1-A complex subunit Abraxas 1; abraxas protein; coiled-coil domain containing 98; family with sequence similarity 175 member A
ABRAXAS2	ABRAXAS2	abraxas 2, BRISC complex subunit	BRISC complex subunit Abraxas 2; BRISC complex subunit Abro1; abraxas brother 1; abraxas brother protein 1; family with sequence similarity 175 member B
ABT1	ABT1	activator of basal transcription 1	TATA-binding protein-binding protein; activator of basal transcription 1; basal transcriptional activator
ABTB1	ABTB1	ankyrin repeat and BTB domain containing 1	ankyrin repeat and BTB (POZ) domain containing 1; ankyrin repeat and BTB/POZ domain-containing protein 1; elongation factor 1A-binding protein
ABTB2	ABTB2	ankyrin repeat and BTB domain containing 2	ankyrin repeat and BTB (POZ) domain containing 2; ankyrin repeat and BTB/POZ domain-containing protein 2
ABTB3	ABTB3	ankyrin repeat and BTB domain containing 3	ANK-repeat BTB domain containing protein; BTB (POZ) domain containing 11; BTB domain containing 11; BTB/POZ domain-containing protein 11; ankyrin repeat and BTB/POZ domain-containing protein 3; ankyrin repeat and BTB/POZ domain-containing protein BTBD11
ACAA1	ACAA1	acetyl-CoA acyltransferase 1	3-ketoacyl-CoA thiolase, peroxisomal; acetyl-CoA C-myristoyltransferase; acetyl-Coenzyme A acyltransferase 1; beta-ketothiolase; epididymis secretory sperm binding protein; peroxisomal 3-oxoacyl-CoA thiolase; peroxisomal 3-oxoacyl-Coenzyme A thiolase; testicular tissue protein Li 197
ACAA2	ACAA2	acetyl-CoA acyltransferase 2	3-ketoacyl-CoA thiolase, mitochondrial; acetyl-CoA acetyltransferase; acetyl-Coenzyme A acyltransferase 2; acyl-CoA hydrolase, mitochondrial; beta ketothiolase; mitochondrial 3-oxoacyl-CoA thiolase; mitochondrial 3-oxoacyl-Coenzyme A thiolase
ACACA	ACACA	acetyl-CoA carboxylase alpha	ACC-alpha; acetyl-CoA carboxylase 1; acetyl-Coenzyme A carboxylase alpha
ACACB	ACACB	acetyl-CoA carboxylase beta	acetyl-CoA carboxylase 2; acetyl-Coenzyme A carboxylase beta
ACAD10	ACAD10	acyl-CoA dehydrogenase family member 10	ACAD-10; acyl-CoA dehydrogenase family member 10; acyl-Coenzyme A dehydrogenase family, member 10
ACAD11	ACAD11 | NPHP3-ACAD11	acyl-CoA dehydrogenase family member 11 | NPHP3-ACAD11 readthrough (NMD candidate)	acyl-CoA dehydrogenase family member 11; acyl-Coenzyme A dehydrogenase family, member 11 | Nephrocystin-3
ACAD8	ACAD8	acyl-CoA dehydrogenase family member 8	activator-recruited cofactor 42 kDa component; acyl-Coenzyme A dehydrogenase family, member 8; isobutyryl-CoA dehydrogenase, mitochondrial
ACAD9	ACAD9	acyl-CoA dehydrogenase family member 9	acyl-Coenzyme A dehydrogenase family, member 9; complex I assembly factor ACAD9, mitochondrial; very-long-chain acyl-CoA dehydrogenase VLCAD
ACADL	ACADL	acyl-CoA dehydrogenase long chain	acyl-Coenzyme A dehydrogenase, long chain; long-chain acyl-CoA dehydrogenase; long-chain specific acyl-CoA dehydrogenase, mitochondrial
ACADM	ACADM	acyl-CoA dehydrogenase medium chain	acyl-CoA dehydrogenase, C-4 to C-12 straight chain; acyl-Coenzyme A dehydrogenase, C-4 to C-12 straight chain; medium-chain acyl-CoA dehydrogenase; medium-chain specific acyl-CoA dehydrogenase, mitochondrial; testicular tissue protein Li 7
ACADS	ACADS	acyl-CoA dehydrogenase short chain	acyl-CoA dehydrogenase, C-2 to C-3 short chain; acyl-Coenzyme A dehydrogenase, C-2 to C-3 short chain; butyryl-CoA dehydrogenase; epididymis secretory sperm binding protein; mitochondrial short-chain specific acyl-CoA dehydrogenase; short-chain specific acyl-CoA dehydrogenase, mitochondrial; unsaturated acyl-CoA reductase
ACADSB	ACADSB	acyl-CoA dehydrogenase short/branched chain	2-methyl branched chain acyl-CoA dehydrogenase; 2-methylbutyryl-coenzyme A dehydrogenase; acyl-Coenzyme A dehydrogenase, short/branched chain; short/branched chain specific acyl-CoA dehydrogenase, mitochondrial
ACADVL	ACADVL	acyl-CoA dehydrogenase very long chain	acyl-Coenzyme A dehydrogenase, very long chain; very long-chain specific acyl-CoA dehydrogenase, mitochondrial
ACAN	ACAN	aggrecan	aggrecan core protein; cartilage-specific proteoglycan core protein; chondroitin sulfate proteoglycan core protein 1; large aggregating proteoglycan
ACAP1	ACAP1	ArfGAP with coiled-coil, ankyrin repeat and PH domains 1	Arf GAP with coiled coil, ANK repeat and PH domains 1; arf-GAP with coiled-coil, ANK repeat and PH domain-containing protein 1; centaurin-beta-1; cnt-b1
ACAP2	ACAP2	ArfGAP with coiled-coil, ankyrin repeat and PH domains 2	Arf GAP with coiled coil, ANK repeat and PH domains 2; arf-GAP with coiled-coil, ANK repeat and PH domain-containing protein 2; centaurin-beta-2
ACAP3	ACAP3	ArfGAP with coiled-coil, ankyrin repeat and PH domains 3	arf-GAP with coiled-coil, ANK repeat and PH domain-containing protein 3; centaurin-beta-5; cnt-b5
ACAT1	ACAT1	acetyl-CoA acetyltransferase 1	acetoacetyl Coenzyme A thiolase; acetoacetyl-CoA thiolase; acetyl-CoA acetyltransferase, mitochondrial; acetyl-Coenzyme A acetyltransferase 1; mitochondrial acetoacetyl-CoA thiolase; testicular tissue protein Li 198
ACAT2	ACAT2	acetyl-CoA acetyltransferase 2	acetoacetyl Coenzyme A thiolase; acetyl-CoA acetyltransferase, cytosolic; acetyl-CoA transferase-like protein; cytosolic acetoacetyl-CoA thiolase
ACBD3	ACBD3	acyl-CoA binding domain containing 3	Golgi resident protein GCP60; PBR- and PKA-associated protein 7; PKA (RIalpha)-associated protein; acyl-Coenzyme A binding domain containing 3; golgi complex associated protein 1, 60kDa; golgi phosphoprotein 1; peripheral benzodiazepine receptor-associated protein PAP7
ACBD4	ACBD4	acyl-CoA binding domain containing 4	acyl-CoA-binding domain-containing protein 4; acyl-Coenzyme A binding domain containing 4
ACBD5	ACBD5	acyl-CoA binding domain containing 5	acyl-CoA-binding domain-containing protein 5; acyl-Coenzyme A binding domain containing 5; endozepine-related protein; membrane-associated diazepam binding inhibitor
ACBD6	ACBD6	acyl-CoA binding domain containing 6	acyl-CoA-binding domain-containing protein 6; acyl-Coenzyme A binding domain containing 6
ACBD7	ACBD7	acyl-CoA binding domain containing 7	acyl-CoA-binding domain-containing protein 7; acyl-Coenzyme A binding domain containing 7
ACCS	ACCS	1-aminocyclopropane-1-carboxylate synthase homolog (inactive)	1-aminocyclopropane-1-carboxylate synthase-like protein 1; ACC synthase-like protein 1
ACCSL	ACCSL	1-aminocyclopropane-1-carboxylate synthase homolog (inactive) like	1-aminocyclopropane-1-carboxylate synthase (inactive)-like; 1-aminocyclopropane-1-carboxylate synthase homolog(non-functional)-like; 1-aminocyclopropane-1-carboxylate synthase-like protein 2; ACC synthase-like protein 2; probable inactive 1-aminocyclopropane-1-carboxylate synthase-like protein 2
ACD	ACD	ACD shelterin complex subunit and telomerase recruitment factor	POT1 and TIN2-interacting protein; TIN2 interacting protein 1; adrenocortical dysplasia homolog; adrenocortical dysplasia protein homolog
ACE	ACE	angiotensin I converting enzyme	CD143 antigen; angiotensin I converting enzyme (peptidyl-dipeptidase A) 1; angiotensin-converting enzyme; carboxycathepsin; dipeptidyl carboxypeptidase 1; dipeptidyl carboxypeptidase I; kininase II; peptidase P
ACE2	ACE2	angiotensin converting enzyme 2	ACE-related carboxypeptidase; angiotensin I converting enzyme (peptidyl-dipeptidase A) 2; angiotensin I converting enzyme 2; angiotensin-converting enzyme 2; angiotensin-converting enzyme homolog; angiotensin-converting enzyme-related carboxypeptidase; metalloprotease MPROT15; peptidyl-dipeptidase A
ACER1	ACER1	alkaline ceramidase 1	CTB-180A7.3; N-acylsphingosine amidohydrolase (alkaline ceramidase) 3; N-acylsphingosine amidohydrolase 3; acylsphingosine deacylase 3; alkCDase 1; alkaline CDase 1; alkaline ceramidase 1
ACER2	ACER2	alkaline ceramidase 2	alkCDase 2; alkaline CDase 2; alkaline ceramidase 2; ceramide hydrolase; haCER2
ACER3	ACER3	alkaline ceramidase 3	alkCDase 3; alkaline CDase 3; alkaline ceramidase 3; alkaline dihydroceramidase SB89; alkaline phytoceramidase; phytoceramidase, alkaline
ACHE	ACHE	acetylcholinesterase (Yt blood group)	Yt blood group; acetylcholinesterase; acetylcholinesterase (Cartwright blood group); apoptosis-related acetylcholinesterase
ACIN1	ACIN1	apoptotic chromatin condensation inducer 1	apoptotic chromatin condensation inducer in the nucleus; functional spliceosome-associated protein 152
ACKR1	ACKR1	atypical chemokine receptor 1 (Duffy blood group)	Duffy antigen chemokine receptor; Duffy blood group antigen; Duffy blood group system protein; Duffy blood group, chemokine receptor; Fy glycoprotein; atypical chemokine receptor 1; bloodgroup FY protein; glycoprotein D; plasmodium vivax receptor; solute carrier family 29 member 1 (augustine blood group)
ACKR2	ACKR2	atypical chemokine receptor 2	C-C chemokine receptor D6; CC-chemokine-binding receptor JAB61; atypical chemokine receptor 2; chemokine (C-C motif) receptor 9; chemokine (C-C) receptor 9; chemokine receptor CCR-10; chemokine receptor CCR-9; chemokine receptor D6; chemokine-binding protein 2; chemokine-binding protein D6
ACKR3	ACKR3	atypical chemokine receptor 3	C-X-C chemokine receptor type 7; G protein-coupled receptor; G-protein coupled receptor 159; G-protein coupled receptor RDC1 homolog; atypical chemokine receptor 3; chemokine (C-X-C motif) receptor 7; chemokine orphan receptor 1
ACKR4	ACKR4	atypical chemokine receptor 4	C-C CKR-11; C-C chemokine receptor type 11; CC chemokine receptor-like 1; atypical chemokine receptor 4; chemocentryx chemokine receptor; chemokine (C-C motif) receptor-like 1; chemokine, cc motif, receptor-like protein 1; orphan seven-transmembrane receptor, chemokine related
ACLY	ACLY	ATP citrate lyase	ATP-citrate (pro-S-)-lyase; ATP-citrate synthase; citrate cleavage enzyme
ACMSD	ACMSD	aminocarboxymuconate semialdehyde decarboxylase	2-amino-3-carboxymuconate-6-semialdehyde decarboxylase; picolinate carboxylase
ACO1	ACO1	aconitase 1	aconitase 1, soluble; aconitate hydratase, cytoplasmic; citrate hydro-lyase; cytoplasmic aconitase; cytoplasmic aconitate hydratase; cytosplasmic aconitase; epididymis luminal protein 60; epididymis secretory sperm binding protein; ferritin repressor protein; iron regulatory protein 1; iron-responsive element-binding protein 1; soluble aconitase
ACO2	ACO2	aconitase 2	aconitase 2, mitochondrial; aconitate hydratase, mitochondrial; citrate hydro-lyase; epididymis secretory sperm binding protein Li 284; mitochondrial aconitase
ACOD1	ACOD1	aconitate decarboxylase 1	cis-aconitate decarboxylase; cis-aconitic acid decarboxylase; immune-responsive gene 1 protein homolog; immunoresponsive 1 homolog
ACOT1	ACOT1 | ACOT2	acyl-CoA thioesterase 1 | acyl-CoA thioesterase 2	CTE-I; CTE-Ib; acyl-coenzyme A thioesterase 1; inducible cytosolic acyl-coenzyme A thioester hydrolase; long chain acyl-CoA hydrolase; long chain acyl-CoA thioester hydrolase; palmitoyl-coenzyme A thioesterase | acyl-coenzyme A thioester hydrolase 2a; acyl-coenzyme A thioesterase 2, mitochondrial; long-chain acyl-CoA thioesterase 2; mitochondrial acyl-CoA thioesterase 1; peroxisomal long-chain ac…
ACOT11	ACOT11	acyl-CoA thioesterase 11	START domain containing 14; StAR-related lipid transfer (START) domain containing 14; acyl-CoA thioester hydrolase 11; acyl-coenzyme A thioesterase 11; adipose-associated thioesterase; brown fat-inducible thioesterase; palmitoyl-coenzyme A thioesterase; thioesterase superfamily member 1; thioesterase, adipose associated
ACOT12	ACOT12	acyl-CoA thioesterase 12	START domain-containing protein 15; StAR-related lipid transfer (START) domain containing 15; acetyl-coenzyme A thioesterase; acyl-CoA thioester hydrolase 12; acyl-coenzyme A thioesterase 12; cytoplasmic acetyl-CoA hydrolase 1; cytosolic acetyl-CoA hydrolase; hCACH-1
ACOT13	ACOT13	acyl-CoA thioesterase 13	acyl-coenzyme A thioesterase 13; hotdog-fold thioesterase superfamily member 2; hypothalamus protein HT012; palmitoyl-CoA hydrolase; thioesterase superfamily member 2
ACOT2	ACOT2	acyl-CoA thioesterase 2	acyl-coenzyme A thioester hydrolase 2a; acyl-coenzyme A thioesterase 2, mitochondrial; long-chain acyl-CoA thioesterase 2; mitochondrial acyl-CoA thioesterase 1; peroxisomal long-chain acyl-coA thioesterase 2
ACOT4	ACOT4	acyl-CoA thioesterase 4	PTE-2b; acyl-coenzyme A thioesterase 4; peroxisomal acyl coenzyme A thioester hydrolase Ib; peroxisomal acyl-CoA thioesterase 2B; peroxisomal long-chain acyl-CoA thioesterase Ib; peroxisomal succinyl-coenzyme A thioesterase
ACOT6	ACOT6	acyl-CoA thioesterase 6	acyl-coenzyme A thioesterase 6; putative acyl-CoA thioesterase 6; putative acyl-coenzyme A thioesterase 6
ACOT7	ACOT7	acyl-CoA thioesterase 7	CTE-IIa; acyl-CoA thioesterase 2; acyl-CoA thioesterase, long chain; brain acyl-CoA hydrolase; cytosolic acyl coenzyme A thioester hydrolase; long chain acyl-CoA thioester hydrolase
ACOT8	ACOT8	acyl-CoA thioesterase 8	HIV-Nef associated acyl-CoA thioesterase; Nef (lentivirus myristoylated factor) associated protein 1; acyl-coenzyme A thioesterase 8; choloyl-CoA hydrolase; choloyl-coenzyme A thioesterase; long-chain fatty-acyl-CoA hydrolase; palmitoyl-CoA hydrolase; peroxisomal acyl-CoA thioesterase 1; peroxisomal acyl-CoA thioesterase 2; peroxisomal acyl-coenzyme A thioester hydrolase 1; peroxisomal long-chain…
ACOT9	ACOT9	acyl-CoA thioesterase 9	acyl-CoA thioester hydrolase 9; acyl-Coenzyme A thioesterase 2, mitochondrial; acyl-coenzyme A thioesterase 9, mitochondrial; mitochondrial Acyl-CoA Thioesterase
ACOX1	ACOX1	acyl-CoA oxidase 1	acyl-CoA oxidase 1, palmitoyl; acyl-CoA oxidase, straight-chain; acyl-Coenzyme A oxidase 1, palmitoyl; palmitoyl-CoA oxidase; peroxisomal acyl-coenzyme A oxidase 1; peroxisomal fatty acyl-CoA oxidase; straight-chain acyl-CoA oxidase
ACOX2	ACOX2	acyl-CoA oxidase 2	3-alpha,7-alpha,12-alpha-trihydroxy-5-beta-cholestanoyl-CoA 24-hydroxylase; 3-alpha,7-alpha,12-alpha-trihydroxy-5-beta-cholestanoyl-CoA oxidase; THCA-CoA oxidase; acyl-CoA oxidase 2, branched chain; acyl-Coenzyme A oxidase 2, branched chain; branched chain acyl-CoA oxidase; peroxisomal acyl-coenzyme A oxidase 2; peroxisomal branched chain acyl-CoA oxidase; trihydroxycoprostanoyl-CoA oxidase
ACOX3	ACOX3	acyl-CoA oxidase 3, pristanoyl	BRCACox; acyl-Coenzyme A oxidase 3, pristanoyl; branched-chain acyl-CoA oxidase; peroxisomal acyl-coenzyme A oxidase 3; pristanoyl-CoA oxidase
ACOXL	ACOXL	acyl-CoA oxidase like	acyl-CoA oxidase-like protein; acyl-coenzyme A oxidase-like protein
ACP1	ACP1	acid phosphatase 1	LMW-PTPase; acid phosphatase 1, soluble; acid phosphatase of erythrocyte; adipocyte acid phosphatase; cytoplasmic phosphotyrosyl protein phosphatase; low molecular weight cytosolic acid phosphatase; low molecular weight phosphotyrosine protein phosphatase; protein tyrosine phosphatase; red cell acid phosphatase 1; testicular secretory protein Li 37
ACP2	ACP2	acid phosphatase 2, lysosomal	lysosomal acid phosphatase
ACP3	ACP3	acid phosphatase 3	TMPase; acid phosphatase, prostate; ecto-5'-nucleotidase; prostatic acid phosphatase; prostatic acid phosphotase; protein tyrosine phosphatase ACP3; thiamine monophosphatase
ACP4	ACP4	acid phosphatase 4	acid phosphatase, testicular; testicular acid phosphatase
ACP5	ACP5	acid phosphatase 5, tartrate resistant	human purple acid phosphatase; tartrate-resistant acid ATPase; tartrate-resistant acid phosphatase 5a; tartrate-resistant acid phosphatase 5b; tartrate-resistant acid phosphatase type 5
ACP6	ACP6	acid phosphatase 6, lysophosphatidic	acid phosphatase-like protein 1; lysophosphatidic acid phosphatase type 6
ACP7	ACP7	acid phosphatase 7, tartrate resistant (putative)	acid phosphatase type 7; iron/zinc purple acid phosphatase-like protein; purple acid phosphatase long form 1
ACR	ACR	acrosin	acrosin; acrosin light and heavy chain prepropeptide; preproacrosin; proacrosin
ACRBP	ACRBP	acrosin binding protein	acrosin-binding protein; acrosin-binding protein, 60 kDa form; cancer/testis antigen 23; cancer/testis antigen OY-TES-1; proacrosin binding protein sp32; testicular tissue protein Li 10
ACRV1	ACRV1	acrosomal vesicle protein 1	acrosomal protein SP-10; sperm protein 10
ACSBG1	ACSBG1	acyl-CoA synthetase bubblegum family member 1	bubblegum; lipidosin; long-chain-fatty-acid--CoA ligase ACSBG1; very long-chain acyl-CoA synthetase
ACSBG2	ACSBG2	acyl-CoA synthetase bubblegum family member 2	arachidonate--CoA ligase ACSBG2; bubblegum-related protein; long-chain-fatty-acid--CoA ligase ACSBG2; testicular tissue protein Li 8
ACSF2	ACSF2	acyl-CoA synthetase family member 2	PPARG binding, long chain fatty acid acyl Co-A ligase like; acyl-CoA synthetase family member 2, mitochondrial; medium-chain acyl-CoA ligase ACSF2, mitochondrial
ACSF3	ACSF3	acyl-CoA synthetase family member 3	acyl-CoA synthetase family member 3, mitochondrial; malonate--CoA ligase ACSF3, mitochondrial; malonyl-CoA synthetase
ACSL1	ACSL1	acyl-CoA synthetase long chain family member 1	LACS 1; LACS 2; acyl-CoA synthetase 1; arachidonate--CoA ligase; fatty-acid-Coenzyme A ligase, long-chain 1; fatty-acid-Coenzyme A ligase, long-chain 2; lignoceroyl-CoA synthase; long-chain acyl-CoA synthetase 1; long-chain acyl-CoA synthetase 2; long-chain fatty acid-CoA ligase 2; long-chain fatty-acid-coenzyme A ligase 1; long-chain-fatty-acid--CoA ligase 1; palmitoyl-CoA ligase 1; palmitoyl-Co…
ACSL3	ACSL3	acyl-CoA synthetase long chain family member 3	arachidonate--CoA ligase; fatty acid CoA ligase Acsl3; fatty-acid-Coenzyme A ligase, long-chain 3; lignoceroyl-CoA synthase; long-chain acyl-CoA synthetase 3; long-chain-fatty-acid--CoA ligase 3; medium-chain acyl-CoA ligase Acsl3
ACSL4	ACSL4	acyl-CoA synthetase long chain family member 4	acyl-CoA synthetase 4; arachidonate--CoA ligase; fatty-acid-Coenzyme A ligase, long-chain 4; lignoceroyl-CoA synthase; long-chain acyl-CoA synthetase 4; long-chain fatty-acid-Coenzyme A ligase 4; long-chain-fatty-acid--CoA ligase 4
ACSL5	ACSL5	acyl-CoA synthetase long chain family member 5	FACL5 for fatty acid coenzyme A ligase 5; LACS 5; arachidonate--CoA ligase; fatty acid coenzyme A ligase 5; fatty-acid-Coenzyme A ligase, long-chain 5; long-chain acyl-CoA synthetase 5; long-chain fatty acid coenzyme A ligase 5; long-chain-fatty-acid--CoA ligase 5
ACSL6	ACSL6	acyl-CoA synthetase long chain family member 6	arachidonate--CoA ligase; fatty-acid-Coenzyme A ligase, long-chain 6; long fatty acyl-CoA synthetase 2; long-chain-fatty-acid--CoA ligase 6
ACSM1	ACSM1	acyl-CoA synthetase medium chain family member 1	Butyrate CoA ligase; acyl-coenzyme A synthetase ACSM1, mitochondrial; benzoate--CoA ligase; butyrate--CoA ligase 1; butyryl Coenzyme A synthetase 1; butyryl-coenzyme A synthetase 1; lipoate-activating enzyme; medium-chain acyl-CoA synthetase; middle-chain acyl-CoA synthetase 1; xenobiotic/medium-chain fatty acid-CoA ligase HXM-B
ACSM2A	ACSM2A	acyl-CoA synthetase medium chain family member 2A	acyl-CoA synthetase medium-chain family member 2; acyl-coenzyme A synthetase ACSM2A, mitochondrial; benzoate--CoA ligase; butyrate--CoA ligase 2A; butyryl-coenzyme A synthetase 2A; middle-chain acyl-CoA synthetase 2A
ACSM2B	ACSM2B	acyl-CoA synthetase medium chain family member 2B	acyl-CoA synthetase medium-chain family member 2; acyl-coenzyme A synthetase ACSM2B, mitochondrial; benzoate--CoA ligase; butyrate--CoA ligase 2B; butyryl-coenzyme A synthetase 2B; middle-chain acyl-CoA synthetase 2B; xenobiotic/medium-chain fatty acid-CoA ligase HXM-A; xenobiotic/medium-chain fatty acid:CoA ligase
ACSM3	ACSM3	acyl-CoA synthetase medium chain family member 3	SA (rat hypertension-associated) homolog; SA hypertension-associated homolog; acyl-coenzyme A synthetase ACSM3, mitochondrial; butyrate--CoA ligase 3; butyryl-coenzyme A synthetase 3; middle-chain acyl-CoA synthetase 3; propionate--CoA ligase; protein SA homolog
ACSM4	ACSM4	acyl-CoA synthetase medium chain family member 4	acyl-coenzyme A synthetase ACSM4, mitochondrial
ACSM5	ACSM5	acyl-CoA synthetase medium chain family member 5	acyl-coenzyme A synthetase ACSM5, mitochondrial
ACSM6	ACSM6	acyl-CoA synthetase medium chain family member 6	AMP-binding enzyme; acyl-coenzyme A synthetase ACSM6, mitochondrial
ACSS1	ACSS1	acyl-CoA synthetase short chain family member 1	acetate--CoA ligase 2; acetyl-coenzyme A synthetase 2-like, mitochondrial; propionate--CoA ligase
ACSS2	ACSS2	acyl-CoA synthetase short chain family member 2	acetate thiokinase; acetate-CoA ligase; acetyl-CoA synthetase 1; acetyl-Coenzyme A synthetase 2 (ADP forming); acetyl-coenzyme A synthetase, cytoplasmic; acyl-activating enzyme; cytoplasmic acetyl-coenzyme A synthetase; propionate--CoA ligase
ACSS3	ACSS3	acyl-CoA synthetase short chain family member 3	AMP-binding enzyme, 33217; acetate--CoA ligase 3; acyl-CoA synthetase short-chain family member 3, mitochondrial; propionate--CoA ligase
ACTA1	ACTA1	actin alpha 1, skeletal muscle	actin, alpha skeletal muscle; nemaline myopathy type 3
ACTA2	ACTA2	actin alpha 2, smooth muscle	actin, alpha 2, smooth muscle, aorta; actin, aortic smooth muscle; alpha-cardiac actin; cell growth-inhibiting gene 46 protein
ACTBL2	ACTBL2	actin beta like 2	actin-like protein; beta-actin-like protein 2; kappa-actin
ACTC1	ACTC1	actin alpha cardiac muscle 1	actin, alpha cardiac muscle 1
ACTG2	ACTG2	actin gamma 2, smooth muscle	actin, gamma 2, smooth muscle, enteric; actin, gamma-enteric smooth muscle; actin-like protein; alpha-actin-3
ACTL10	ACTL10	actin like 10	actin-like protein 10
ACTL6A	ACTL6A	actin like 6A	53 kDa BRG1-associated factor A; BAF complex 53 kDa subunit; BAF53; BRG1-associated factor 53A; INO80 complex subunit K; actin-like protein 6A; actin-related protein 4; actin-related protein Baf53a; arpNbeta; hArpN beta
ACTL6B	ACTL6B	actin like 6B	53 kDa BRG1-associated factor B; BRG1-associated factor 53B; actin-like protein 6B; actin-related protein Baf53b; hArpN alpha
ACTL7A	ACTL7A	actin like 7A	actin-like 7-alpha; actin-like protein 7A; testicular secretory protein Li 3
ACTL7B	ACTL7B	actin like 7B	actin-like 7-beta; actin-like protein 7B; testis tissue sperm-binding protein Li 43a
ACTL8	ACTL8	actin like 8	actin like protein; actin-like protein 8; cancer/testis antigen 57
ACTL9	ACTL9	actin like 9	actin-like protein 9; testicular tissue protein Li 15; testicular tissue protein Li 9
ACTMAP	ACTMAP	actin maturation protease	UPF0692 protein C19orf54; actin aminopeptidase ACTMAP; actin maturation protease
ACTN1	ACTN1	actinin alpha 1	F-actin cross-linking protein; actinin 1 smooth muscle; alpha-actinin-1; epididymis secretory sperm binding protein; non-muscle alpha-actinin-1
ACTN2	ACTN2	actinin alpha 2	F-actin cross-linking protein; alpha-actinin skeletal muscle; alpha-actinin-2
ACTN3	ACTN3	actinin alpha 3	F-actin cross-linking protein; alpha-actinin skeletal muscle; alpha-actinin-3
ACTN4	ACTN4	actinin alpha 4	alpha-actinin-4; focal segmental glomerulosclerosis 1; non-muscle alpha-actinin 4
ACTR10	ACTR10	actin related protein 10	actin related protein 10 homolog; actin-related protein 10; actin-related protein 11
ACTR1A	ACTR1A	actin related protein 1A	ARP1 actin related protein 1 homolog A; ARP1 actin-related protein 1 homolog A, centractin alpha; actin-RPV; alpha-centractin; centractin; centrosome-associated actin homolog; epididymis secretory sperm binding protein
ACTR1B	ACTR1B	actin related protein 1B	ARP1 actin related protein 1 homolog B; ARP1 actin-related protein 1 homolog B, centractin beta; beta-centractin; centractin beta
ACTR2	ACTR2	actin related protein 2	ARP2 actin related protein 2 homolog; actin-like protein 2; actin-related protein 2
ACTR3	ACTR3	actin related protein 3	ARP3 actin related protein 3 homolog; actin-like protein 3; actin-related protein 3
ACTR3B	ACTR3B	actin related protein 3B	ARP3 actin related protein 3 homolog B; ARP3-beta; actin-like protein 3B; actin-related protein 3-beta; actin-related protein 3B; actin-related protein ARP4; actin-related protein Arp11
ACTR3C	ACTR3C	actin related protein 3C	ARP3 actin related protein 3 homolog C; actin-related Arp11; actin-related protein 11; actin-related protein 3C
ACTR5	ACTR5	actin related protein 5	ARP5 actin related protein 5 homolog; INO80 complex subunit M; actin-related protein 5; hARP5; sarcoma antigen NY-SAR-16
ACTR6	ACTR6	actin related protein 6	ARP6 actin related protein 6 homolog; actin-related protein 6
ACTR8	ACTR8	actin related protein 8	ARP8 actin related protein 8 homolog; INO80 complex subunit N; actin-related protein 8
ACTRT1	ACTRT1	actin related protein T1	actin-related protein T1
ACTRT2	ACTRT2	actin related protein T2	actin-related protein M2; actin-related protein T2; actin-related protein hArpM2
ACTRT3	ACTRT3	actin related protein T3	actin-related protein M1; actin-related protein T3
ACVR1	ACVR1	activin A receptor type 1	TGF-B superfamily receptor type I; activin A receptor, type I; activin A receptor, type II-like kinase 2; activin receptor type I; activin receptor type-1; activin receptor-like kinase 2; hydroxyalkyl-protein kinase; serine/threonine-protein kinase receptor R1
ACVR1B	ACVR1B	activin A receptor type 1B	activin A receptor, type IB; activin A receptor, type II-like kinase 4; activin receptor type-1B; activin receptor-like kinase 4; serine/threonine-protein kinase receptor R2
ACVR1C	ACVR1C	activin A receptor type 1C	ACTR-IC; ALK-7; activin A receptor, type IC; activin receptor type IC; activin receptor type-1C; activin receptor-like kinase 7
ACVR2A	ACVR2A	activin A receptor type 2A	activin A receptor, type IIA; activin receptor type-2A
ACVR2B	ACVR2B	activin A receptor type 2B	activin A receptor, type IIB; activin receptor type-2B
ACVRL1	ACVRL1	activin A receptor like type 1	TGF-B superfamily receptor type I; activin A receptor type II-like 1; activin A receptor type IL; activin A receptor, type II-like kinase 1; activin receptor type-1-like; serine/threonine-protein kinase receptor R3
ACY1	ABHD14A-ACY1 | ACY1	ABHD14A-ACY1 readthrough | aminoacylase 1	ABHD14A-ACY1 readthrough (NMD candidate); ABHD14A-ACY1 readthrough (non-protein coding) | N-acyl-L-amino-acid amidohydrolase; acylase; aminoacylase-1; epididymis secretory protein Li 5
ACY3	ACY3	aminoacylase 3	HCV core-binding protein 1; N-acyl-aromatic-L-amino acid amidohydrolase (carboxylate-forming); acylase III; aspartoacylase (aminoacylase) 3; aspartoacylase (aminocyclase) 3; aspartoacylase-2; hepatitis C virus core-binding protein 1
ACYP1	ACYP1	acylphosphatase 1	acylphosphatase 1, erythrocyte (common) type; acylphosphatase, erythrocyte isozyme; acylphosphatase, organ-common type isozyme; acylphosphatase-1; acylphosphate phosphohydrolase 1
ACYP2	ACYP2	acylphosphatase 2	acylphosphatase 2, muscle type; acylphosphatase, muscle type isozyme; acylphosphatase-2; acylphosphate phosphohydrolase 2; testicular tissue protein Li 11
ADA	ADA	adenosine deaminase	adenosine aminohydrolase; adenosine deaminase
ADA2	ADA2	adenosine deaminase 2	adenosine deaminase 2; adenosine deaminase CECR1; cat eye syndrome chromosome region, candidate 1; cat eye syndrome critical region protein 1
ADAD1	ADAD1	adenosine deaminase domain containing 1	adenosine deaminase domain containing 1 (testis-specific); adenosine deaminase domain-containing protein 1; testis nuclear RNA-binding protein; testis tissue sperm-binding protein Li 92mP
ADAD2	ADAD2	adenosine deaminase domain containing 2	adenosine deaminase domain-containing protein 2
ADAL	ADAL
ADAM10	ADAM10	ADAM metallopeptidase domain 10	a disintegrin and metalloprotease domain 10; disintegrin and metalloproteinase domain-containing protein 10; kuzbanian protein homolog; mammalian disintegrin-metalloprotease
ADAM11	ADAM11	ADAM metallopeptidase domain 11	ADAM 11; disintegrin and metalloproteinase domain-containing protein 11; metalloproteinase-like, disintegrin-like, and cysteine-rich protein
ADAM12	ADAM12	ADAM metallopeptidase domain 12	disintegrin and metalloproteinase domain-containing protein 12; meltrin-alpha; metalloprotease-disintegrin 12 transmembrane
ADAM15	ADAM15 | ADAM15-EFNA4	ADAM metallopeptidase domain 15 | ADAM15-EFNA4 readthrough	MDC-15; a disintegrin and metalloproteinase domain 15 (metargidin); disintegrin and metalloproteinase domain-containing protein 15; metalloprotease RGD disintegrin protein; metalloproteinase-like, disintegrin-like, and cysteine-rich protein 15 |
ADAM17	ADAM17	ADAM metallopeptidase domain 17	ADAM metallopeptidase domain 18; TNF-alpha convertase; TNF-alpha convertase enzyme; TNF-alpha converting enzyme; a disintegrin and metalloproteinase 17; cartilage snake venom-like protease; disintegrin and metalloproteinase domain-containing protein 17; snake venom-like protease; tumor necrosis factor, alpha, converting enzyme
ADAM18	ADAM18	ADAM metallopeptidase domain 18	a disintegrin and metalloproteinase domain 18; disintegrin and metalloproteinase domain-containing protein 18; transmembrane metalloproteinase-like, disintegrin-like, and cysteine-rich protein III
ADAM19	ADAM19	ADAM metallopeptidase domain 19	a disintegrin and metalloproteinase domain 19 (meltrin beta); disintegrin and metalloproteinase domain-containing protein 19; metalloprotease and disintegrin dendritic antigen marker; metalloprotease-disintegrin meltrin beta
ADAM2	ADAM2	ADAM metallopeptidase domain 2	cancer/testis antigen 15; disintegrin and metalloproteinase domain-containing protein 2; fertilin subunit beta
ADAM20	ADAM20	ADAM metallopeptidase domain 20	ADAM 20; a disintegrin and metalloproteinase domain 20; disintegrin and metalloproteinase domain-containing protein 20
ADAM21	ADAM21	ADAM metallopeptidase domain 21	ADAM metallopeptidase domain 21, preproprotein; a disintegrin and metalloproteinase domain 21; disintegrin and metalloproteinase domain-containing protein 21
ADAM22	ADAM22	ADAM metallopeptidase domain 22	a disintegrin and metalloproteinase domain 22; disintegrin and metalloproteinase domain-containing protein 22; metalloproteinase-disintegrin ADAM22-3; metalloproteinase-like, disintegrin-like, and cysteine-rich protein 2
ADAM23	ADAM23	ADAM metallopeptidase domain 23	disintegrin and metalloproteinase domain-containing protein 23; metalloproteinase-like, disintegrin-like, and cysteine-rich protein 3
ADAM28	ADAM28	ADAM metallopeptidase domain 28	disintegrin and metalloproteinase domain-containing protein 28; epididymal metalloproteinase-like, disintegrin-like, and cysteine-rich protein II; epididymial metalloproteinase-like, disintegrin-like, and cysteine-rich protein II; epididymis secretory sperm binding protein; metalloproteinase-like, disintegrin-like, and cysteine-rich protein-L
ADAM29	ADAM29	ADAM metallopeptidase domain 29	a disintegrin and metalloproteinase domain 29; cancer/testis antigen 73; disintegrin and metalloproteinase domain-containing protein 29; epididymis secretory sperm binding protein; metallaproteinase-disintegrin (ADAM29); testis secretory sperm-binding protein Li 207a
ADAM30	ADAM30	ADAM metallopeptidase domain 30	a disintegrin and metalloproteinase domain 30; disintegrin and metalloproteinase domain-containing protein 30
ADAM32	ADAM32	ADAM metallopeptidase domain 32	a disintegrin and metalloprotease domain 32; a disintegrin and metalloproteinase domain 32; disintegrin and metalloproteinase domain-containing protein 32; metalloproteinase 12-like protein; testicular tissue protein Li 13
ADAM33	ADAM33	ADAM metallopeptidase domain 33	ADAM 33; a disintegrin and metalloprotease 33; a disintegrin and metalloproteinase domain 33; disintegrin and metalloproteinase domain-containing protein 33; disintegrin and reprolysin metalloproteinase family protein
ADAM7	ADAM7	ADAM metallopeptidase domain 7	a disintegrin and metalloproteinase domain 7; disintegrin and metalloproteinase domain-containing protein 7; epididymal apical protein I; epididymis secretory sperm binding protein; sperm maturation-related glycoprotein GP-83
ADAM8	ADAM8	ADAM metallopeptidase domain 8	a disintegrin and metalloproteinase domain 8; cell surface antigen MS2; disintegrin and metalloproteinase domain-containing protein 8; human leukocyte differentiation antigen
ADAM9	ADAM9	ADAM metallopeptidase domain 9	ADAM metallopeptidase domain 9 (meltrin gamma); cellular disintegrin-related protein; cone rod dystrophy 9; disintegrin and metalloproteinase domain-containing protein 9; metalloprotease/disintegrin/cysteine-rich protein 9; myeloma cell metalloproteinase
ADAMDEC1	ADAMDEC1	ADAM like decysin 1	ADAM DEC1; ADAM-like protein decysin-1; a disintegrin and metalloproteinase domain-like protein decysin-1; decysin; disintegrin protease
ADAMTS1	ADAMTS1	ADAM metallopeptidase with thrombospondin type 1 motif 1	A disintegrin and metalloproteinase with thrombospondin motifs 1; ADAM-TS 1; ADAM-TS1; ADAMTS-1; METH-1; a disintegrin-like and metalloprotease (reprolysin type) with thrombospondin type 1 motif, 1; human metalloproteinase with thrombospondin type 1 motifs; metalloprotease and thrombospondin-1
ADAMTS10	ADAMTS10	ADAM metallopeptidase with thrombospondin type 1 motif 10	A disintegrin and metalloproteinase with thrombospondin motifs 10; ADAM-TS 10; a disintegrin-like and metalloprotease (reprolysin type) with thrombospondin type 1 motif, 10; zinc metalloendopeptidase
ADAMTS12	ADAMTS12	ADAM metallopeptidase with thrombospondin type 1 motif 12	A disintegrin and metalloproteinase with thrombospondin motifs 12; ADAM-TS 12; ADAM-TS12; ADAMTS-12; a disintegrin-like and metalloprotease (reprolysin type) with thrombospondin type 1 motif, 12
ADAMTS13	ADAMTS13	ADAM metallopeptidase with thrombospondin type 1 motif 13	A disintegrin and metalloproteinase with thrombospondin motifs 13; a disintegrin-like and metalloprotease (reprolysin type) with thrombospondin type 1 motif, 13; vWF-cleaving protease; von Willebrand factor-cleaving protease
ADAMTS14	ADAMTS14	ADAM metallopeptidase with thrombospondin type 1 motif 14	A disintegrin and metalloproteinase with thrombospondin motifs 14; a disintegrin-like and metalloprotease (reprolysin type) with thrombospondin type 1 motif, 14
ADAMTS15	ADAMTS15	ADAM metallopeptidase with thrombospondin type 1 motif 15	A disintegrin and metalloproteinase with thrombospondin motifs 15; a disintegrin-like and metalloprotease (reprolysin type) with thrombospondin type 1 motif, 15, preproprotein; metalloprotease disintegrin 15 with thrombospondin domains
ADAMTS16	ADAMTS16	ADAM metallopeptidase with thrombospondin type 1 motif 16	A disintegrin and metalloproteinase with thrombospondin motifs 16; ADAM-TS 16; ADAM-TS16; ADAMTS-16; a disintegrin-like and metalloprotease (reprolysin type) with thrombospondin type 1 motif, 16
ADAMTS17	ADAMTS17	ADAM metallopeptidase with thrombospondin type 1 motif 17	A disintegrin and metalloproteinase with thrombospondin motifs 17; a disintegrin-like and metalloprotease (reprolysin type) with thrombospondin type 1 motif, 17
ADAMTS18	ADAMTS18	ADAM metallopeptidase with thrombospondin type 1 motif 18	A disintegrin and metalloproteinase with thrombospondin motifs 18; a disintegrin-like and metalloprotease (reprolysin type) with thrombospondin type 1 motif, 18; a disintegrin-like and metalloprotease (reprolysin type) with thrombospondin type 1 motif, 21; disintegrin and metalloprotease-like protein
ADAMTS19	ADAMTS19	ADAM metallopeptidase with thrombospondin type 1 motif 19	A disintegrin and metalloproteinase with thrombospondin motifs 19; a disintegrin-like and metalloprotease (reprolysin type) with thrombospondin type 1 motif, 19
ADAMTS2	ADAMTS2	ADAM metallopeptidase with thrombospondin type 1 motif 2	A disintegrin and metalloproteinase with thrombospondin motifs 2; a disintegrin-like and metalloprotease (reprolysin type) with thrombospondin type 1 motif, 2; procollagen I N-proteinase; procollagen I/II amino propeptide-processing enzyme; procollagen N-endopeptidase
ADAMTS20	ADAMTS20	ADAM metallopeptidase with thrombospondin type 1 motif 20	A disintegrin and metalloproteinase with thrombospondin motifs 20; a disintegrin-like and metalloprotease (reprolysin type) with thrombospondin type 1 motif, 20
ADAMTS3	ADAMTS3	ADAM metallopeptidase with thrombospondin type 1 motif 3	A disintegrin and metalloproteinase with thrombospondin motifs 3; ADAM-TS 3; ADAM-TS3; ADAMTS-3; PC II-NP; a disintegrin-like and metalloprotease (reprolysin type) with thrombospondin type 1 motif, 3; procollagen II N-proteinase; procollagen II amino propeptide-processing enzyme; zinc metalloendopeptidase
ADAMTS4	ADAMTS4	ADAM metallopeptidase with thrombospondin type 1 motif 4	A disintegrin and metalloproteinase with thrombospondin motifs 4; ADAM-TS 4; ADAM-TS4; a disintegrin-like and metalloprotease (reprolysin type) with thrombospondin type 1 motif, 4; aggrecanase-1; epididymis secretory sperm binding protein
ADAMTS5	ADAMTS5	ADAM metallopeptidase with thrombospondin type 1 motif 5	A disintegrin and metalloproteinase with thrombospondin motifs 5; a disintegrin and metalloproteinase with thrombospondin motifs 11; a disintegrin-like and metalloprotease (reprolysin type) with thrombospondin type 1 motif, 5 (aggrecanase-2); aggrecanase-2
ADAMTS6	ADAMTS6	ADAM metallopeptidase with thrombospondin type 1 motif 6	A disintegrin and metalloproteinase with thrombospondin motifs 6; a disintegrin-like and metalloprotease (reprolysin type) with thrombospondin type 1 motif, 6
ADAMTS7	ADAMTS7	ADAM metallopeptidase with thrombospondin type 1 motif 7	A disintegrin and metalloproteinase with thrombospondin motifs 7; COMPase; a disintegrin and metalloprotease with thrombospondin motifs-7 preproprotein; a disintegrin-like and metalloprotease (reprolysin type) with thrombospondin type 1 motif, 7
ADAMTS8	ADAMTS8	ADAM metallopeptidase with thrombospondin type 1 motif 8	A disintegrin and metalloproteinase with thrombospondin motifs 8; ADAMTS-8; METH-2; METH-8; a disintegrin-like and metalloprotease (reprolysin type) with thrombospondin type 1 motif, 8
ADAMTS9	ADAMTS9	ADAM metallopeptidase with thrombospondin type 1 motif 9	A disintegrin and metalloproteinase with thrombospondin motifs 9; a disintegrin-like and metalloprotease (reprolysin type) with thrombospondin type 1 motif, 9
ADAMTSL1	ADAMTSL1	ADAMTS like 1	ADAM-TS related protein 1; ADAMTS-like protein 1; punctin-1
ADAMTSL2	ADAMTSL2	ADAMTS like 2	ADAMTS-like protein 2
ADAMTSL3	ADAMTSL3	ADAMTS like 3	ADAMTS-like protein 3; a disintegrin-like and metalloprotease domain with thrombospondin type I motifs-like 3; punctin-2
ADAMTSL4	ADAMTSL4	ADAMTS like 4	ADAMTS-like protein 4; thrombospondin repeat-containing protein 1
ADAMTSL5	ADAMTSL5	ADAMTS like 5	ADAMTS-like protein 5; ADAMTSL-5; thrombospondin type-1 domain-containing protein 6; thrombospondin, type I, domain containing 6
ADAP1	ADAP1	ArfGAP with dual PH domains 1	arf-GAP with dual PH domain-containing protein 1; centaurin-alpha; centaurin-alpha-1; cnt-a1; putative MAPK-activating protein PM25
ADAP2	ADAP2	ArfGAP with dual PH domains 2	arf-GAP with dual PH domain-containing protein 2; centaurin beta; centaurin-alpha 2 protein
ADAR	ADAR	adenosine deaminase RNA specific	136 kDa double-stranded RNA-binding protein; adenosine deaminase acting on RNA 1-A; double-stranded RNA-specific adenosine deaminase; dsRNA adenosine deaminase; dsRNA adeonosine deaminase; interferon-induced protein 4; interferon-inducible protein 4
ADARB1	ADARB1	adenosine deaminase RNA specific B1	RNA editing deaminase 1; RNA-editing enzyme 1; adenosine deaminase, RNA-specific, B1 (homolog of rat RED1); double-stranded RNA-specific editase 1; dsRNA adenosine deaminase DRADA2
ADARB2	ADARB2	adenosine deaminase RNA specific B2 (inactive)	RED2 homolog; RNA-dependent adenosine deaminase 3; RNA-editing deaminase 2; RNA-editing enzyme 2; adenosine deaminase, RNA-specific, B2 (RED1 homolog rat); adenosine deaminase, RNA-specific, B2 (RED2 homolog rat); adenosine deaminase, RNA-specific, B2 (non-functional); double-stranded RNA-specific editase B2; dsRNA adenosine deaminase B2; homolog of rat BLUE
ADAT1	ADAT1	adenosine deaminase tRNA specific 1	adenosine deaminase acting on tRNA; tRNA-specific adenosine deaminase 1; tRNA-specific adenosine-37 deaminase
ADAT2	ADAT2	adenosine deaminase tRNA specific 2	adenosine deaminase, tRNA-specific 2, TAD2 homolog; deaminase domain containing 1; deaminase domain-containing protein 1; tRNA-specific adenosine deaminase 2; tRNA-specific adenosine deaminase 2 homolog; tRNA-specific adenosine-34 deaminase subunit ADAT2
ADAT3	ADAT3	adenosine deaminase tRNA specific 3	adenosine deaminase, tRNA-specific 3, TAD3 homolog; probable inactive tRNA-specific adenosine deaminase-like protein 3; tRNA-specific adenosine-34 deaminase subunit ADAT3
ADCK1	ADCK1	aarF domain containing kinase 1	aarF domain-containing protein kinase 1
ADCK2	ADCK2	aarF domain containing kinase 2	putative ubiquinone biosynthesis protein AarF; uncharacterized aarF domain-containing protein kinase 2
ADCK5	ADCK5	aarF domain containing kinase 5	uncharacterized aarF domain-containing protein kinase 5
ADCY1	ADCY1	adenylate cyclase 1	3',5'-cyclic AMP synthetase; ATP pyrophosphate-lyase 1; Ca(2+)/calmodulin-activated adenylyl cyclase; adenyl cyclase; adenylate cyclase 1 (brain); adenylate cyclase type 1; adenylate cyclase type I; adenylyl cyclase 1; adenylyl cyclase subtype 1
ADCY10	ADCY10	adenylate cyclase 10	3',5'-cyclic AMP synthetase; AH-related protein; ATP pyrophosphate-lyase; adenylate cyclase 10, soluble; adenylate cyclase type 10; epididymis secretory sperm binding protein Li 7a; germ cell soluble adenylyl cyclase; testicular soluble adenylyl cyclase (SAC)
ADCY2	ADCY2	adenylate cyclase 2	3',5'-cyclic AMP synthetase; ATP pyrophosphate-lyase 2; adenylate cyclase 2 (brain); adenylate cyclase II; adenylate cyclase type 2; adenylate cyclase type II; adenylyl cyclase 2; type II adenylate cyclase
ADCY3	ADCY3	adenylate cyclase 3	ATP pyrophosphate-lyase 3; adenylate cyclase type 3; adenylate cyclase type III; adenylate cyclase, olfactive type; adenylyl cyclase 3; adenylyl cyclase, type III
ADCY4	ADCY4	adenylate cyclase 4	ATP pyrophosphate-lyase 4; adenylate cyclase type 4; adenylate cyclase type IV; adenylyl cyclase 4
ADCY5	ADCY5	adenylate cyclase 5	ATP pyrophosphate-lyase 5; adenylate cyclase type 5; adenylate cyclase type V; adenylyl cyclase 5; epididymis secretory sperm binding protein
ADCY6	ADCY6	adenylate cyclase 6	ATP pyrophosphate-lyase 6; adenylate cyclase type 6; adenylate cyclase type VI; ca(2+)-inhibitable adenylyl cyclase
ADCY7	ADCY7	adenylate cyclase 7	ATP pyrophosphate-lyase 7; adenylate cyclase type 7; adenylate cyclase type VII; adenylyl cyclase 7
ADCY8	ADCY8	adenylate cyclase 8	ATP pyrophosphate-lyase 8; HEL-S-172mP; adenylate cyclase 8 (brain); adenylate cyclase type 8; adenylate cyclase type VIII; adenylyl cyclase 8; adenylyl cyclase-8, brain; ca(2+)/calmodulin-activated adenylyl cyclase; epididymis secretory sperm binding protein Li 172mP
ADCY9	ADCY9	adenylate cyclase 9	ATP pyrophosphate-lyase 9; adenylate cyclase type 9; adenylate cyclase type IX; adenylyl cyclase 9; type IX ATP pyrophosphate-lyase
ADCYAP1	ADCYAP1	adenylate cyclase activating polypeptide 1	adenylate cyclase activating polypeptide 1 (pituitary); pituitary adenylate cyclase-activating polypeptide; prepro-PACAP
ADCYAP1R1	ADCYAP1R1	ADCYAP receptor type I	PAC1 receptor; PACAP receptor 1; PACAP type I receptor; PACAP-R1; adenylate cyclase activating polypeptide 1 (pituitary) receptor type I; pituitary adenylate cyclase activating polypeptide 1 receptor type I Hiphop; pituitary adenylate cyclase-activating polypeptide type 1 receptor; pituitary adenylate cyclase-activating polypeptide type I receptor
ADD1	ADD1	adducin 1	adducin 1 (alpha); alpha-adducin; alpha-adducin 1; erythrocyte adducin alpha subunit
ADD2	ADD2	adducin 2	adducin 2 (beta); beta-adducin; erythrocyte adducin subunit beta
ADD3	ADD3	adducin 3	adducin 3 (gamma); adducin-like protein 70; gamma-adducin
ADGB	ADGB	androglobin	androglobin; calpain-7-like protein
ADGRA1	ADGRA1	adhesion G protein-coupled receptor A1	G-protein coupled receptor 123; adhesion G protein-coupled receptor A1; probable G-protein coupled receptor 123
ADGRA2	ADGRA2	adhesion G protein-coupled receptor A2	G-protein coupled receptor 124; adhesion G protein-coupled receptor A2; tumor endothelial marker 5
ADGRA3	ADGRA3	adhesion G protein-coupled receptor A3	G-protein coupled receptor 125; adhesion G protein-coupled receptor A3; probable G-protein coupled receptor 125
ADGRB1	ADGRB1	adhesion G protein-coupled receptor B1	adhesion G protein-coupled receptor B1; brain-specific angiogenesis inhibitor 1
ADGRB2	ADGRB2	adhesion G protein-coupled receptor B2	adhesion G protein-coupled receptor B2; brain-specific angiogenesis inhibitor 2
ADGRB3	ADGRB3	adhesion G protein-coupled receptor B3	adhesion G protein-coupled receptor B3; brain-specific angiogenesis inhibitor 3; dJ91B17.1 (brain-specific angiogenesis inhibitor 3)
ADGRD1	ADGRD1	adhesion G protein-coupled receptor D1	G-protein coupled receptor 133; G-protein coupled receptor PGR25; adhesion G-protein coupled receptor D1; probable G-protein coupled receptor 133
ADGRD2	ADGRD2	adhesion G protein-coupled receptor D2	G protein-coupled receptor PGR24; G-protein coupled receptor 144; G-protein coupled receptor GPR144; adhesion G protein-coupled receptor D2; adhesion G-protein coupled receptor D2
ADGRE1	ADGRE1	adhesion G protein-coupled receptor E1	EGF-like module receptor 1; EGF-like module-containing mucin-like hormone receptor-like 1; EMR1 hormone receptor; adhesion G protein-coupled receptor E1; egf-like module containing, mucin-like, hormone receptor-like 1; egf-like module containing, mucin-like, hormone receptor-like sequence 1
ADGRE2	ADGRE2	adhesion G protein-coupled receptor E2	CD97 antigen; EGF-like module-containing mucin-like hormone receptor-like 2; Leukocyte antigen CD97; adhesion G protein-coupled receptor E2; egf-like module containing, mucin-like, hormone receptor-like 2
ADGRE3	ADGRE3	adhesion G protein-coupled receptor E3	EGF-like module receptor 3; EGF-like module-containing mucin-like hormone receptor-like 3; adhesion G protein-coupled receptor E3; egf-like module containing, mucin-like, hormone receptor-like 3; egf-like module-containing mucin-like receptor 3
ADGRE5	ADGRE5	adhesion G protein-coupled receptor E5	CD97 molecule; adhesion G protein-coupled receptor E5; leukocyte antigen CD97; seven transmembrane helix receptor; seven-span transmembrane protein; seven-transmembrane, heterodimeric receptor associated with inflammation
ADGRF1	ADGRF1	adhesion G protein-coupled receptor F1	G protein-coupled receptor 110; G protein-coupled receptor PGR19; G-protein coupled receptor KPG_012; adhesion G-protein coupled receptor F1; probable G-protein coupled receptor 110; seven transmembrane helix receptor
ADGRF3	ADGRF3	adhesion G protein-coupled receptor F3	G protein-coupled receptor 113; G protein-coupled receptor PGR23; adhesion G-protein coupled receptor F3; probable G-protein coupled receptor 113; seven transmembrane helix receptor
ADGRF4	ADGRF4	adhesion G protein-coupled receptor F4	G-protein coupled receptor PGR18; adhesion G protein-coupled receptor F4; probable G-protein coupled receptor 115; seven transmembrane helix receptor
ADGRF5	ADGRF5	adhesion G protein-coupled receptor F5	G-protein coupled receptor 116; Ig-Hepta homolog; adhesion G protein-coupled receptor F5; probable G-protein coupled receptor 116
ADGRG1	ADGRG1	adhesion G protein-coupled receptor G1	7-transmembrane protein with no EGF-like N-terminal domains-1; G protein-coupled receptor 56; adhesion G-protein coupled receptor G1; testicular tissue protein Li 77
ADGRG2	ADGRG2	adhesion G protein-coupled receptor G2	G protein-coupled receptor 64; G protein-coupled receptor, epididymis-specific (seven transmembrane family); adhesion G-protein coupled receptor G2; epididymal protein 6; human epididymis-specific protein 6
ADGRG3	ADGRG3	adhesion G protein-coupled receptor G3	G protein-coupled receptor 97; G-protein coupled receptor PGR26; adhesion G protein-coupled receptor G3; probable G-protein coupled receptor 97
ADGRG4	ADGRG4	adhesion G protein-coupled receptor G4	G protein-coupled receptor 112; adhesion G-protein coupled receptor G4; probable G-protein coupled receptor 112
ADGRG5	ADGRG5	adhesion G protein-coupled receptor G5	G protein-coupled receptor 114; G protein-coupled receptor PGR27; adhesion G-protein coupled receptor G5; probable G-protein coupled receptor 114
ADGRG6	ADGRG6	adhesion G protein-coupled receptor G6	G-protein coupled receptor 126; HBV PreS1-transactivated protein 2; adhesion G-protein coupled receptor G6; developmentally regulated G-protein-coupled receptor; vascular-inducible G protein-coupled receptor
ADGRG7	ADGRG7	adhesion G protein-coupled receptor G7	G-protein coupled receptor 128; adhesion G-protein coupled receptor G7
ADGRL1	ADGRL1	adhesion G protein-coupled receptor L1	CIRL-1; adhesion G protein-coupled receptor L1; calcium-independent alpha-latrotoxin receptor 1; latrophilin-1; lectomedin-2
ADGRL2	ADGRL2	adhesion G protein-coupled receptor L2	adhesion G protein-coupled receptor L2; calcium-independent alpha-latrotoxin receptor 2; latrophilin homolog 1; latrophilin-2; lectomedin-1
ADGRL3	ADGRL3	adhesion G protein-coupled receptor L3	adhesion G protein-coupled receptor L3; calcium-independent alpha-latrotoxin receptor 3; latrophilin homolog 3 (cow); latrophilin-3; lectomedin 3
ADGRL4	ADGRL4	adhesion G protein-coupled receptor L4	EGF, latrophilin and seven transmembrane domain containing 1; EGF, latrophilin and seven transmembrane domain-containing protein 1; EGF-TM7-latrophilin-related protein; adhesion G protein-coupled receptor L4
ADGRV1	ADGRV1	adhesion G protein-coupled receptor V1	G-protein coupled receptor 98; adhesion G-protein coupled receptor V1; monogenic audiogenic seizure susceptibility protein 1 homolog; usher syndrome type-2C protein; very large G-protein coupled receptor 1
ADH1A	ADH1A	alcohol dehydrogenase 1A (class I), alpha polypeptide	ADH, alpha subunit; alcohol dehydrogenase 1 (class I), alpha polypeptide; alcohol dehydrogenase 1A; alcohol dehydrogenase subunit alpha; aldehyde reductase
ADH1B	ADH1B	alcohol dehydrogenase 1B (class I), beta polypeptide	ADH, beta subunit; alcohol dehydrogenase 2 (class I), beta polypeptide; alcohol dehydrogenase subunit beta; aldehyde reductase; all-trans-retinol dehydrogenase [NAD(+)] ADH1B; epididymis secretory protein Li 117
ADH1C	ADH1C	alcohol dehydrogenase 1C (class I), gamma polypeptide	ADH, gamma subunit; alcohol dehydrogenase 1C; alcohol dehydrogenase 3 (class I), gamma polypeptide; aldehyde reductase
ADH4	ADH4	alcohol dehydrogenase 4 (class II), pi polypeptide	alcohol dehydrogenase 2; alcohol dehydrogenase class II pi chain; aldehyde reductase; all-trans-retinol dehydrogenase [NAD(+)] ADH4; epididymis secretory protein Li 4
ADH5	ADH5	alcohol dehydrogenase 5 (class III), chi polypeptide	S-(hydroxymethyl)glutathione dehydrogenase; S-nitrosoglutathione reductase; alcohol dehydrogenase (class III), chi polypeptide; alcohol dehydrogenase class chi chain; alcohol dehydrogenase class-3; alcohol dehydrogenase class-III; epididymis secretory sperm binding protein Li 60p; formaldehyde dehydrogenase; glutathione-dependent formaldehyde dehydrogenase
ADH6	ADH6	alcohol dehydrogenase 6 (class V)	alcohol dehydrogenase 6; aldehyde reductase
ADH7	ADH7	alcohol dehydrogenase 7 (class IV), mu or sigma polypeptide	alcohol dehydrogenase VII; alcohol dehydrogenase class 4 mu/sigma chain; alcohol dehydrogenase class IV mu/sigma chain; alcohol dehydrogenase-7; all-trans-retinol dehydrogenase [NAD(+)] ADH7; class IV sigma-1 alcohol dehydrogenase; class IV sigmasigma alcohol dehydrogenase; gastric alcohol dehydrogenase; omega-hydroxydecanoate dehydrogenase ADH7; retinol dehydrogenase
ADHFE1	ADHFE1	alcohol dehydrogenase iron containing 1	Fe-containing alcohol dehydrogenase 1; alcohol dehydrogenase 8; alcohol dehydrogenase iron-containing protein 1; hydroxyacid-oxoacid transhydrogenase, mitochondrial
ADI1	ADI1	acireductone dioxygenase 1	MT1-MMP cytoplasmic tail-binding protein-1; acireductone dioxygenase; acireductone dioxygenase (Fe(2+)-requiring); acireductone dioxygenase (Ni(2+)-requiring); membrane-type 1 matrix metalloproteinase cytoplasmic tail binding protein-1; submergence induced protein 2; submergence-induced protein-like factor
ADIG	ADIG	adipogenin	adipogenesis associated; adipogenin; small adipocyte factor 1 (SMAF1)
ADIPOQ	ADIPOQ	adiponectin, C1Q and collagen domain containing	30 kDa adipocyte complement-related protein; adipocyte complement-related 30 kDa protein; adiponectin; adipose most abundant gene transcript 1 protein; adipose specific collagen-like factor; gelatin-binding protein 28
ADIPOR1	ADIPOR1	adiponectin receptor 1	adiponectin receptor protein 1; progestin and adipoQ receptor family member 1; progestin and adipoQ receptor family member I
ADIPOR2	ADIPOR2	adiponectin receptor 2	adiponectin receptor protein 2; progestin and adipoQ receptor family member 2; progestin and adipoQ receptor family member II
ADIRF	ADIRF	adipogenesis regulatory factor	adipogenesis factor rich in obesity; adipogenesis regulatory factor; adipose most abundant gene transcript 2 protein; adipose specific 2; adipose-specific protein 2
ADISSP	ADISSP	adipose secreted signaling protein	UPF0687 protein C20orf27; adipose-secreted signaling protein
ADK	ADK	adenosine kinase	adenosine 5'-phosphotransferase; adenosine kinase; testicular tissue protein Li 14
ADM	ADM	adrenomedullin	preproadrenomedullin; pro-adrenomedullin; proadrenomedullin N-20 terminal peptide
ADM2	ADM2	adrenomedullin 2	intermedin; protein ADM2
ADM5	ADM5	adrenomedullin 5 (putative)	adrenomedullin 5 homolog (pig); putative adrenomedullin-5-like protein
ADNP	ADNP	activity dependent neuroprotector homeobox	ADNP homeobox 1; activity-dependent neuroprotective protein; activity-dependent neuroprotector; activity-dependent neuroprotector homeobox protein
ADNP2	ADNP2	ADNP homeobox 2	ADNP homeobox protein 2; activity-dependent neuroprotector homeobox protein 2; zinc finger protein 508
ADO	ADO	2-aminoethanethiol dioxygenase	2-aminoethanethiol (cysteamine) dioxygenase; 2-aminoethanethiol dioxygenase; cysteamine (2-aminoethanethiol) dioxygenase (ADO); cysteamine dioxygenase
ADORA1	ADORA1	adenosine A1 receptor	adenosine receptor A1
ADORA2A	ADORA2A | SPECC1L-ADORA2A	adenosine A2a receptor | SPECC1L-ADORA2A readthrough (NMD candidate)	adenosine receptor A2a; adenosine receptor subtype A2a |
ADORA2B	ADORA2B	adenosine A2b receptor	adenosine receptor A2b
ADORA3	ADORA3	adenosine A3 receptor	adenosine receptor A3
ADPGK	ADPGK	ADP dependent glucokinase	ADP-dependent glucokinase; ATP-dependent glucokinase; rbBP-35
ADPRH	ADPRH	ADP-ribosylarginine hydrolase	ADP-ribose-L-arginine cleaving enzyme; ADP-ribosylarginine hydrolase; ADP-ribosylhydrolase ARH1; [Protein ADP-ribosylarginine] hydrolase
ADPRHL1	ADPRHL1	ADP-ribosylhydrolase like 1	ADP-ribosyl-hydrolase; ADP-ribosylarginine hydrolase like 1; ADP-ribosylhydrolase 2; ADP-ribosylhydrolase-like protein 1; [Protein ADP-ribosylarginine] hydrolase-like protein 1; inactive ADP-ribosyltransferase ARH2
ADPRM	ADPRM	ADP-ribose/CDP-alcohol diphosphatase, manganese dependent	ADP-ribose/CDP-alcohol pyrophosphatase; ADPRibase-Mn; CDP-choline phosphohydrolase; manganese-dependent ADP-ribose/CDP-alcohol diphosphatase
ADPRS	ADPRS	ADP-ribosylserine hydrolase	ADP-ribose glycohydrolase ARH3; ADP-ribosylarginine hydrolase like 2; ADP-ribosylhydrolase 3; ADP-ribosylhydrolase ARH3; ADP-ribosylhydrolase like 2; O-acetyl-ADP-ribose deacetylase ARH3; [Protein ADP-ribosylarginine] hydrolase-like protein 2; [Protein ADP-ribosylserine] hydrolase; poly(ADP-ribose) glycohydrolase ARH3; protein ADP-ribosylarginine hydrolase-like protein 2
ADRA1A	ADRA1A	adrenoceptor alpha 1A	G protein coupled receptor; alpha-1A adrenergic receptor; alpha-1A adrenoceptor; alpha-1A adrenoreceptor; alpha-1C adrenergic receptor
ADRA1B	ADRA1B	adrenoceptor alpha 1B	adrenergic, alpha-1B-, receptor; alpha-1B adrenergic receptor; alpha-1B adrenoceptor; alpha-1B adrenoreceptor
ADRA1D	ADRA1D	adrenoceptor alpha 1D	adrenergic, alpha -1D-, receptor; adrenergic, alpha-1A-, receptor; alpha-1A adrenergic receptor; alpha-1D adrenergic receptor; alpha-1D adrenoceptor; alpha-1D adrenoreceptor; alpha-adrenergic receptor 1a
ADRA2A	ADRA2A	adrenoceptor alpha 2A	adrenergic, alpha-2A-, receptor; alpha-2 adrenergic receptor subtype C10; alpha-2-adrenergic receptor, platelet type; alpha-2A adrenergic receptor; alpha-2A adrenoceptor; alpha-2A adrenoreceptor; alpha-2AAR subtype C10
ADRA2B	ADRA2B	adrenoceptor alpha 2B	ADRA2B adrenergic, alpha-2B-, receptor; G-protein coupled receptor; alpha-2 adrenergic receptor subtype C2; alpha-2-adrenergic receptor-like 1; alpha-2B adrenergic receptor; alpha-2B adrenoreceptor
ADRA2C	ADRA2C	adrenoceptor alpha 2C	adrenergic, alpha-2C-, receptor; alpha-2 adrenergic receptor subtype C4; alpha-2C adrenergic receptor; alpha-2C adrenoceptor; alpha-2C adrenoreceptor; alpha-2CAR; alpha2-AR-C4
ADRB1	ADRB1	adrenoceptor beta 1	adrenergic, beta-1-, receptor; beta-1 adrenergic receptor; beta-1 adrenoceptor; beta-1 adrenoreceptor
ADRB2	ADRB2	adrenoceptor beta 2	adrenergic, beta-2-, receptor, surface; adrenoceptor beta 2 surface; beta-2 adrenergic receptor; beta-2 adrenoceptor; beta-2 adrenoreceptor; catecholamine receptor
ADRB3	ADRB3	adrenoceptor beta 3	adrenergic, beta-3-, receptor; beta-3 adrenergic receptor; beta-3 adrenoceptor; beta-3 adrenoreceptor
ADRM1	ADRM1	ADRM1 26S proteasome ubiquitin receptor	110 kDa cell membrane glycoprotein; M(r) 110,000 surface antigen; adhesion regulating molecule 1; proteasomal ubiquitin receptor ADRM1; proteasome regulatory particle non-ATPase 13; proteasome ubiquitin receptor; rpn13 homolog
ADSL	ADSL	adenylosuccinate lyase	adenylosuccinase; adenylosuccinate lyase
ADSS1	ADSS1	adenylosuccinate synthase 1	AMPSase 1; IMP--aspartate ligase 1; M-type adenylosuccinate synthetase; adSS 1; adenylosuccinate synthase like 1; adenylosuccinate synthetase isozyme 1; adenylosuccinate synthetase, basic isozyme; adenylosuccinate synthetase, muscle isozyme; adenylosuccinate synthetase-like 1
ADSS2	ADSS2	adenylosuccinate synthase 2	AMPSase 2; IMP--aspartate ligase 2; L-type adenylosuccinate synthetase; adenylosuccinate synthetase (Ade(-)H-complementing); adenylosuccinate synthetase isozyme 2; adenylosuccinate synthetase, acidic isozyme; adenylosuccinate synthetase, liver isozyme; epididymis secretory sperm binding protein
ADTRP	ADTRP	androgen dependent TFPI regulating protein	FAHFA hydrolase ADTRP; androgen-dependent TFPI-regulating protein; androgen-dependent TPF1-regulating protein; fatty acid esters of hydroxy fatty acids hydrolase ADTRP
AEBP1	AEBP1	AE binding protein 1	adipocyte enhancer-binding protein 1; aortic carboxypeptidase-like protein
AEBP2	AEBP2	AE binding protein 2	AE(adipocyte enhancer)-binding protein 2; adipocyte enhancer-binding protein 2; zinc finger protein AEBP2
AEN	AEN	apoptosis enhancing nuclease	apoptosis-enhancing nuclease; interferon stimulated exonuclease gene 20kDa-like 1; interferon-stimulated 20 kDa exonuclease-like 1
AFAP1	AFAP1	actin filament associated protein 1	110 kDa actin filament-associated protein; actin filament-associated protein 1; actin filament-associated protein, 110 kDa
AFAP1L1	AFAP1L1	actin filament associated protein 1 like 1	AFAP1-like protein 1; actin filament-associated protein 1-like 1
AFAP1L2	AFAP1L2	actin filament associated protein 1 like 2	AFAP1-like protein 2; CTB-1144G6.6; actin filament-associated protein 1-like 2
AFDN	AFDN	afadin, adherens junction formation factor	ALL1-fused gene from chromosome 6 protein; afadin; myeloid/lymphoid or mixed-lineage leukemia (trithorax homolog, Drosophila); translocated to, 4; myeloid/lymphoid or mixed-lineage leukemia; translocated to, 4; protein AF-6
AFF1	AFF1	ALF transcription elongation factor 1	AF4/FMR2 family member 1; ALL1-fused gene from chromosome 4 protein; KMT2A/AFF1 fusion protein; myeloid/lymphoid or mixed-lineage leukemia (trithorax homolog, Drosophila); translocated to, 2; pre-B-cell monocytic leukemia partner 1; proto-oncogene AF4
AFF2	AFF2	ALF transcription elongation factor 2	AF4/FMR2 family member 2; protein FMR-2
AFF3	AFF3	ALF transcription elongation factor 3	AF4/FMR2 family member 3; MLLT2-related protein; lymphoid nuclear protein 4; lymphoid nuclear protein related to AF4; protein LAF-4
AFF4	AFF4	ALF transcription elongation factor 4	AF4/FMR2 family member 4; ALL1-fused gene from chromosome 5q31 protein; major CDK9 elongation factor-associated protein
AFG1L	AFG1L	AFG1 like ATPase	AFG1-like ATPase; ATPase family gene 1 homolog; CG8520 gene product; lactation elevated 1; lactation elevated protein 1
AFG2A	AFG2A	AFG2 AAA ATPase homolog A	ATPase family gene 2 homolog; ATPase family gene 2 protein homolog A; ATPase family protein 2 homolog; ribosome biogenesis protein SPATA5; spermatogenesis associated 5; spermatogenesis associated factor SPAF; spermatogenesis-associated factor protein; spermatogenesis-associated protein 5
AFG2B	AFG2B	AFG2 AAA ATPase homolog B	ATPase family gene 2 protein homolog B; ribosome biogenesis protein SPATA5L1; spermatogenesis associated 5 like 1; spermatogenesis-associated protein 5-like protein 1
AFG3L2	AFG3L2	AFG3 like matrix AAA peptidase subunit 2	AFG3 ATPase family gene 3-like 2; AFG3 ATPase family member 3-like 2; AFG3 like AAA ATPase 2; AFG3-like protein 2; ATPase family gene 3, yeast; mitochondrial inner membrane m-AAA protease component AFG3L2; paraplegin-like protein
AFM	AFM	afamin	afamin; alpha-Alb; alpha-albumin; vitamin E binding protein
AFMID	AFMID	arylformamidase	KFase; N-formylkynurenine formamidase; kynurenine formamidase; probable arylformamidase
AFP	AFP	alpha fetoprotein	alpha-1-fetoprotein; alpha-fetoglobulin; alpha-fetoprotein
AFTPH	AFTPH	aftiphilin	aftiphilin; aftiphilin protein
AGA	AGA	aspartylglucosaminidase	N(4)-(beta-N-acetylglucosaminyl)-L-asparaginase; N4-(N-acetyl-beta-glucosaminyl)-L-asparagine amidase; aspartylglucosylamine deaspartylase; glycosylasparaginase
AGAP1	AGAP1	ArfGAP with GTPase domain, ankyrin repeat and PH domain 1	Arf GAP with GTP-binding protein-like, ANK repeat and PH domains 1; GTP-binding and GTPase-activating protein 1; arf-GAP with GTPase, ANK repeat and PH domain-containing protein 1; centaurin, gamma 2
AGAP2	AGAP2	ArfGAP with GTPase domain, ankyrin repeat and PH domain 2	Arf GAP with GTP-binding protein-like, ANK repeat and PH domains 2; GTP-binding and GTPase activating protein 2; arf-GAP with GTPase, ANK repeat and PH domain-containing protein 2; centaurin, gamma 1; phosphatidylinositol 3-kinase enhancer; phosphoinositide 3-kinase enhancer
AGAP3	AGAP3	ArfGAP with GTPase domain, ankyrin repeat and PH domain 3	CRAM-associated GTPase; CRMP (collapsin response mediator protein) associated; MR1-interacting protein; arf-GAP with GTPase, ANK repeat and PH domain-containing protein 3; centaurin-gamma-3
AGAP4	AGAP1 | AGAP10P | AGAP11 | AGAP12P | AGAP13P | AGAP14P | AGAP4 | AGAP5 | AGAP6 | AGAP7P | AGAP9 | BMS1P2-AGAP9 | BMS1P4-AGAP5 | PARGP1-AGAP4 | TIMM23B-AGAP6	ArfGAP with GTPase domain, ankyrin repeat and PH domain 1 | | ArfGAP with GTPase domain, ankyrin repeat and PH domain 11 | | ArfGAP with GTPase domain, ankyrin repeat and PH domain 13, pseudogene | ArfGAP with GTPase domain, ankyrin repeat and PH domain 14, pseudogene | ArfGAP with GTPase domain, ankyrin repeat and PH domain 4 | ArfGAP with GTPase domain, ankyrin repeat and PH domain 5 | ArfGAP w…	Arf GAP with GTP-binding protein-like, ANK repeat and PH domains 1; GTP-binding and GTPase-activating protein 1; arf-GAP with GTPase, ANK repeat and PH domain-containing protein 1; centaurin, gamma 2 | | ankyrin repeat and GTPase domain Arf GTPase activating protein 11; arf-GAP with GTPase, ANK repeat and PH domain-containing protein 11 | | centaurin, gamma-like family, member 9 pseudogene; bA548…
AGAP5	AGAP10P | AGAP5 | AGAP6	| ArfGAP with GTPase domain, ankyrin repeat and PH domain 5 | ArfGAP with GTPase domain, ankyrin repeat and PH domain 6	| AGAP-5; arf-GAP with GTPase, ANK repeat and PH domain-containing protein 5; centaurin, gamma-like family, member 2 | arf-GAP with GTPase, ANK repeat and PH domain-containing protein 6; centaurin-gamma-like family member 3
AGAP6	AGAP10P | AGAP12P | AGAP4 | AGAP5 | AGAP6 | AGAP7P | AGAP9 | TIMM23B-AGAP6	| | ArfGAP with GTPase domain, ankyrin repeat and PH domain 4 | ArfGAP with GTPase domain, ankyrin repeat and PH domain 5 | ArfGAP with GTPase domain, ankyrin repeat and PH domain 6 | ArfGAP with GTPase domain, ankyrin repeat and PH domain 7, pseudogene | ArfGAP with GTPase domain, ankyrin repeat and PH domain 9 | TIMM23B-AGAP6 readthrough (NMD candidate)	| | ARF GTPase-activating protein; ArfGAP with GTPase domain, ankyrin repeat and PH domain 8; arf-GAP with GTPase, ANK repeat and PH domain-containing protein 4; arf-GAP with GTPase, ANK repeat and PH domain-containing protein 8; centaurin, gamma-like family, member 1; centaurin, gamma-like family, member 5 | AGAP-5; arf-GAP with GTPase, ANK repeat and PH domain-containing protein 5; centaurin, g…
AGBL1	AGBL1	AGBL carboxypeptidase 1	ATP/GTP binding protein like 1; cytosolic carboxypeptidase 4; protein deglutamylase CCP4
AGBL2	AGBL2	AGBL carboxypeptidase 2	ATP/GTP binding protein like 2; cytoplasmic carboxypeptidase 2; cytosolic carboxypeptidase 2; protein deglutamylase CCP2; testis tissue sperm-binding protein Li 96mP
AGBL3	AGBL3	AGBL carboxypeptidase 3	ATP/GTP binding protein like 3; cytosolic carboxypeptidase 3; protein deglutamylase CCP3
AGBL4	AGBL4	AGBL carboxypeptidase 4	ATP/GTP binding protein like 4; cytosolic carboxypeptidase 6; protein deglutamylase CCP6
AGBL5	AGBL5	AGBL carboxypeptidase 5	ATP/GTP binding protein like 5; cytosolic carboxypeptidase 5; cytosolic carboxypeptidase-like protein 5; protein deglutamylase CCP5
AGER	AGER	advanced glycosylation end-product specific receptor	advanced glycosylation end product-specific receptor; receptor for advanced glycation end-products
AGFG1	AGFG1	ArfGAP with FG repeats 1	HIV-1 Rev-binding protein; Rab, Rev/Rex activation domain-binding protein; arf-GAP domain and FG repeat-containing protein 1; arf-GAP domain and FG repeats-containing protein 1; hRIP, Rev interacting protein; nucleoporin-like protein RIP; rev-interacting protein; rev/Rex activation domain-binding protein
AGFG2	AGFG2	ArfGAP with FG repeats 2	HIV-1 Rev-binding protein-like protein; Rev/Rex activation domain binding protein-related; arf-GAP domain and FG repeat-containing protein 2; arf-GAP domain and FG repeats-containing protein 2; nucleoporin; rev/Rex activation domain-binding protein related
AGGF1	AGGF1	angiogenic factor with G-patch and FHA domains 1	G patch domain-containing protein 7; angiogenic factor VG5Q; angiogenic factor with G patch and FHA domains 1; vasculogenesis gene on 5q protein
AGK	AGK	acylglycerol kinase	acylglycerol kinase, mitochondrial; hAGK; hsMuLK; multi-substrate lipid kinase; multiple substrate lipid kinase
AGL	AGL	amylo-alpha-1,6-glucosidase and 4-alpha-glucanotransferase	amylo-1, 6-glucosidase, 4-alpha-glucanotransferase; amylo-alpha-1, 6-glucosidase, 4-alpha-glucanotransferase; amylo-alpha-1, 6-glucosidase, 4-alpha-glucanotransferaseprovided; glycogen debrancher; glycogen debranching enzyme; glycogen debranching protein
AGMAT	AGMAT	agmatinase (putative)	AUH; agmatinase; agmatinase, mitochondrial; agmatine ureohydrolase (agmatinase); arginase, mitochondrial; guanidino acid hydrolase, mitochondrial; guanidinobutyrase, mitochondrial; guanidinopropionase, mitochondrial
AGMO	AGMO	alkylglycerol monooxygenase	alkylglycerol monooxygenase; glyceryl-ether monooxygenase; transmembrane protein 195
AGO1	AGO1	argonaute RISC component 1	Golgi Endoplasmic Reticulum protein 95 kDa; argonaute 1, RISC catalytic component; argonaute RISC catalytic component 1; argonaute1; eIF-2C 1; eIF2C 1; eukaryotic translation initiation factor 2C, 1; protein argonaute-1; putative RNA-binding protein Q99
AGO2	AGO2	argonaute RISC catalytic component 2	PAZ Piwi domain protein; argonaute 2, RISC catalytic component; cancer susceptibility candidate 7 (non-protein coding); eukaryotic translation initiation factor 2C, 2; long intergenic non-protein coding RNA 980; protein argonaute-2; protein slicer
AGO3	AGO3	argonaute RISC catalytic component 3	argonaute 3, RISC catalytic component; eukaryotic translation initiation factor 2C, 3; hAgo3; protein argonaute-3
AGO4	AGO4	argonaute RISC component 4	argonaute 4, RISC catalytic component; argonaute RISC catalytic component 4; eukaryotic translation initiation factor 2C, 4; protein argonaute-4
AGPAT1	AGPAT1	1-acylglycerol-3-phosphate O-acyltransferase 1	1-AGP acyltransferase 1; 1-AGPAT 1; 1-acyl-sn-glycerol-3-phosphate acyltransferase alpha; 1-acylglycerol-3-phosphate O-acyltransferase 1 (acetoacetly Coenzyme A thiolase); 1-acylglycerol-3-phosphate O-acyltransferase 1 (lysophosphatidic acid acyltransferase, alpha); epididymis secretory sperm binding protein; lysophosphatidic acid acyltransferase alpha; lysophospholipid acyltransferase; lysophosp…
AGPAT2	AGPAT2	1-acylglycerol-3-phosphate O-acyltransferase 2	1-AGP acyltransferase 2; 1-acyl-sn-glycerol-3-phosphate acyltransferase beta; 1-acylglycerol-3-phosphate O-acyltransferase 2 (lysophosphatidic acid acyltransferase, beta); lysophosphatidic acid acyltransferase-beta; lysophospholipid acyltransferase 2; testicular tissue protein Li 143
AGPAT3	AGPAT3	1-acylglycerol-3-phosphate O-acyltransferase 3	1-AGP acyltransferase 3; 1-acyl-sn-glycerol-3-phosphate acyltransferase gamma; lysophosphatidic acid acyltransferase gamma; lysophosphatidic acid acyltransferase-gamma1; lysophospholipid acyltransferase 3
AGPAT4	AGPAT4	1-acylglycerol-3-phosphate O-acyltransferase 4	1-AGP acyltransferase 4; 1-AGPAT 4; 1-acyl-sn-glycerol-3-phosphate acyltransferase delta; 1-acylglycerol-3-phosphate O-acyltransferase 4 (lysophosphatidic acid acyltransferase, delta); lysophosphatidic acid acyltransferase delta; lysophosphatidic acid acyltransferase-delta (LPAAT-delta); lysophospholipid acyltransferase 4
AGPAT5	AGPAT5	1-acylglycerol-3-phosphate O-acyltransferase 5	1-AGP acyltransferase 5; 1-AGPAT 5; 1-acyl-sn-glycerol-3-phosphate acyltransferase epsilon; 1-acylglycerol-3-phosphate O-acyltransferase 5 (lysophosphatidic acid acyltransferase, epsilon); lysophosphatidic acid acyltransferase epsilon; lysophospholipid acyltransferase 5; testicular tissue protein Li 144
AGPS	AGPS	alkylglycerone phosphate synthase	aging-associated gene 5 protein; aging-associated protein 5; alkyl-DHAP synthase; alkyldihydroxyacetonephosphate synthase, peroxisomal
AGR2	AGR2	anterior gradient 2, protein disulphide isomerase family member	anterior gradient homolog 2; anterior gradient protein 2 homolog; epididymis secretory protein Li 116; protein disulfide isomerase family A, member 17; secreted cement gland homolog; secreted cement gland protein XAG-2 homolog
AGR3	AGR3	anterior gradient 3, protein disulphide isomerase family member	anterior gradient homolog 3; anterior gradient protein 3; anterior gradient protein 3 homolog; breast cancer membrane protein 11; protein disulfide isomerase family A, member 18
AGRN	AGRN	agrin	agrin; agrin proteoglycan
AGRP	AGRP	agouti related neuropeptide	agouti related protein homolog; agouti-related protein
AGT	AGT	angiotensinogen	alpha-1 antiproteinase, antitrypsin; angiotensin I; angiotensin II; angiotensinogen; fetal-liver predominant transporter 1; pre-angiotensinogen; serine (or cysteine) proteinase inhibitor; serpin A8; serpin peptidase inhibitor, clade A, member 8
AGTPBP1	AGTPBP1	ATP/GTP binding carboxypeptidase 1	ATP/GTP binding protein 1; carboxypeptidase-tubulin; cytosolic carboxypeptidase 1; nervous system nuclear protein induced by axotomy protein 1 homolog; protein deglutamylase CCP1; soluble carboxypeptidase; tubulinyl-Tyr carboxypeptidase; tyrosine carboxypeptidase
AGTR1	AGTR1	angiotensin II receptor type 1	AT1 receptor; type-1 angiotensin II receptor; type-1B angiotensin II receptor
AGTR2	AGTR2	angiotensin II receptor type 2	AT2 receptor; angiotensin II type-2 receptor; type-2 angiotensin II receptor
AGTRAP	AGTRAP	angiotensin II receptor associated protein	AT1 receptor-associated protein; ATI receptor-associated protein; angiotensin II, type I receptor-associated protein; type-1 angiotensin II receptor-associated protein
AGXT	AGXT	alanine--glyoxylate aminotransferase	L-alanine: glyoxylate aminotransferase 1; alanine--glyoxylate aminotransferase; alanine--glyoxylate and serine--pyruvate aminotransferase; hepatic peroxisomal alanine:glyoxylate aminotransferase; serine--pyruvate aminotransferase
AGXT2	AGXT2	alanine--glyoxylate aminotransferase 2	(R)-3-amino-2-methylpropionate--pyruvate transaminase; D-3-aminoisobutyrate-pyruvate aminotransferase; D-beta-aminoisobutyrate-pyruvate aminotransferase; alanine--glyoxylate aminotransferase 2, mitochondrial; beta-ALAAT II; beta-alanine-pyruvate aminotransferase
AHCTF1	AHCTF1 | AHCTF1P1	AT-hook containing transcription factor 1 | AT-hook containing transcription factor 1 pseudogene 1	ELYS transcription factor-like protein TMBS62; embryonic large molecule derived from yolk sac; protein ELYS; putative AT-hook-containing transcription factor 1 | AT hook containing transcription factor 1 pseudogene,AT hook containing transcription factor 1 pseudogene 1; ELYS-like
AHCY	AHCY	adenosylhomocysteinase	S-adenosyl-L-homocysteine hydrolase; S-adenosylhomocysteine hydrolase; adenosylhomocysteinase; epididymis secretory sperm binding protein
AHCYL1	AHCYL1	adenosylhomocysteinase like 1	DC-expressed AHCY-like molecule; IP(3)Rs binding protein released with IP(3); S-adenosyl homocysteine hydrolase homolog; S-adenosyl-L-homocysteine hydrolase 2; S-adenosylhomocysteine hydrolase-like protein 1; adenosylhomocysteinase 2; adoHcyase 2; dendritic cell expressed AHCY-like protein; epididymis secretory sperm binding protein; inositol 1,4,5-trisphosphate receptor-binding protein; protein …
AHCYL2	AHCYL2	adenosylhomocysteinase like 2	IP(3)Rs binding protein released with IP(3) 2; S-adenosyl-L-homocysteine hydrolase 3; S-adenosylhomocysteine hydrolase-like 2; adenosylhomocysteinase 3; long-IRBIT; putative adenosylhomocysteinase 3
AHDC1	AHDC1	AT-hook DNA binding motif containing 1	AT-hook DNA-binding motif-containing protein 1; transcription factor Gibbin
AHI1	AHI1	Abelson helper integration site 1	abelson helper integration site 1 protein homolog; contatins SH3 and WD40 domains; jouberin
AHNAK	AHNAK	AHNAK nucleoprotein	AHNAK-related; desmoyokin; neuroblast differentiation-associated protein AHNAK
AHNAK2	AHNAK2	AHNAK nucleoprotein 2	protein AHNAK2
AHR	AHR	aryl hydrocarbon receptor	AH-receptor; ah receptor; aromatic hydrocarbon receptor; aryl hydrocarbon receptor; class E basic helix-loop-helix protein 76
AHRR	AHRR | PDCD6-AHRR	aryl hydrocarbon receptor repressor | PDCD6-AHRR readthrough (NMD candidate)	ahR repressor; aryl hydrocarbon hydroxylase regulator; aryl hydrocarbon receptor repressor; class E basic helix-loop-helix protein 77; dioxin receptor repressor |
AHSA1	AHSA1	activator of HSP90 ATPase activity 1	AHA1, activator of heat shock 90kDa protein ATPase homolog 1; activator of 90 kDa heat shock protein ATPase homolog 1
AHSG	AHSG	alpha 2-HS glycoprotein	alpha-2-HS-glycoprotein; alpha-2-Z-globulin; ba-alpha-2-glycoprotein; fetuin-A
AHSP	AHSP	alpha hemoglobin stabilizing protein	alpha hemoglobin stabilising protein; alpha-hemoglobin-stabilizing protein; erythroid differentiation associated factor; erythroid differentiation-related factor
AICDA	AICDA	activation induced cytidine deaminase	cytidine aminohydrolase; epididymis secretory protein Li 284; integrated into Burkitt's lymphoma cell line Ramos; single-stranded DNA cytosine deaminase
AIDA	AIDA	axin interactor, dorsalization associated	axin interaction partner and dorsalization antagonist; axin interactor, dorsalization-associated protein
AIF1	AIF1	allograft inflammatory factor 1	allograft inflammatory factor 1; interferon gamma responsive transcript; ionized calcium-binding adapter molecule 1; protein G1
AIF1L	AIF1L	allograft inflammatory factor 1 like	allograft inflammatory factor 1-like; ionized calcium binding adapter molecule 2
AIFM1	AIFM1	apoptosis inducing factor mitochondria associated 1	apoptosis-inducing factor 1, mitochondrial; apoptosis-inducing factor, mitochondrion-associated, 1; auditory neuropathy, X-linked recessive 1; programmed cell death 8 (apoptosis-inducing factor); striatal apoptosis-inducing factor; testicular secretory protein Li 4
AIFM2	AIFM2	AIF family member 2	apoptosis inducing factor mitochondria associated 2; apoptosis-inducing factor (AIF)-like mitochondrion-associated inducer of death; apoptosis-inducing factor 2; apoptosis-inducing factor, mitochondrion-associated, 2; ferroptosis suppressor 1; ferroptosis suppressor protein 1; p53-responsive gene 3 protein
AIFM3	AIFM3	AIF family member 3	apoptosis inducing factor mitochondria associated 3; apoptosis-inducing factor 3; apoptosis-inducing factor like; apoptosis-inducing factor, mitochondrion-associated, 3
AIG1	AIG1	androgen induced 1	FAHFA hydrolase AIG1; androgen-induced gene 1 protein; fatty acid esters of hydroxy fatty acids hydrolase AIG1
AIM2	AIM2	absent in melanoma 2	interferon-inducible protein AIM2
AIMP1	AIMP1	aminoacyl tRNA synthetase complex interacting multifunctional protein 1	ARS-interacting multifunctional protein 1; aminoacyl tRNA synthase complex-interacting multifunctional protein 1; endothelial monocyte-activating polypeptide 2; endothelial-monocyte activating polypeptide II; multisynthase complex auxiliary component p43; multisynthetase complex auxiliary component p43; small inducible cytokine subfamily E, member 1 (endothelial monocyte-activating)
AIMP2	AIMP2	aminoacyl tRNA synthetase complex interacting multifunctional protein 2	ARS-interacting multi-functional protein 2; aminoacyl tRNA synthase complex-interacting multifunctional protein 2; multisynthase complex auxiliary component p38; multisynthetase complex auxiliary component p38; protein JTV-1
AIP	AIP	AHR interacting HSP90 co-chaperone	AH receptor-interacting protein; Ah receptor activated 9; FK506-binding protein 37; FKBP prolyl isomerase 16; HBV X-associated protein 2; X-associated protein-2; aryl hydrocarbon receptor interacting protein; aryl hydrocarbon receptor-associated protein 9; hepatitis B virus X-associated cellular protein 2; immunophilin homolog ARA9
AIPL1	AIPL1	AIP like 1 HSP90 co-chaperone	aryl hydrocarbon receptor interacting protein like 1; aryl-hydrocarbon-interacting protein-like 1
AIRE	AIRE	autoimmune regulator	autoimmune polyendocrinopathy candidiasis ectodermal dystrophy protein; autoimmune regulator
AIRIM	AIRIM	AFG2 interacting ribosome maturation factor	AFG2-interacting ribosome maturation factor; ribosome biogenesis protein C1orf109; uncharacterized protein C1orf109
AJAP1	AJAP1	adherens junctions associated protein 1	adherens junction-associated protein 1; membrane protein shrew-1; transmembrane protein SHREW1
AJM1	AJM1	apical junction component 1 homolog	apical junction component 1 homolog; uncharacterized protein C9orf172
AJUBA	AJUBA	ajuba LIM protein	LIM domain-containing protein ajuba; jub, ajuba homolog
AK1	AK1 | ST6GALNAC4-ST6GALNAC6-AK1	adenylate kinase 1 | ST6GALNAC4-ST6GALNAC6-AK1 readthrough	ATP-AMP transphosphorylase 1; ATP:AMP phosphotransferase; adenylate kinase isoenzyme 1; adenylate monophosphate kinase; epididymis secretory sperm binding protein; myokinase; testis secretory sperm binding protein Li 58j |
AK2	AK2	adenylate kinase 2	ATP-AMP transphosphorylase 2; ATP:AMP phosphotransferase; adenylate kinase 2, mitochondrial; adenylate kinase isoenzyme 2, mitochondrial; adenylate monophosphate kinase; testis secretory sperm-binding protein Li 220n
AK3	AK3	adenylate kinase 3	GTP:AMP phosphotransferase AK3, mitochondrial; GTP:AMP phosphotransferase, mitochondrial; adenylate kinase 3 alpha-like 1; adenylate kinase 6, adenylate kinase 3 like 1; adenylate kinase isozyme 3
AK4	AK4	adenylate kinase 4	ATP-AMP transphosphorylase; GTP:AMP phosphotransferase AK4, mitochondrial; adenylate kinase 3-like 1; adenylate kinase 4, mitochondrial; adenylate kinase isoenzyme 4, mitochondrial; epididymis secretory sperm binding protein; mitochondrial adenylate kinase-3; nucleoside-triphosphate-adenylate kinase
AK5	AK5	adenylate kinase 5	AK 5; ATP-AMP transphosphorylase 5; adenylate kinase 6; adenylate kinase isoenzyme 5
AK6	AK6	adenylate kinase 6	ATP-AMP transphosphorylase 6; adenylate kinase isoenzyme 6; adrenal gland protein AD-004; coilin interacting nuclear ATPase protein; coilin interacting protein; sperm protein HTL-T-97p
AK7	AK7	adenylate kinase 7	ATP-AMP transphosphorylase 7; adenylate kinase 7; putative adenylate kinase 7
AK8	AK8	adenylate kinase 8	ATP-AMP transphosphorylase 8; adenylate kinase 8; putative adenylate kinase-like protein C9orf98
AK9	AK9	adenylate kinase 9	adenylate kinase 9; adenylate kinase domain containing 1; adenylate kinase domain containing 2
AKAIN1	AKAIN1	A-kinase anchor inhibitor 1	A kinase (PRKA) anchor inhibitor 1; A-kinase anchor protein C18orf42; A-kinase anchor protein inhibitor 1
AKAP1	AKAP1	A-kinase anchoring protein 1	A kinase (PRKA) anchor protein 1; A-kinase anchor protein 1, mitochondrial; A-kinase anchor protein 149 kDa; AKAP 149; D-AKAP-1; dual-specificity A-kinase anchoring protein 1; protein kinase A anchoring protein 1; protein kinase A1; protein phosphatase 1, regulatory subunit 43; spermatid A-kinase anchor protein 84; testicular secretory protein Li 5; tudor domain containing 17
AKAP10	AKAP10	A-kinase anchoring protein 10	A kinase (PRKA) anchor protein 10; A-kinase anchor protein 10, mitochondrial; dual specificity A kinase-anchoring protein 2; mitochondrial A kinase PPKA anchor protein 10; protein kinase A anchoring protein 10
AKAP11	AKAP11	A-kinase anchoring protein 11	A kinase (PRKA) anchor protein 11; A-kinase anchor protein 11; A-kinase anchor protein 220 kDa; A-kinase anchoring protein, 220kDa; a kinase anchor protein 220 kDa; protein kinase A anchoring protein 11; protein phosphatase 1, regulatory subunit 44
AKAP12	AKAP12	A-kinase anchoring protein 12	A kinase (PRKA) anchor protein 12; A-kinase anchor protein 12; A-kinase anchor protein, 250kDa; AKAP 250; Src-Suppressed C Kinase Substrate; kinase scaffold protein gravin; myasthenia gravis autoantigen gravin
AKAP13	AKAP13	A-kinase anchoring protein 13	A kinase (PRKA) anchor protein 13; A-kinase anchor protein 13; LBC oncogene; breast cancer nuclear receptor-binding auxiliary protein; guanine nucleotide exchange factor Lbc; human thyroid-anchoring protein 31; lymphoid blast crisis oncogene; non-oncogenic Rho GTPase-specific GTP exchange factor; protein kinase A-anchoring protein 13
AKAP14	AKAP14	A-kinase anchoring protein 14	A kinase (PRKA) anchor protein 14; A-kinase anchor protein 14; A-kinase anchor protein 28 kDa; A-kinase anchoring protein 28; AKAP 28; AKAP-14; protein kinase A-anchoring protein 14
AKAP17A	AKAP17A	A-kinase anchoring protein 17A	A kinase (PRKA) anchor protein 17A; A-kinase anchor protein 17A; B-lymphocyte surface antigen; protein kinase A-anchoring protein 17A; pseudoautosomal gene XE7; splicing factor, arginine/serine-rich 17A
AKAP3	AKAP3	A-kinase anchoring protein 3	A kinase (PRKA) anchor protein 3; A-kinase anchor protein 3; A-kinase anchor protein, 110kDa; Fibrous Sheath Protein of 95 kDa; cancer/testis antigen 82; epididymis luminal protein 159; epididymis secretory sperm binding protein; fibrousheathin I; fibrousheathin-1; protein kinase A binding protein AKAP 110; protein kinase A-anchoring protein 3; sperm oocyte-binding protein 1
AKAP4	AKAP4	A-kinase anchoring protein 4	A kinase (PRKA) anchor protein 4; A-kinase anchor protein 4; A-kinase anchor protein 82 kDa; cancer/testis antigen 99; epididymis secretory sperm binding protein; major sperm fibrous sheath protein; protein kinase A anchoring protein 4; testis-specific gene HI
AKAP5	AKAP5	A-kinase anchoring protein 5	A kinase (PRKA) anchor protein 5; A-kinase anchor protein 5; A-kinase anchor protein 79 kDa; A-kinase anchoring protein 75/79; AKAP 79; cAMP-dependent protein kinase regulatory subunit II high affinity-binding protein
AKAP6	AKAP6	A-kinase anchoring protein 6	A kinase (PRKA) anchor protein 6; A-kinase anchor protein 100 kDa; A-kinase anchor protein 6; AKAP 100; AKAP-6; protein kinase A anchoring protein 6
AKAP7	AKAP7	A-kinase anchoring protein 7	A kinase (PRKA) anchor protein 7; A-kinase anchor protein 18 kDa; A-kinase anchor protein 9 kDa; A-kinase anchoring protein 7; AKAP 18
AKAP8	AKAP8	A-kinase anchoring protein 8	A kinase (PRKA) anchor protein 8; A-kinase anchor protein 8; A-kinase anchor protein, 95kDa
AKAP8L	AKAP8L	A-kinase anchoring protein 8 like	A kinase (PRKA) anchor protein 8-like; A-kinase anchor protein 8-like; AKAP8-like protein; helicase A-binding protein 95 kDa; homologous to AKAP95 protein; neighbor of A-kinase anchoring protein 95; neighbor of AKAP95; testis tissue sperm-binding protein Li 90mP
AKAP9	AKAP9	A-kinase anchoring protein 9	A kinase (PRKA) anchor protein (yotiao) 9; A kinase (PRKA) anchor protein 9; A-kinase anchor protein 350 kDa; A-kinase anchor protein 450 kDa; A-kinase anchor protein 9; AKAP 120-like protein; AKAP9-BRAF fusion protein; centrosome- and Golgi-localized PKN-associated protein; centrosome- and golgi-localized protein kinase N-associated protein; kinase N-associated protein; protein hyperion; protein…
AKIP1	AKIP1	A-kinase interacting protein 1	A kinase (PRKA) interacting protein 1; A-kinase-interacting protein 1; breast cancer associated gene 3; koyt binding protein 1; koyt binding protein 2; koyt binding protein 3; proline-rich protein BCA3
AKIRIN1	AKIRIN1	akirin 1	akirin-1
AKIRIN2	AKIRIN2	akirin 2	akirin-2; fourteen-three-three beta interactant 1
AKNA	AKNA	AT-hook transcription factor	AKNA transcript F2; AT-hook transcription factor AKNA; AT-hook-containing transcription factor; microtubule organization protein AKNA
AKNAD1	AKNAD1	AKNA domain containing 1	protein AKNAD1
AKR1A1	AKR1A1	aldo-keto reductase family 1 member A1	HEL-S-165mP; S-nitroso-CoA reductase; alcohol dehydrogenase; aldehyde reductase; aldo-keto reductase family 1 member A1; dihydrodiol dehydrogenase 3; epididymis secretory protein Li 6; epididymis secretory sperm binding protein Li 165mP; glucuronate reductase; glucuronolactone reductase; scorR
AKR1B1	AKR1B1	aldo-keto reductase family 1 member B	Lii5-2 CTCL tumor antigen; aldehyde reductase 1; aldo-keto reductase family 1 member B1; aldose reductase; low Km aldose reductase
AKR1B10	AKR1B10 | AKR1B15	aldo-keto reductase family 1 member B10 | aldo-keto reductase family 1 member B15	ARP; SI reductase; aldo-keto reductase family 1 member B10; aldo-keto reductase family 1, member B10 (aldose reductase); aldo-keto reductase family 1, member B11 (aldose reductase-like); aldose reductase-like 1; aldose reductase-like peptide; aldose reductase-related protein; hARP; small intestine reductase | aldo-keto reductase family 1 member B15; estradiol 17-beta-dehydrogenase AKR1B15; farnes…
AKR1B15	AKR1B15	aldo-keto reductase family 1 member B15	aldo-keto reductase family 1 member B15; estradiol 17-beta-dehydrogenase AKR1B15; farnesol dehydrogenase; putative aldo-keto reductase family 1 member B15; testosterone 17beta-dehydrogenase
AKR1C1	AKR1C1	aldo-keto reductase family 1 member C1	20 alpha-hydroxysteroid dehydrogenase; aldo-keto reductase C; aldo-keto reductase family 1 member C1; chlordecone reductase homolog HAKRC; dihydrodiol dehydrogenase 1; dihydrodiol dehydrogenase 1/2; dihydrodiol dehydrogenase 1; 20-alpha (3-alpha)-hydroxysteroid dehydrogenase; hepatic dihydrodiol dehydrogenase; high-affinity hepatic bile acid-binding protein; indanol dehydrogenase; trans-1,2-dihyd…
AKR1C2	AKR1C1 | AKR1C2	aldo-keto reductase family 1 member C1 | aldo-keto reductase family 1 member C2	20 alpha-hydroxysteroid dehydrogenase; aldo-keto reductase C; aldo-keto reductase family 1 member C1; chlordecone reductase homolog HAKRC; dihydrodiol dehydrogenase 1; dihydrodiol dehydrogenase 1/2; dihydrodiol dehydrogenase 1; 20-alpha (3-alpha)-hydroxysteroid dehydrogenase; hepatic dihydrodiol dehydrogenase; high-affinity hepatic bile acid-binding protein; indanol dehydrogenase; trans-1,2-dihyd…
AKR1C3	AKR1C3	aldo-keto reductase family 1 member C3	3-alpha hydroxysteroid dehydrogenase, type II; 3-alpha-HSD type II, brain; aldo-keto reductase family 1 member C3; chlordecone reductase homolog HAKRb; dihydrodiol dehydrogenase 3; dihydrodiol dehydrogenase X; indanol dehydrogenase; prostaglandin F synthase; testosterone 17-beta-dehydrogenase 5; trans-1,2-dihydrobenzene-1,2-diol dehydrogenase; type IIb 3-alpha hydroxysteroid dehydrogenase
AKR1C4	AKR1C4	aldo-keto reductase family 1 member C4	3-alpha-HSD1; 3alpha-hydroxysteroid 3-dehydrogenase; aldo-keto reductase family 1 member C4; chlordecone reductase; 3-alpha hydroxysteroid dehydrogenase, type I; dihydrodiol dehydrogenase 4; dihydrodiol dehydrogenase isozyme DD4; type I 3-alpha-hydroxysteroid dehydrogenase
AKR1C8	AKR1C8	aldo-keto reductase family 1 member C8	aldo-keto reductase family 1 member C-like protein 1; aldo-keto reductase family 1 member C8, pseudogene; aldo-keto reductase family 1, member C-like 1; protein RAKc; putative aldo-keto reductase family 1 member C8
AKR1D1	AKR1D1	aldo-keto reductase family 1 member D1	aldo-keto reductase family 1 member D1; delta(4)-3-ketosteroid 5-beta-reductase; delta(4)-3-oxosteroid 5-beta-reductase; steroid-5-beta-reductase, beta polypeptide 1 (3-oxo-5 beta-steroid delta 4-dehydrogenase beta 1)
AKR1E2	AKR1E2	aldo-keto reductase family 1 member E2	1,5-anhydro-D-fructose reductase; AF reductase; aldo-keto reductase family 1 member C-like protein 2; aldo-keto reductase family 1, member C-like 2; aldo-keto reductase loopADR; human testis aldo-keto reductase; human testis specific protein; testis aldo-keto reductase; testis-specific protein
AKR7A2	AKR7A2	aldo-keto reductase family 7 member A2	AFB1 aldehyde reductase 1; AFB1-AR 1; HEL-S-166mP; SSA reductase; aflatoxin B1 aldehyde reductase member 2; aflatoxin aldehyde reductase; aflatoxin beta1 aldehyde reductase; aldoketoreductase 7; epididymis secretory sperm binding protein Li 166mP; succinic semialdehyde reductase
AKR7A3	AKR7A3	aldo-keto reductase family 7 member A3	AFB1 aldehyde reductase 2; AFB1-AR 2; aflatoxin B1 aldehyde reductase 2; aflatoxin B1 aldehyde reductase member 3; aflatoxin aldehyde reductase; epididymis secretory sperm binding protein
AKR7L	AKR7L	aldo-keto reductase family 7 like (gene/pseudogene)	AFB1 aldehyde reductase 3; aflatoxin B1 aldehyde reductase member 4; aldo-keto reductase family 7 pseudogene; aldo-keto reductase family 7-like; aldoketoreductase 7-like
AKT1	AKT1	AKT serine/threonine kinase 1	AKT1m; PKB alpha; RAC-PK-alpha; RAC-alpha serine/threonine-protein kinase; protein kinase B alpha; proto-oncogene c-Akt; rac protein kinase alpha; serine-threonine protein kinase; v-akt murine thymoma viral oncogene homolog 1; v-akt murine thymoma viral oncogene-like protein 1
AKT1S1	AKT1S1	AKT1 substrate 1	40 kDa proline-rich AKT substrate; AKT1 substrate 1 (proline rich); proline-rich AKT1 substrate 1
AKT2	AKT2	AKT serine/threonine kinase 2	PKB beta; RAC-PK-beta; RAC-beta serine/threonine-protein kinase; murine thymoma viral (v-akt) homolog-2; protein kinase Akt-2; protein kinase B beta; putative v-akt murine thymoma viral oncoprotein 2; rac protein kinase beta; v-akt murine thymoma viral oncogene homolog 2
AKT3	AKT3	AKT serine/threonine kinase 3	PKB gamma; RAC-gamma serine/threonine protein kinase; RAC-gamma serine/threonine-protein kinase; v-akt murine thymoma viral oncogene homolog 3 (protein kinase B, gamma)
AKTIP	AKTIP	AKT interacting protein	AKT-interacting protein; fused toes homolog
ALAD	ALAD	aminolevulinate dehydratase	aminolevulinate, delta-, dehydratase; delta-aminolevulinic acid dehydratase; porphobilinogen synthase; testicular tissue protein Li 95
ALAS1	ALAS1	5'-aminolevulinate synthase 1	5-aminolevulinate synthase, non-specific, mitochondrial; 5-aminolevulinate synthase, nonspecific, mitochondrial; 5-aminolevulinic acid synthase 1; aminolevulinate, delta-, synthase 1; delta-ALA synthase 1; delta-aminolevulinate synthase 1; migration-inducing protein 4
ALAS2	ALAS2	5'-aminolevulinate synthase 2	5-aminolevulinate synthase, erythroid-specific, mitochondrial; 5-aminolevulinic acid synthase 2; aminolevulinate, delta-, synthase 2; delta-ALA synthase 2; delta-ALA synthetase; delta-aminolevulinate synthase 2; erythroid-specific delta-aminolevulinate synthase
ALB	ALB	albumin	albumin; serum albumin
ALCAM	ALCAM	activated leukocyte cell adhesion molecule	CD166 antigen
ALDH16A1	ALDH16A1	aldehyde dehydrogenase 16 family member A1	aldehyde dehydrogenase family 16 member A1
ALDH18A1	ALDH18A1	aldehyde dehydrogenase 18 family member A1	Spastic paraplegia-9 (spastic paraparesis with amyotrophy, cataracts and gastroesophageal reflux); aldehyde dehydrogenase family 18 member A1; delta-1-pyrroline-5-carboxylate synthase; delta-1-pyrroline-5-carboxylate synthetase; delta1-pyrroline-5-carboxlate synthetase; pyrroline-5-carboxylate synthetase (glutamate gamma-semialdehyde synthetase); spastic paraplegia 9 (autosomal dominant)
ALDH1A1	ALDH1A1	aldehyde dehydrogenase 1 family member A1	3-deoxyglucosone dehydrogenase; ALDH class 1; ALHDII; RALDH 1; acetaldehyde dehydrogenase 1; aldehyde dehydrogenase 1, soluble; aldehyde dehydrogenase 1A1; aldehyde dehydrogenase, liver cytosolic; epididymis luminal protein 12; epididymis luminal protein 9; epididymis secretory sperm binding protein Li 53e; retinal dehydrogenase 1; retinaldehyde dehydrogenase 1
ALDH1A2	ALDH1A2	aldehyde dehydrogenase 1 family member A2	RALDH 2; retinal dehydrogenase 2; retinaldehyde-specific dehydrogenase type 2
ALDH1A3	ALDH1A3	aldehyde dehydrogenase 1 family member A3	acetaldehyde dehydrogenase 6; aldehyde dehydrogenase 6; retinaldehyde dehydrogenase 3
ALDH1B1	ALDH1B1	aldehyde dehydrogenase 1 family member B1	ALDH class 2; acetaldehyde dehydrogenase 5; aldehyde dehydrogenase 5; aldehyde dehydrogenase X, mitochondrial; epididymis secretory sperm binding protein
ALDH1L1	ALDH1L1	aldehyde dehydrogenase 1 family member L1	10-formyltetrahydrofolate dehydrogenase; MER57B-ALDH1L1; cytosolic 10-formyltetrahydrofolate dehydrogenase
ALDH1L2	ALDH1L2	aldehyde dehydrogenase 1 family member L2	10-formyltetrahydrofolate dehydrogenase ALDH1L2; aldehyde dehydrogenase family 1 member L2, mitochondrial; mitochondrial 10-FTHFDH; mitochondrial 10-formyltetrahydrofolate dehydrogenase; probable 10-formyltetrahydrofolate dehydrogenase ALDH1L2
ALDH2	ALDH2	aldehyde dehydrogenase 2 family member	ALDH class 2; acetaldehyde dehydrogenase 2; aldehyde dehydrogenase 2 family (mitochondrial); aldehyde dehydrogenase, mitochondrial; epididymis secretory sperm binding protein; liver mitochondrial ALDH; nucleus-encoded mitochondrial aldehyde dehydrogenase 2
ALDH3A1	ALDH3A1	aldehyde dehydrogenase 3 family member A1	aldehyde dehydrogenase isozyme 3; aldehyde dehydrogenase type III; aldehyde dehydrogenase, dimeric NADP-preferring; stomach aldehyde dehydrogenase
ALDH3A2	ALDH3A2	aldehyde dehydrogenase 3 family member A2	aldehyde dehydrogenase 10; aldehyde dehydrogenase family 3 member A2; fatty aldehyde dehydrogenase; microsomal aldehyde dehydrogenase
ALDH3B1	ALDH3B1	aldehyde dehydrogenase 3 family member B1	aldehyde dehydrogenase 3B1; aldehyde dehydrogenase 7; aldehyde dehydrogenase family 3 member B1; long-chain fatty aldehyde dehydrogenase; medium-chain fatty aldehyde dehydrogenase
ALDH3B2	ALDH3B2	aldehyde dehydrogenase 3 family member B2	acetaldehyde dehydrogenase 8; aldehyde dehydrogenase 8; aldehyde dehydrogenase family 3 member B2; long-chain fatty aldehyde dehydrogenase
ALDH4A1	ALDH4A1	aldehyde dehydrogenase 4 family member A1	L-glutamate gamma-semialdehyde dehydrogenase; P5C dehydrogenase; aldehyde dehydrogenase family 4 member A1; delta-1-pyrroline-5-carboxylate dehydrogenase, mitochondrial; epididymis secretory sperm binding protein; mitochondrial delta-1-pyrroline 5-carboxylate dehydrogenase
ALDH5A1	ALDH5A1	aldehyde dehydrogenase 5 family member A1	NAD(+)-dependent succinic semialdehyde dehydrogenase; mitochondrial succinate semialdehyde dehydrogenase; succinate-semialdehyde dehydrogenase, mitochondrial
ALDH6A1	ALDH6A1	aldehyde dehydrogenase 6 family member A1	malonate-semialdehyde dehydrogenase (acetylating); methylmalonate-semialdehyde dehydrogenase [acylating], mitochondrial; methylmalonate-semialdehyde/malonate-semialdehyde dehydrogenase [acylating], mitochondrial; mitochondrial acylating methylmalonate-semialdehyde dehydrogenase; testicular tissue protein Li 122
ALDH7A1	ALDH7A1	aldehyde dehydrogenase 7 family member A1	26g turgor protein homolog; P6c dehydrogenase; alpha-AASA dehydrogenase; alpha-aminoadipic semialdehyde dehydrogenase; antiquitin-1; betaine aldehyde dehydrogenase; delta1-piperideine-6-carboxylate dehydrogenase; epididymis secretory sperm binding protein
ALDH8A1	ALDH8A1	aldehyde dehydrogenase 8 family member A1	2-aminomuconic semialdehyde dehydrogenase; aldehyde dehydrogenase 12; aldehyde dehydrogenase family protein
ALDH9A1	ALDH9A1	aldehyde dehydrogenase 9 family member A1	4-trimethylaminobutyraldehyde dehydrogenase; R-aminobutyraldehyde dehydrogenase; aldehyde dehydrogenase (NAD+); aldehyde dehydrogenase E3 isozyme; aldehyde dehydrogenase family 9 member A1; formaldehyde dehydrogenase; gamma-aminobutyraldehyde dehydrogenase
ALDOA	ALDOA | LOC112694756	aldolase, fructose-bisphosphate A | uncharaterized LOC112694756	aldolase A, fructose-bisphosphate; epididymis secretory sperm binding protein Li 87p; fructose-1,6-bisphosphate triosephosphate-lyase; fructose-bisphosphate aldolase A; lung cancer antigen NY-LU-1; muscle-type aldolase | Fructose-bisphosphate aldolase A; Lung cancer antigen NY-LU-1; Muscle-type aldolase; uncharacterized protein LOC112694756
ALDOB	ALDOB	aldolase, fructose-bisphosphate B	aldolase 2; aldolase B, fructose-bisphosphatase; aldolase B, fructose-bisphosphate; fructose-bisphosphate aldolase B; liver-type aldolase
ALDOC	ALDOC	aldolase, fructose-bisphosphate C	aldolase 3; aldolase C, fructose-bisphosphate; brain-type aldolase; epididymis secretory sperm binding protein; fructoaldolase C; fructose-1,6-biphosphate triosephosphate lyase; fructose-bisphosphate aldolase C
ALG1	ALG1	ALG1 chitobiosyldiphosphodolichol beta-mannosyltransferase	GDP-Man:GlcNAc2-PP-dolichol mannosyltransferase; GDP-mannose-dolichol diphosphochitobiose mannosyltransferase; asparagine-linked glycosylation 1 homolog (yeast, beta-1,4-mannosyltransferase); asparagine-linked glycosylation 1, beta-1,4-mannosyltransferase homolog; asparagine-linked glycosylation protein 1 homolog; beta-1,4-mannosyltransferase; chitobiosyldiphosphodolichol beta-mannosyltransferase…
ALG10	ALG10	ALG10 alpha-1,2-glucosyltransferase	alpha-1,2-glucosyltransferase ALG10-A; alpha-2-glucosyltransferase ALG10-A; alpha2-glucosyltransferase; asparagine-linked glycosylation 10 homolog (yeast, alpha-1,2-glucosyltransferase); asparagine-linked glycosylation 10, alpha-1,2-glucosyltransferase homolog; asparagine-linked glycosylation protein 10 homolog A; derepression of ITR1 expression 2 homolog; dol-P-Glc:Glc(2)Man(9)GlcNAc(2)-PP-Dol a…
ALG10B	ALG10B	ALG10 alpha-1,2-glucosyltransferase B	ALG10B, alpha-1,2-glucosyltransferase; alpha-1,2-glucosyltransferase ALG10-A; alpha-2-glucosyltransferase ALG10-B; asparagine-linked glycosylation 10 homolog B (yeast, alpha-1,2-glucosyltransferase); asparagine-linked glycosylation 10, alpha-1,2-glucosyltransferase homolog B; asparagine-linked glycosylation protein 10 homolog B; dol-P-Glc:Glc(2)Man(9)GlcNAc(2)-PP-Dol alpha-1,2-glucosyltransferase…
ALG12	ALG12	ALG12 alpha-1,6-mannosyltransferase	asparagine-linked glycosylation 12 homolog (S. cerevisiae, alpha-1,6-mannosyltransferase); asparagine-linked glycosylation 12 homolog (yeast, alpha-1,6-mannosyltransferase); asparagine-linked glycosylation 12, alpha-1,6-mannosyltransferase homolog; asparagine-linked glycosylation protein 12 homolog; dol-P-Man dependent alpha-1,6-mannosyltransferase; dol-P-Man:Man(7)GlcNAc(2)-PP-Dol alpha-1,6-mann…
ALG13	ALG13	ALG13 UDP-N-acetylglucosaminyltransferase subunit	N-acetylglucosaminyldiphosphodolichol N-acetylglucosaminyltransferase; UDP-N-acetylglucosamine transferase subunit ALG13; UDP-N-acetylglucosamine transferase subunit ALG13 homolog; asparagine-linked glycosylation 13 homolog; glycosyltransferase 28 domain-containing protein 1; hematopoietic stem/progenitor cells protein MDS031; putative bifunctional UDP-N-acetylglucosamine transferase and deubiqui…
ALG14	ALG14	ALG14 UDP-N-acetylglucosaminyltransferase subunit	UDP-N-acetylglucosamine transferase subunit ALG14; UDP-N-acetylglucosamine transferase subunit ALG14 homolog
ALG1L2	ALG1L2	ALG1 chitobiosyldiphosphodolichol beta-mannosyltransferase like 2	asparagine-linked glycosylation 1-like 2; putative glycosyltransferase ALG1L2
ALG2	ALG2	ALG2 alpha-1,3/1,6-mannosyltransferase	GDP-Man:Man(1)GlcNAc(2)-PP-Dol alpha-1,3-mannosyltransferase; GDP-Man:Man(1)GlcNAc(2)-PP-dolichol mannosyltransferase; GDP-Man:Man(2)GlcNAc(2)-PP-Dol alpha-1,6-mannosyltransferase; alpha-1,3-mannosyltransferase ALG2; alpha-1,3/1,6-mannosyltransferase ALG2; asparagine-linked glycosylation 2 homolog (S. cerevisiae, alpha-1,3-mannosyltransferase); asparagine-linked glycosylation 2 homolog (yeast, al…
ALG3	ALG3	ALG3 alpha-1,3- mannosyltransferase	Not56-like protein; asparagine-linked glycosylation 3 homolog (S. cerevisiae, alpha-1,3-mannosyltransferase); asparagine-linked glycosylation 3 homolog (yeast, alpha-1,3-mannosyltransferase); asparagine-linked glycosylation 3, alpha-1,3- mannosyltransferase homolog; asparagine-linked glycosylation protein 3 homolog; carbohydrate deficient glycoprotein syndrome type IV; dol-P-Man-dependent alpha(1…
ALG5	ALG5	ALG5 dolichyl-phosphate beta-glucosyltransferase	Alg5, S. cerevisiae, homolog of; asparagine-linked glycosylation 5 homolog (S. cerevisiae, dolichyl-phosphate beta-glucosyltransferase); asparagine-linked glycosylation 5 homolog (yeast, dolichyl-phosphate beta-glucosyltransferase); asparagine-linked glycosylation 5, dolichyl-phosphate beta-glucosyltransferase homolog; asparagine-linked glycosylation protein 5 homolog; dolP-glucosyltransferase; d…
ALG6	ALG6	ALG6 alpha-1,3-glucosyltransferase	Man(9)GlcNAc(2)-PP-Dol alpha-1,3-glucosyltransferase; asparagine-linked glycosylation 6 homolog (S. cerevisiae, alpha-1,3-glucosyltransferase); asparagine-linked glycosylation 6 homolog (yeast, alpha-1,3-glucosyltransferase); asparagine-linked glycosylation 6, alpha-1,3-glucosyltransferase homolog; asparagine-linked glycosylation protein 6 homolog; dol-P-Glc:Man(9)GlcNAc(2)-PP-Dol alpha-1,3-gluco…
ALG8	ALG8	ALG8 alpha-1,3-glucosyltransferase	HUSSY-02; asparagine-linked glycosylation 8 alpha-13-glucosyltransferase-like protein; asparagine-linked glycosylation 8 homolog (S. cerevisiae, alpha-1,3-glucosyltransferase); asparagine-linked glycosylation 8 homolog (yeast, alpha-1,3-glucosyltransferase); asparagine-linked glycosylation 8, alpha-1,3-glucosyltransferase homolog; asparagine-linked glycosylation protein 8 homolog; dol-P-Glc:Glc(1…
ALG9	ALG9	ALG9 alpha-1,2-mannosyltransferase	alpha-1,2-mannosyltransferase ALG9; asparagine-linked glycosylation 9 alpha-12-mannosyltransferase-like protein; asparagine-linked glycosylation 9 homolog (S. cerevisiae, alpha- 1,2-mannosyltransferase); asparagine-linked glycosylation 9 homolog (yeast, alpha- 1,2-mannosyltransferase); asparagine-linked glycosylation 9, alpha-1,2-mannosyltransferase homolog; asparagine-linked glycosylation protei…
ALK	ALK	ALK receptor tyrosine kinase	ALK tyrosine kinase receptor; CD246 antigen; anaplastic lymphoma receptor tyrosine kinase; mutant anaplastic lymphoma kinase
ALKAL1	ALKAL1	ALK and LTK ligand 1	ALK and LTK ligand 1; AUG-beta; RPLK9433; augmentor beta; augmentor-alpha; family with sequence similarity 150 member A; protein FAM150A
ALKAL2	ALKAL2	ALK and LTK ligand 2	ALK and LTK ligand 2; AUG-alpha; augmentor alpha; augmentor-beta; family with sequence similarity 150 member B; protein FAM150B
ALKBH1	ALKBH1	alkB homolog 1, histone H2A dioxygenase	DNA 6mA demethylase; DNA N6-methyl adenine demethylase ALKBH1; DNA demethylase ALKBH1; DNA lyase ABH1; DNA oxidative demethylase ALKBH1; alkB, alkylation repair homolog 1; alkylated DNA repair protein alkB homolog 1; alkylation repair, alkB homolog; alpha-ketoglutarate-dependent dioxygenase ABH1; mRNA N(3)-methylcytidine demethylase; nucleic acid dioxygenase ALKBH1; tRNA N1-methyl adenine demethy…
ALKBH2	ALKBH2	alkB homolog 2, alpha-ketoglutarate dependent dioxygenase	2OG-Fe(II) oxy DC1; DNA oxidative demethylase ALKBH2; alkB, alkylation repair homolog 2; alkylated DNA repair protein alkB homolog 2; alpha-ketoglutarate-dependent dioxygenase alkB homolog 2; oxy DC1
ALKBH3	ALKBH3	alkB homolog 3, alpha-ketoglutarate dependent dioxygenase	alkB homolog 3, alpha-ketoglutaratedependent dioxygenase; alkB, alkylation repair homolog 3; alkylated DNA repair protein alkB homolog 3; alpha-ketoglutarate-dependent dioxygenase alkB homolog 3; prostate cancer antigen-1
ALKBH4	ALKBH4	alkB homolog 4, lysine demethylase	DNA N6-methyl adenine demethylase ALKBH4; alkB homolog 4, lysine demthylase; alkB, alkylation repair homolog 4; alkylated DNA repair protein alkB homolog 4; alpha-ketoglutarate-dependent dioxygenase alkB homolog 4; lysine-specific demethylase ALKBH4; probable alpha-ketoglutarate-dependent dioxygenase ABH4
ALKBH5	ALKBH5	alkB homolog 5, RNA demethylase	AlkB family member 5, RNA demethylase; RNA demethylase ALKBH5; alkB, alkylation repair homolog 5; alkylated DNA repair protein alkB homolog 5; alpha-ketoglutarate-dependent dioxygenase alkB homolog 5; oxoglutarate and iron-dependent oxygenase domain containing; probable alpha-ketoglutarate-dependent dioxygenase ABH5
ALKBH6	ALKBH6	alkB homolog 6	alkB, alkylation repair homolog 6; alkylated DNA repair protein alkB homolog 6; alkylation repair homolog 6; alpha-ketoglutarate-dependent dioxygenase alkB homolog 6; probable alpha-ketoglutarate-dependent dioxygenase ABH6
ALKBH7	ALKBH7	alkB homolog 7	alkB, alkylation repair homolog 7; alkylated DNA repair protein alkB homolog 7; alpha-ketoglutarate-dependent dioxygenase alkB homolog 7, mitochondrial; probable alpha-ketoglutarate-dependent dioxygenase ABH7; spermatogenesis associated 11; spermatogenesis cell proliferation related protein; spermatogenesis-associated protein 11
ALKBH8	ALKBH8	alkB homolog 8, tRNA methyltransferase	AlkB homologue 8; S-adenosyl-L-methionine-dependent tRNA methyltransferase ABH8; S-adenosyl-L-methionine-dependent tRNA methyltransferase ALKBH8; alkB, alkylation repair homolog 8; alkylated DNA repair protein alkB homolog 8; alpha-ketoglutarate-dependent dioxygenase ALKBH8; probable alpha-ketoglutarate-dependent dioxygenase ABH8; tRNA (carboxymethyluridine(34)-5-O)-methyltransferase ABH8; tRNA (…
ALLC	ALLC	allantoicase	allantoate amidinohydrolase; probable allantoicase; probable inactive allantoicase
ALMS1	ALMS1	ALMS1 centrosome and basal body associated protein	Alstrom syndrome 1; Alstrom syndrome protein 1; centrosome-associated protein ALMS1
ALOX12	ALOX12	arachidonate 12-lipoxygenase, 12S type	12S-lipoxygenase; Arachidonate 12-lipoxygenase, 12S-type; arachidonate (12S)-lipoxygenase; arachidonate (15S)-lipoxygenase; arachidonate 15-lipoxygenase,15S-type; linoleate 13S-lipoxygenase; lipoxin synthase 12-LO; platelet 12-LOX; platelet-type 12-lipoxygenase; platelet-type lipoxygenase 12; polyunsaturated fatty acid lipoxygenase ALOX12
ALOX12B	ALOX12B	arachidonate 12-lipoxygenase, 12R type	12R-lipoxygenase; arachidonate 12-lipoxygenase, 12R-type; epidermis-type lipoxygenase 12
ALOX15	ALOX15	arachidonate 15-lipoxygenase	12/15-lipoxygenase; 15-LOX type 1; 15-lipooxygenase-1; 15-lipoxygenase type 1; arachidonate 12-lipoxygenase, leukocyte-type; arachidonate omega-6 lipoxygenase; hepoxilin A3 synthase Alox15; linoleate 13S-lipoxygenase; polyunsaturated fatty acid lipoxygenase ALOX15
ALOX15B	ALOX15B	arachidonate 15-lipoxygenase type B	15-LOX-B; 15S-lipoxygenase; arachidonate 15-lipoxygenase 2; arachidonate 15-lipoxygenase type II; arachidonate 15-lipoxygenase, second type; arachidonate omega(6) lipoxygenase; linoleate 13-lipoxygenase 15-LOb; polyunsaturated fatty acid lipoxygenase ALOX15B
ALOX5	ALOX5	arachidonate 5-lipoxygenase	LOX-5; arachidonic acid 5-lipoxygenase; leukotriene A4 synthase; polyunsaturated fatty acid 5-lipoxygenase
ALOX5AP	ALOX5AP	arachidonate 5-lipoxygenase activating protein	MK-886-binding protein; arachidonate 5-lipoxygenase-activating protein
ALOXE3	ALOXE3	arachidonate epidermal lipoxygenase 3	Epidermal lipoxygenase-3; Lamellar ichthyosis 5; arachidonate lipoxygenase 3; e-LOX-3; epidermal LOX-3; epidermal lipoxygenase; epidermis-type lipoxygenase 3; hydroperoxide isomerase ALOXE3; hydroperoxy dehydratase ALOXE3; hydroperoxy icosatetraenoate dehydratase; hydroperoxy icosatetraenoate isomerase
ALPG	ALPG	alkaline phosphatase, germ cell	ALP-1; Nagao isozyme; alkaline phosphatase Nagao isozyme; alkaline phosphatase, germ cell type; alkaline phosphatase, placental like 2; alkaline phosphatase, placental-like; germ cell alkaline phosphatase; placental-like alkaline phosphatase; testicular and thymus alkaline phosphatase
ALPI	ALPI	alkaline phosphatase, intestinal	Kasahara isozyme; alkaline phosphomonoesterase; glycerophosphatase; intestinal alkaline phosphatase; intestinal-type alkaline phosphatase
ALPK1	ALPK1	alpha kinase 1	alpha-protein kinase 1; chromosome 4 kinase; lymphocyte alpha-kinase; lymphocyte alpha-protein kinase
ALPK2	ALPK2	alpha kinase 2	alpha-protein kinase 2; heart alpha-kinase; heart alpha-protein kinase
ALPK3	ALPK3	alpha kinase 3	alpha-protein kinase 3; muscle alpha-kinase; muscle alpha-protein kinase; myocyte induction differentiation originator
ALPL	ALPL	alkaline phosphatase, biomineralization associated	alkaline phosphatase liver/bone/kidney isozyme; alkaline phosphatase, liver/bone/kidney; alkaline phosphatase, tissue-nonspecific isozyme; liver/bone/kidney-type alkaline phosphatase; phosphoamidase; phosphocreatine phosphatase; tissue non-specific alkaline phosphatase; tissue-nonspecific ALP
ALPP	ALPP	alkaline phosphatase, placental	Intestinal alkaline phosphatase; Intestinal-type alkaline phosphatase; alkaline phosphatase Regan isozyme; alkaline phosphatase, placental type; alkaline phosphomonoesterase; glycerophosphatase; placental alkaline phosphatase 1
ALS2	ALS2	alsin Rho guanine nucleotide exchange factor ALS2	ALS2, alsin Rho guanine nucleotide exchange factor; alsin; amyotrophic lateral sclerosis 2 (juvenile); amyotrophic lateral sclerosis 2 chromosomal region candidate gene 6 protein; amyotrophic lateral sclerosis 2 protein
ALS2CL	ALS2CL	ALS2 C-terminal like	ALS2 C-terminal-like protein
ALX1	ALX1	ALX homeobox 1	ALX homeobox protein 1; CART-1; cartilage paired-class homeoprotein 1; epididymis luminal protein 23
ALX3	ALX3	ALX homeobox 3	aristaless-like homeobox 3; frontonasal dysplasia; homeobox protein aristaless-like 3; proline-rich transcription factor ALX3
ALX4	ALX4	ALX homeobox 4	aristaless-like homeobox 4; homeobox protein aristaless-like 4; homeodomain transcription factor ALX4
ALYREF	ALYREF	Aly/REF export factor	THO complex 4; THO complex subunit 4; ally of AML-1 and LEF-1; bZIP enhancing factor; bZIP-enhancing factor BEF; tho4; transcriptional coactivator Aly/REF
AMACR	AMACR	alpha-methylacyl-CoA racemase	2-methylacyl-CoA racemase; alpha-methylacyl-CoA racemase
AMBN	AMBN	ameloblastin	ameloblastin; enamel matrix protein
AMBP	AMBP	alpha-1-microglobulin/bikunin precursor	bikunin; complex-forming glycoprotein heterogeneous in charge; growth-inhibiting protein 19; inter-alpha-trypsin inhibitor light chain; protein AMBP; protein HC; trypstatin; uristatin; uronic-acid-rich protein
AMBRA1	AMBRA1	autophagy and beclin 1 regulator 1	DDB1 and CUL4 associated factor 3; WD repeat domain 94; activating molecule in BECN1-regulated autophagy protein 1; activating molecule in beclin-1-regulated autophagy; autophagy/beclin-1 regulator 1
AMD1	AMD1	adenosylmethionine decarboxylase 1	S-adenosylmethionine decarboxylase 1; S-adenosylmethionine decarboxylase proenzyme
AMDHD1	AMDHD1	amidohydrolase domain containing 1	amidohydrolase domain-containing protein 1; probable imidazolonepropionase
AMDHD2	AMDHD2	amidohydrolase domain containing 2	N-acetylglucosamine-6-phosphate deacetylase; amidohydrolase domain-containing protein 2; glcNAc 6-P deacetylase; putative N-acetylglucosamine-6-phosphate deacetylase
AMELX	AMELX	amelogenin X-linked	amelogenin (X chromosome, amelogenesis imperfecta 1); amelogenin (amelogenesis imperfecta 1, X-linked); amelogenin, X isoform
AMELY	AMELY	amelogenin Y-linked	amelogenin (Y chromosome); amelogenin, Y isoform
AMER1	AMER1	APC membrane recruitment protein 1	APC membrane recruitment protein 1; RP11-403E24.2; Wilms tumor gene on the X chromosome protein; Wilms tumor on the X; adenomatous polyposis coli membrane recruitment 1; family with sequence similarity 123B; protein FAM123B
AMER2	AMER2	APC membrane recruitment protein 2	APC membrane recruitment protein 2; family with sequence similarity 123A; protein FAM123A
AMER3	AMER3	APC membrane recruitment protein 3	APC membrane recruitment protein 3; family with sequence similarity 123C; protein FAM123C
AMFR	AMFR	autocrine motility factor receptor	E3 ubiquitin-protein ligase AMFR; RING finger protein 45; RING-type E3 ubiquitin transferase AMFR
AMH	AMH	anti-Mullerian hormone	Mullerian inhibiting factor; Mullerian inhibiting substance; anti-Muellerian hormone; muellerian-inhibiting factor; muellerian-inhibiting substance
AMHR2	AMHR2	anti-Mullerian hormone receptor type 2	AMH type II receptor; MIS type II receptor; Muellerian inhibiting substance type II receptor; Mullerian inhibiting substance type II receptor; anti-Muellerian hormone type II receptor; anti-Muellerian hormone type-2 receptor; anti-Mullerian hormone receptor, type II
AMIGO1	AMIGO1	adhesion molecule with Ig like domain 1	alivin-2; amphoterin-induced gene and ORF; amphoterin-induced protein 1
AMIGO2	AMIGO2	adhesion molecule with Ig like domain 2	alivin 1; amphoterin induced gene 2; amphoterin-induced protein 2; differentially expressed in gastric adenocarcinoma; differentially expressed in gastric adenocarcinomas; transmembrane protein AMIGO2
AMIGO3	AMIGO3	adhesion molecule with Ig like domain 3	alivin-3; amphoterin-induced gene and ORF 3; amphoterin-induced protein 3
AMMECR1	AMMECR1	AMMECR nuclear protein 1	AMME syndrome candidate gene 1 protein; nuclear protein AMMECR1
AMMECR1L	AMMECR1L	AMMECR1 like	AMME chromosomal region gene 1-like; AMMECR1-like protein
AMN	AMN	amnion associated transmembrane protein	amnionless homolog; protein amnionless; visceral endoderm-specific type 1 transmembrane protein
AMN1	AMN1	antagonist of mitotic exit network 1 homolog	protein AMN1 homolog
AMOT	AMOT	angiomotin	angiomotin
AMOTL1	AMOTL1	angiomotin like 1	angiomotin-like protein 1; junction-enriched and associated protein
AMOTL2	AMOTL2	angiomotin like 2	Leman coiled-coil protein; angiomotin-like protein 2
AMPD1	AMPD1	adenosine monophosphate deaminase 1	AMP deaminase 1; AMPD; adenosine monophosphate deaminase 1 (isoform M); adenosine monophosphate deaminase-1 (muscle); myoadenylate deaminase; skeletal muscle AMPD
AMPD2	AMPD2	adenosine monophosphate deaminase 2	AMP deaminase 2; adenosine monophosphate deaminase 2 (isoform L)
AMPD3	AMPD3	adenosine monophosphate deaminase 3	AMP aminohydrolase; AMP deaminase 3; adenosine monophosphate deaminase (isoform E); erythrocyte AMP deaminase; erythrocyte type AMP deaminase; erythrocyte-specific AMP deaminase; myoadenylate deaminase
AMPH	AMPH	amphiphysin	amphiphysin; amphiphysin (Stiff-Mann syndrome with breast cancer 128kD autoantigen); amphiphysin I
AMT	AMT	aminomethyltransferase	aminomethyltransferase, mitochondrial; glycine cleavage system T protein; nonketotic hyperglycinemia
AMTN	AMTN	amelotin	RSTI689; amelotin
AMY1C	AMY1A | AMY1B | AMY1C | AMY2A | AMY2B | LOC124905662 | LOC124905666 | LOC124905668 | LOC128966568 | LOC128966570	amylase alpha 1A | amylase alpha 1B | amylase alpha 1C | amylase alpha 2A | amylase alpha 2B | pancreatic alpha-amylase-like | alpha-amylase 1B | alpha-amylase 1B | alpha-amylase 1B | alpha-amylase 1B	1,4-alpha-D-glucan glucanohydrolase 1; alpha-amylase 1; alpha-amylase 1A; amylase alpha 1A (salivary); amylase, salivary, alpha-1A; glycogenase; salivary alpha-amylase; salivary amylase alpha 1A | 1,4-alpha-D-glucan glucanohydrolase 1; alpha-amylase 1; alpha-amylase 1A; alpha-amylase 1B; amylase alpha 1B (salivary); amylase, salivary, alpha-1B; glycogenase; salivary alpha-amylase; salivary amylas…
AMZ1	AMZ1	archaelysin family metallopeptidase 1	archaemetzincin-1; archeobacterial metalloproteinase-like protein 1; metalloproteinase-like protein
AMZ2	AMZ2	archaelysin family metallopeptidase 2	archaemetzincin-2; archaemetzincins-2; archeobacterial metalloproteinase-like protein 2
ANAPC1	ANAPC1	anaphase promoting complex subunit 1	anaphase-promoting complex 1 (meiotic checkpoint regulator); anaphase-promoting complex subunit 1; cyclosome subunit 1; mitotic checkpoint regulator; testis-specific gene 24 protein
ANAPC10	ANAPC10	anaphase promoting complex subunit 10	anaphase-promoting complex subunit 10; cyclosome subunit 10
ANAPC11	ANAPC11	anaphase promoting complex subunit 11	APC11 anaphase promoting complex subunit 11 homolog; anaphase promoting complex subunit 11 (yeast APC11 homolog); anaphase-promoting complex subunit 11; cyclosome subunit 11; hepatocellular carcinoma-associated RING finger protein
ANAPC13	ANAPC13	anaphase promoting complex subunit 13	anaphase-promoting complex subunit 13; cyclosome subunit 13
ANAPC15	ANAPC15	anaphase promoting complex subunit 15	anaphase-promoting complex subunit 15
ANAPC16	ANAPC16	anaphase promoting complex subunit 16	anaphase-promoting complex subunit 16; centromere protein 27; cyclosome subunit 16; metabolic syndrome-associated protein
ANAPC2	ANAPC2	anaphase promoting complex subunit 2	anaphase-promoting complex subunit 2; cyclosome subunit 2
ANAPC4	ANAPC4	anaphase promoting complex subunit 4	anaphase-promoting complex subunit 4; cyclosome subunit 4
ANAPC5	ANAPC5	anaphase promoting complex subunit 5	anaphase-promoting complex subunit 5; cyclosome subunit 5
ANAPC7	ANAPC7	anaphase promoting complex subunit 7	anaphase-promoting complex subunit 7; cyclosome subunit 7
ANG	ANG	angiogenin	Homo sapiens epididymis luminal protein 168; RNase 5; angiogenin; angiogenin, ribonuclease, RNase A family, 5; epididymis luminal protein 168; ribonuclease 5; ribonuclease A A1; ribonuclease A family member 5
ANGEL1	ANGEL1	angel homolog 1	protein angel homolog 1
ANGEL2	ANGEL2	angel homolog 2	protein angel homolog 2
ANGPT1	ANGPT1	angiopoietin 1	ANG-1; angiopoietin-1
ANGPT2	ANGPT2	angiopoietin 2	Tie2-ligand; angiopoietin-2; angiopoietin-2B; angiopoietin-2a
ANGPT4	ANGPT4	angiopoietin 4	angiopoietin-4
ANGPTL1	ANGPTL1	angiopoietin like 1	ANG-3; angioarrestin; angiopoietin 3; angiopoietin Y1; angiopoietin-like protein 1; angiopoietin-related protein 1; dJ595C2.2 (angiopoietin Y1)
ANGPTL2	ANGPTL2	angiopoietin like 2	angiopoietin-like protein 2; angiopoietin-related protein 2
ANGPTL3	ANGPTL3	angiopoietin like 3	angiopoietin 5; angiopoietin-related protein 3
ANGPTL4	ANGPTL4	angiopoietin like 4	PPARG angiopoietin related protein; angiopoietin-related protein 4; fasting-induced adipose factor; hepatic angiopoietin-related protein; hepatic fibrinogen/angiopoietin-related protein; peroxisome proliferator-activated receptor (PPAR) gamma induced angiopoietin-related protein
ANGPTL5	ANGPTL5	angiopoietin like 5	angiopoietin-like protein 5; angiopoietin-related protein 5
ANGPTL6	ANGPTL6	angiopoietin like 6	angiopoietin-like protein 6; angiopoietin-related growth factor; angiopoietin-related protein 5; angiopoietin-related protein 6
ANGPTL7	ANGPTL7	angiopoietin like 7	angiopoietin-like factor (CDT6); angiopoietin-like protein 7; angiopoietin-related protein 7; cornea-derived transcript 6 protein
ANGPTL8	ANGPTL8	angiopoietin like 8	angiopoietin-like protein 8; hepatocellular carcinoma-associated gene TD26; hepatocellular carcinoma-associated protein TD26; lipasin; refeeding-induced fat and liver protein
ANHX	ANHX	anomalous homeobox	anomalous homeobox protein
ANK1	ANK1	ankyrin 1	ANK-1; ankyrin 1, erythrocytic; ankyrin-1; ankyrin-R; erythrocyte ankyrin
ANK2	ANK2	ankyrin 2	ankyrin 2, neuronal; ankyrin B; ankyrin, brain; ankyrin-2; ankyrin-2, nonerythrocytic; non-erythroid ankyrin
ANK3	ANK3	ankyrin 3	ankyrin 3, node of Ranvier (ankyrin G); ankyrin-3
ANKAR	ANKAR	ankyrin and armadillo repeat containing	ankyrin and armadillo repeat-containing protein
ANKDD1A	ANKDD1A	ankyrin repeat and death domain containing 1A	ankyrin repeat and death domain-containing protein 1A
ANKDD1B	ANKDD1B	ankyrin repeat and death domain containing 1B	ankyrin repeat and death domain-containing protein 1B; ankyrin repeat and death domain-containing protein ENSP00000345065
ANKEF1	ANKEF1	ankyrin repeat and EF-hand domain containing 1	ankyrin repeat and EF-hand domain-containing protein 1; ankyrin repeat domain-containing protein 5
ANKFN1	ANKFN1	ankyrin repeat and fibronectin type III domain containing 1	ankyrin repeat and fibronectin type-III domain-containing protein 1
ANKFY1	ANKFY1	ankyrin repeat and FYVE domain containing 1	Rabankyrin-5; ankyrin repeat and FYVE domain-containing protein 1; ankyrin repeat hooked to zinc finger motif; ankyrin repeats hooked to a zinc finger motif; rabankyrin-5; rank-5
ANKH	ANKH	ANKH inorganic pyrophosphate transport regulator	ATP carrier protein ANKH; ankylosis, progressive homolog; mineralization regulator ANKH; progressive ankylosis protein homolog; solute carrier family 62, member 1
ANKHD1	ANKHD1 | ANKHD1-EIF4EBP3	ankyrin repeat and KH domain containing 1 | ANKHD1-EIF4EBP3 readthrough	HIV-1 Vpr-binding ankyrin repeat protein; ankyrin repeat and KH domain-containing protein 1; multiple ankyrin repeats, single KH-domain homolog | ANKHD1-EIF4EBP3 protein; MASK-4E-BP3 alternate reading frame
ANKIB1	ANKIB1	ankyrin repeat and IBR domain containing 1	ankyrin repeat and IBR domain-containing protein 1
ANKK1	ANKK1	ankyrin repeat and kinase domain containing 1	X-kinase; ankyrin repeat and protein kinase domain-containing protein 1; protein kinase PKK2; sugen kinase 288
ANKLE1	ANKLE1	ankyrin repeat and LEM domain containing 1	LEM domain containing 6; LEM-domain containing 3; ankyrin repeat and LEM domain-containing protein 1; ankyrin repeat domain-containing protein 41
ANKLE2	ANKLE2	ankyrin repeat and LEM domain containing 2	LEM domain containing 7; LEM domain-containing protein 4; LEM-domain protein 4; ankyrin repeat and LEM domain-containing protein 2
ANKMY1	ANKMY1	ankyrin repeat and MYND domain containing 1	ankyrin repeat and MYND domain-containing protein 1; testis-specific ankyrin-like protein 1; zinc finger MYND domain-containing protein 13
ANKMY2	ANKMY2	ankyrin repeat and MYND domain containing 2	ankyrin repeat and MYND domain-containing protein 2
ANKRA2	ANKRA2	ankyrin repeat family A member 2	RFXANK-like protein 2; ankyrin repeat family A protein 2; ankyrin repeat, family A (RFXANK-like), 2
ANKRD1	ANKRD1	ankyrin repeat domain 1	ankyrin repeat domain 1 (cardiac muscle); ankyrin repeat domain-containing protein 1; cardiac ankyrin repeat protein; cytokine-inducible gene C-193 protein; cytokine-inducible nuclear protein; epididymis secretory sperm binding protein; liver ankyrin repeat domain 1
ANKRD10	ANKRD10	ankyrin repeat domain 10	ankyrin repeat domain-containing protein 10
ANKRD11	ANKRD11	ankyrin repeat domain containing 11	ankyrin repeat domain 11; ankyrin repeat domain-containing protein 11; ankyrin repeat-containing cofactor 1; ankyrin repeats containing cofactor 1; nasopharyngeal carcinoma susceptibility protein
ANKRD12	ANKRD12	ankyrin repeat domain 12	ankyrin repeat domain-containing protein 12; ankyrin repeat-containing cofactor 2; ankyrin repeats containing cofactor 2
ANKRD13A	ANKRD13A	ankyrin repeat domain 13A	NY-REN-25 antigen; ankyrin repeat domain-containing protein 13A
ANKRD13B	ANKRD13B	ankyrin repeat domain 13B	ankyrin repeat domain-containing protein 13B
ANKRD13C	ANKRD13C	ankyrin repeat domain 13C	ankyrin repeat domain-containing protein 13C
ANKRD13D	ANKRD13D	ankyrin repeat domain 13D	ankyrin repeat domain 13 family, member D; ankyrin repeat domain-containing protein 13D
ANKRD16	ANKRD16	ankyrin repeat domain 16	ankyrin repeat domain-containing protein 16
ANKRD17	ANKRD17	ankyrin repeat domain 17	ankyrin repeat domain-containing protein 17; gene trap ankyrin repeat protein; serologically defined breast cancer antigen NY-BR-16
ANKRD18A	ANKRD18A | ANKRD18B	ankyrin repeat domain 18A | ankyrin repeat domain 18B	ankyrin repeat domain-containing protein 18A | ankyrin repeat domain-containing protein 18B
ANKRD2	ANKRD2	ankyrin repeat domain 2	ankyrin repeat domain 2 (stretch responsive muscle); ankyrin repeat domain-containing protein 2; skeletal muscle ankyrin repeat protein
ANKRD20A1	ANKRD20A1 | ANKRD20A21P | ANKRD20A5P | LOC128966611	ankyrin repeat domain 20 family member A1 | ankyrin repeat domain 20 family member A21, pseudogene | | putative ankyrin repeat domain-containing protein 20A2	ankyrin repeat domain 20A; ankyrin repeat domain-containing protein 20A1; epididymis secretory sperm binding protein | | | ankyrin repeat domain-containing protein 20A1-like; putative ankyrin repeat domain-containing protein 20A2
ANKRD22	ANKRD22	ankyrin repeat domain 22	ankyrin repeat domain-containing protein 22
ANKRD23	ANKRD23	ankyrin repeat domain 23	ankyrin repeat domain-containing protein 23; diabetes related ankyrin repeat protein; muscle ankyrin repeat protein 3
ANKRD24	ANKRD24	ankyrin repeat domain 24	ankyrin repeat domain-containing protein 24
ANKRD26	ANKRD26	ankyrin repeat domain containing 26	GNS/ANKRD26/NCKAP1L fusion; ankyrin repeat domain 26; ankyrin repeat domain-containing protein 26
ANKRD27	ANKRD27	ankyrin repeat domain 27	VPS9 domain-containing protein; VPS9-ankyrin-repeat protein; Vps9 domain and ankyrin-repeat-containing protein; ankyrin repeat domain 27 (VPS9 domain); ankyrin repeat domain-containing protein 27
ANKRD28	ANKRD28	ankyrin repeat domain 28	PP6-ARS-A; ankyrin repeat domain-containing protein 28; phosphatase interactor targeting K protein; phosphatase interactor targeting protein hnRNP K; protein phosphatase 1, regulatory subunit 65; protein phosphatase 6 ankyrin repeat subunit A; serine/threonine-protein phosphatase 6 regulatory ankyrin repeat subunit A; serine/threonine-protein phosphatase 6 regulatory subunit ARS-A
ANKRD29	ANKRD29	ankyrin repeat domain 29	ankyrin repeat domain-containing protein 29
ANKRD30A	ANKRD30A	ankyrin repeat domain 30A	ankyrin repeat domain-containing protein 30A; serologically defined breast cancer antigen NY-BR-1
ANKRD30B	ANKRD30B	ankyrin repeat domain 30B	ankyrin repeat domain-containing protein 30B; serologically defined breast cancer antigen NY-BR-1.1
ANKRD30BL	ANKRD30BL	ankyrin repeat domain 30B like	ankyrin repeat domain 30B pseudogene 3; putative ankyrin repeat domain-containing protein 30B-like
ANKRD31	ANKRD31	ankyrin repeat domain 31	ankyrin repeat domain-containing protein 31; putative ankyrin repeat domain-containing protein 31
ANKRD33	ANKRD33	ankyrin repeat domain 33	ankyrin repeat domain-containing protein 33; photoreceptor ankyrin repeat protein
ANKRD33B	ANKRD33B	ankyrin repeat domain 33B	Ankyrin repeat domain-containing protein LOC651746; ankyrin repeat domain-containing protein 33B
ANKRD34A	ANKRD34A	ankyrin repeat domain 34A	ankyrin repeat domain 34; ankyrin repeat domain-containing protein 34A
ANKRD34B	ANKRD34B	ankyrin repeat domain 34B	ankyrin repeat domain-containing protein 34B; cytosolic phosphoprotein DP58; dendritic phosphoprotein 58 kDa
ANKRD34C	ANKRD34C	ankyrin repeat domain 34C	ankyrin repeat domain-containing protein 34C
ANKRD35	ANKRD35	ankyrin repeat domain 35	ankyrin repeat domain-containing protein 35
ANKRD36	ANKRD36	ankyrin repeat domain 36	ankyrin repeat domain-containing protein 36; ankyrin repeat domain-containing protein 36A; ankyrin-related
ANKRD36C	ANKRD36C	ankyrin repeat domain 36C	ankyrin repeat domain-containing protein 36C; protein immuno-reactive with anti-PTH polyclonal antibodies
ANKRD37	ANKRD37	ankyrin repeat domain 37	ankyrin repeat domain-containing protein 37; low density lipoprotein receptor-related protein binding protein; low-density lipoprotein receptor-related protein 2-binding protein
ANKRD39	ANKRD39	ankyrin repeat domain 39	ankyrin repeat domain-containing protein 39
ANKRD40	ANKRD40	ankyrin repeat domain 40	ankyrin repeat domain-containing protein 40
ANKRD40CL	ANKRD40CL	ANKRD40 C-terminal like	long intergenic non-protein coding RNA 483; putative ANKRD40 C-terminal-like protein
ANKRD42	ANKRD42	ankyrin repeat domain 42	ankyrin repeat domain-containing protein 42; protein phosphatase 1, regulatory subunit 79; several ankyrin repeat protein
ANKRD44	ANKRD44	ankyrin repeat domain 44	ankyrin repeat domain-containing protein 44; serine/threonine-protein phosphatase 6 regulatory ankyrin repeat subunit B; serine/threonine-protein phosphatase 6 regulatory subunit ARS-B
ANKRD45	ANKRD45	ankyrin repeat domain 45	ankyrin repeat domain-containing protein 45; cancer/testis antigen 117
ANKRD46	ANKRD46	ankyrin repeat domain 46	ankyrin repeat domain-containing protein 46; ankyrin repeat small protein
ANKRD49	ANKRD49	ankyrin repeat domain 49	ankyrin repeat domain-containing protein 49; fetal globin-inducing factor
ANKRD50	ANKRD50	ankyrin repeat domain containing 50	ankyrin repeat domain 50; ankyrin repeat domain-containing protein 50
ANKRD52	ANKRD52	ankyrin repeat domain 52	CVWG5837; PP6-ARS-C; ankyrin repeat domain 33; ankyrin repeat domain-containing protein 52; protein phosphatase 6 ankyrin repeat subunit C; serine/threonine-protein phosphatase 6 regulatory ankyrin repeat subunit C; serine/threonine-protein phosphatase 6 regulatory subunit ARS-C
ANKRD53	ANKRD53	ankyrin repeat domain 53	ankyrin repeat domain-containing protein 53
ANKRD54	ANKRD54	ankyrin repeat domain 54	ankyrin repeat domain-containing protein 54; lyn-interacting ankyrin repeat protein
ANKRD55	ANKRD55	ankyrin repeat domain 55	ankyrin repeat domain-containing protein 55
ANKRD6	ANKRD6	ankyrin repeat domain 6	ankyrin repeat domain-containing protein 6; diego homolog; diversin; epididymis secretory sperm binding protein
ANKRD60	ANKRD60	ankyrin repeat domain 60	ankyrin repeat domain-containing protein 60
ANKRD61	ANKRD61	ankyrin repeat domain 61	ankyrin repeat domain-containing protein 61
ANKRD62	ANKRD62	ankyrin repeat domain 62	ankyrin repeat domain-containing protein 62
ANKRD63	ANKRD63	ankyrin repeat domain 63	ankyrin repeat domain-containing protein 63
ANKRD65	ANKRD65	ankyrin repeat domain 65	ankyrin repeat domain-containing protein 65
ANKRD66	ANKRD66	ankyrin repeat domain 66	ankyrin repeat domain-containing protein 66
ANKRD7	ANKRD7	ankyrin repeat domain 7	ankyrin repeat domain-containing protein 7; testicular tissue protein Li 19; testis-specific ankyrin motif containing protein; testis-specific protein TSA806
ANKRD9	ANKRD9	ankyrin repeat domain 9	ankyrin repeat domain-containing protein 9
ANKS1A	ANKS1A	ankyrin repeat and sterile alpha motif domain containing 1A	Odin; ankyrin repeat and SAM domain containing 1; ankyrin repeat and SAM domain-containing protein 1A
ANKS1B	ANKS1B	ankyrin repeat and sterile alpha motif domain containing 1B	E2a-Pbx1-associated protein; amyloid-beta precursor protein intracellular domain associated protein 1; ankyrin repeat and sterile alpha motif domain-containing protein 1B; cajalin 2
ANKS3	ANKS3	ankyrin repeat and sterile alpha motif domain containing 3	ankyrin repeat and SAM domain-containing protein 3
ANKS4B	ANKS4B	ankyrin repeat and sterile alpha motif domain containing 4B	ankyrin repeat and SAM domain-containing protein 4B; harmonin-interacting ankyrin-repeat containing protein
ANKS6	ANKS6	ankyrin repeat and sterile alpha motif domain containing 6	SAM domain-containing protein 6; ankyrin repeat and SAM domain-containing protein 6; ankyrin repeat domain 14; samCystin
ANKUB1	ANKUB1	ankyrin repeat and ubiquitin domain containing 1	protein ANKUB1
ANKZF1	ANKZF1	ankyrin repeat and zinc finger peptidyl tRNA hydrolase 1	ankyrin repeat and zinc finger domain containing 1; ankyrin repeat and zinc finger domain-containing protein 1; tRNA endonuclease ANKZF1; zinc finger protein 744
ANLN	ANLN	anillin, actin binding protein	anillin
ANO1	ANO1	anoctamin 1	Ca2+-activated Cl- channel; anoctamin 1, calcium activated chloride channel; anoctamin-1; calcium activated chloride channel; discovered on gastrointestinal stromal tumors protein 1; oral cancer overexpressed 2; transmembrane protein 16A (eight membrane-spanning domains); tumor-amplified and overexpressed sequence 2
ANO10	ANO10	anoctamin 10	anoctamin-10; transmembrane protein 16K
ANO2	ANO2	anoctamin 2	anoctamin 2, calcium activated chloride channel; anoctamin-2; transmembrane protein 16B (eight membrane-spanning domains)
ANO3	ANO3	anoctamin 3	anoctamin-3; dystonia 23; transmembrane protein 16C (eight membrane-spanning domains)
ANO4	ANO4	anoctamin 4	anoctamin-4; transmembrane protein 16D
ANO5	ANO5	anoctamin 5	anoctamin-5; gnathodiaphyseal dysplasia 1 protein; integral membrane protein GDD1; transmembrane protein 16E
ANO6	ANO6	anoctamin 6	SCAN channel; anoctamin-6; small-conductance calcium-activated nonselective cation channel; transmembrane protein 16F
ANO7	ANO7	anoctamin 7	Dresden-transmembrane protein of the prostate; anoctamin-7; prostate cancer associated protein 5; transmembrane protein 16G
ANO8	ANO8	anoctamin 8	anoctamin-8; transmembrane protein 16H
ANO9	ANO9	anoctamin 9	anoctamin-9; p53-induced gene 5 protein; transmembrane protein 16J; tumor protein p53-inducible protein 5
ANOS1	ANOS1	anosmin 1	Kallmann syndrome interval gene 1; Kallmann syndrome-1 sequence (anosmin-1); WAP four-disulfide core domain 19; adhesion molecule-like X-linked; anosmin-1; kallmann syndrome protein
ANP32A	ANP32A	acidic nuclear phosphoprotein 32 family member A	acidic (leucine-rich) nuclear phosphoprotein 32 family, member A; acidic leucine-rich nuclear phosphoprotein 32 family member A; acidic nuclear phosphoprotein pp32; cerebellar leucine rich acidic nuclear protein; epididymis secretory sperm binding protein; hepatopoietin Cn; inhibitor-1 of protein phosphatase-2A; leucine-rich acidic nuclear protein; mapmodulin; potent heat-stable protein phosphata…
ANP32B	ANP32B	acidic nuclear phosphoprotein 32 family member B	acidic (leucine-rich) nuclear phosphoprotein 32 family, member B; acidic leucine-rich nuclear phosphoprotein 32 family member B; acidic protein rich in leucines; putative HLA-DR-associated protein I-2; silver-stainable protein SSP29
ANP32D	ANP32D	acidic nuclear phosphoprotein 32 family member D	acidic (leucine-rich) nuclear phosphoprotein 32 family, member D; acidic leucine-rich nuclear phosphoprotein 32 family member D; acidic nuclear phosphoprotein 32D; phosphoprotein 32-related protein 2; pp32 related 2; tumorigenic protein pp32r2
ANP32E	ANP32E	acidic nuclear phosphoprotein 32 family member E	LANP-like protein; acidic (leucine-rich) nuclear phosphoprotein 32 family, member E; acidic leucine-rich nuclear phosphoprotein 32 family member E; leucine-rich acidic nuclear protein like
ANPEP	ANPEP	alanyl aminopeptidase, membrane	alanyl (membrane) aminopeptidase; aminopeptidase M; aminopeptidase N; membrane alanyl aminopeptidase; microsomal aminopeptidase; myeloid plasma membrane glycoprotein CD13
ANTKMT	ANTKMT	adenine nucleotide translocase lysine methyltransferase	adenine nucleotide translocase lysine N-methyltransferase; family with sequence similarity 173 member A; protein FAM173A; protein N-lysine methyltransferase FAM173A
ANTXR1	ANTXR1	ANTXR cell adhesion molecule 1	2310008J16Rik; 2810405N18Rik; anthrax toxin receptor 1; tumor endothelial marker 8
ANTXR2	ANTXR2	ANTXR cell adhesion molecule 2	anthrax toxin receptor 2; capillary morphogenesis gene 2 protein; capillary morphogenesis protein 2
ANTXRL	ANTXRL	ANTXR like	anthrax toxin receptor like; anthrax toxin receptor-like
ANXA1	ANXA1	annexin A1	annexin A1; annexin I (lipocortin I); annexin-1; calpactin II; calpactin-2; chromobindin-9; epididymis secretory sperm binding protein; phospholipase A2 inhibitory protein
ANXA10	ANXA10	annexin A10	annexin 14; annexin A10; annexin-10
ANXA11	ANXA11	annexin A11	56 kDa autoantigen; annexin A11; annexin XI; annexin-11; calcyclin-associated annexin 50; epididymis secretory sperm binding protein
ANXA13	ANXA13	annexin A13	annexin A13; annexin XIII; annexin, intestine-specific; annexin-13; intestine-specific annexin
ANXA2	ANXA2	annexin A2	annexin A2; annexin II; annexin-2; calpactin I heavy chain; calpactin I heavy polypeptide; calpactin-1 heavy chain; chromobindin 8; epididymis secretory protein Li 270; epididymis secretory sperm binding protein; lipocortin II; placental anticoagulant protein IV; protein I
ANXA2R	ANXA2R	annexin A2 receptor	annexin II receptor; annexin-2 receptor
ANXA3	ANXA3	annexin A3	35-alpha calcimedin; Annexin III (lipocortin III); PAP-III; annexin A3; annexin III (lipocortin III, 1,2-cyclic-inositol-phosphate phosphodiesterase, placental anticoagulant protein III, calcimedin 35-alpha); annexin-3; calcimedin 35-alpha; inositol 1,2-cyclic phosphate 2-phosphohydrolase; lipocortin III; placental anticoagulant protein III
ANXA4	ANXA4	annexin A4	35-beta calcimedin; annexin A4; annexin IV (placental anticoagulant protein II); annexin-4; carbohydrate-binding protein p33/p41; chromobindin-4; endonexin I; epididymis secretory protein Li 274; lipocortin IV; placental anticoagulant protein II; proliferation-inducing gene 28; proliferation-inducing protein 28; protein II
ANXA5	ANXA5	annexin A5	CBP-I; PAP-I; VAC-alpha; anchorin CII; annexin A5; annexin V; annexin-5; calphobindin I; endonexin II; epididymis secretory protein Li 7; lipocortin V; placental anticoagulant protein 4; placental anticoagulant protein I; thromboplastin inhibitor; vascular anticoagulant-alpha
ANXA6	ANXA6	annexin A6	67 kDa calelectrin; annexin A6; annexin VI (p68); annexin-6; calcium-binding protein p68; calelectrin; calphobindin II; chromobindin-20; lipocortin VI; testis secretory sperm-binding protein Li 198a
ANXA7	ANXA7	annexin A7	annexin A7; annexin VII; annexin-7
ANXA8	ANXA8 | ANXA8L1	annexin A8 | annexin A8 like 1	VAC-beta; annexin A8; annexin VIII; annexin-8; vascular anticoagulant-beta | annexin A8-like protein 1; annexin A8-like protein 2; annexin A8L2; annexin VIII; annexin-8; vascular anticoagulant-beta
ANXA9	ANXA9	annexin A9	annexin 31; annexin A9; annexin XXXI; annexin-9; pemphaxin
AOAH	AOAH	acyloxyacyl hydrolase	acyloxyacyl hydrolase; acyloxyacyl hydrolase (neutrophil)
AOC1	AOC1	amine oxidase copper containing 1	amiloride binding protein 1 (amine oxidase (copper-containing)); amiloride-binding protein 1; amiloride-sensitive amine oxidase; amine oxidase copper domain-containing protein 1; diamine oxidase; diamine oxidase [copper-containing]; histaminase; kidney amine oxidase
AOC2	AOC2	amine oxidase copper containing 2	amine oxidase [copper-containing] 2; amine oxidase, copper containing 2 (retina-specific); retina-specific copper amine oxidase; semicarbazide-sensitive amine oxidase
AOC3	AOC3	amine oxidase copper containing 3	amine oxidase [copper-containing] 3; amine oxidase, copper containing 3 (vascular adhesion protein 1); copper amine oxidase; membrane primary amine oxidase; placenta copper monamine oxidase; semicarbazide-sensitive amine oxidase
AOPEP	AOPEP	aminopeptidase O (putative)	aminopeptidase O
AOX1	AOX1	aldehyde oxidase 1	aldehyde oxidase; azaheterocycle hydroxylase
AP1AR	AP1AR	adaptor related protein complex 1 associated regulatory protein	AP-1 complex-associated regulatory protein; adapter-related protein complex 1-associated regulatory protein; gadkin; gamma-1-adaptin brefeldin A resistance protein; gamma-A1-adaptin and kinesin interactor; gamma1-adaptin brefeldin A resistance protein, gamma-BAR
AP1B1	AP1B1	adaptor related protein complex 1 subunit beta 1	ADTB1, CLAPB2; AP-1 complex subunit beta-1; Golgi adaptor HA1/AP1 adaptin beta subunit; adapter-related protein complex 1 subunit beta-1; adaptor protein complex AP-1 subunit beta-1; adaptor related protein complex 1 beta 1 subunit; beta-1-adaptin; beta-adaptin 1; beta-prime-adaptin; beta1-adaptin; clathrin assembly protein complex 1 beta large chain; plasma membrane adaptor HA2/AP2 adaptor beta …
AP1G1	AP1G1	adaptor related protein complex 1 subunit gamma 1	AP-1 complex subunit gamma-1; adapter-related protein complex 1 subunit gamma-1; adaptor protein complex AP-1 subunit gamma-1; adaptor related protein complex 1 gamma 1 subunit; clathrin assembly protein complex 1 gamma large chain; clathrin assembly protein complex 1 gamma-1 large chain; clathrin-associated/assembly/adaptor protein, large, gamma 1; gamma adaptin; gamma1-adaptin; golgi adaptor HA…
AP1G2	AP1G2	adaptor related protein complex 1 subunit gamma 2	AP-1 complex subunit gamma-like 2; adaptor related protein complex 1 gamma 2 subunit; clathrin-associated/assembly/adaptor protein, large, gamma-2; gamma2-adaptin
AP1M1	AP1M1	adaptor related protein complex 1 subunit mu 1	AP-1 complex subunit mu-1; AP-mu chain family member mu1A; HA1 47 kDa subunit; adapter-related protein complex 1 subunit mu-1; adaptor protein complex AP-1 mu-1 subunit; adaptor protein complex AP-1 subunit mu-1; adaptor related protein complex 1 mu 1 subunit; clathrin adaptor protein AP47; clathrin assembly protein complex 1 medium chain 1; clathrin assembly protein complex 1 mu-1 medium chain 1…
AP1M2	AP1M2	adaptor related protein complex 1 subunit mu 2	AP-1 complex subunit mu-2; AP-mu chain family member mu1B; HA1 47 kDa subunit 2; adaptor protein complex AP-1 mu-2 subunit; adaptor related protein complex 1 mu 2 subunit; clathrin assembly protein complex 1 mu-2 medium chain 2; clathrin coat assembly protein AP47 2; clathrin coat associated protein AP47 2; clathrin-associated adaptor medium chain mu2; golgi adaptor AP-1 47 kDa protein; golgi ada…
AP1S1	AP1S1	adaptor related protein complex 1 subunit sigma 1	AP-1 complex subunit sigma-1A; HA1 19 kDa subunit; adapter-related protein complex 1 sigma-1A subunit; adaptor protein complex AP-1 subunit sigma-1A; adaptor related protein complex 1 sigma 1 subunit; adaptor-related protein complex 1 subunit sigma-1A; clathrin assembly protein complex 1 sigma-1A small chain; clathrin coat assembly protein AP19; clathrin-associated/assembly/adaptor protein, small…
AP1S2	AP1S2 | LOC653653	adaptor related protein complex 1 subunit sigma 2 | adaptor related protein complex 1 subunit sigma 2 pseudogene	AP-1 complex subunit sigma-2; adapter-related protein complex 1 sigma-1B subunit; adaptor protein complex AP-1 sigma-1B subunit; adaptor related protein complex 1 sigma 2 subunit; adaptor-related protein complex 1 subunit sigma-1B; clathrin adaptor complex AP1 sigma 1B subunit; clathrin assembly protein complex 1 sigma-1B small chain; golgi adaptor HA1/AP1 adaptin sigma-1B subunit; sigma1B-adapti…
AP1S3	AP1S3	adaptor related protein complex 1 subunit sigma 3	AP-1 complex subunit sigma-3; adapter-related protein complex 1 subunit sigma-1C; adaptor protein complex AP-1 sigma-1C subunit; adaptor related protein complex 1 sigma 3 subunit; adaptor-related protein complex 1 subunit sigma-1C; clathrin assembly protein complex 1 sigma-1C small chain; golgi adaptor HA1/AP1 adaptin sigma-1C subunit; sigma 1C subunit of AP-1 clathrin
AP2A1	AP2A1	adaptor related protein complex 2 subunit alpha 1	100 kDa coated vesicle protein A; AP-2 complex subunit alpha-1; adapter-related protein complex 2 alpha-1 subunit; adapter-related protein complex 2 subunit alpha-1; adaptin, alpha A; adaptor protein complex AP-2 subunit alpha-1; adaptor related protein complex 2 alpha 1 subunit; alpha-adaptin A; alpha1-adaptin; clathrin assembly protein complex 2 alpha-A large chain; clathrin-associated/assembly…
AP2A2	AP2A2	adaptor related protein complex 2 subunit alpha 2	100 kDa coated vesicle protein C; AP-2 complex subunit alpha-2; adapter-related protein complex 2 subunit alpha-2; adaptin, alpha B; adaptor related protein complex 2 alpha 2 subunit; alpha-adaptin C; Huntingtin interacting protein J; alpha2-adaptin; clathrin assembly protein complex 2 alpha-C large chain; clathrin-associated/assembly/adaptor protein, large, alpha 2; huntingtin yeast partner J; h…
AP2B1	AP2B1	adaptor related protein complex 2 subunit beta 1	AP-2 complex subunit beta; adapter-related protein complex 2 beta subunit; adapter-related protein complex 2 subunit beta; adaptin, beta 2 (beta); adaptor protein complex AP-2 subunit beta; adaptor related protein complex 2 beta 1 subunit; adaptor-related protein complex 2 subunit beta; beta-2-adaptin; beta-adaptin; beta2-adaptin; clathrin assembly protein complex 2 beta large chain; clathrin-ass…
AP2M1	AP2M1	adaptor related protein complex 2 subunit mu 1	AP-2 complex subunit mu; AP-2 mu 2 chain; HA2 50 kDA subunit; adaptin-mu2; adaptor protein complex AP-2 subunit mu; adaptor related protein complex 2 mu 1 subunit; adaptor-related protein complex 2 subunit mu; clathrin adaptor complex AP2, mu subunit; clathrin assembly protein complex 2 medium chain; clathrin assembly protein complex 2 mu medium chain; clathrin coat adaptor protein AP50; clathrin…
AP2S1	AP2S1	adaptor related protein complex 2 subunit sigma 1	AP-2 complex subunit sigma; HA2 17 kDa subunit; adaptor protein complex AP-2 subunit sigma; adaptor related protein complex 2 sigma 1 subunit; clathrin assembly protein 2 sigma small chain; clathrin coat assembly protein AP17; clathrin coat-associated protein AP17; clathrin-associated/assembly/adaptor protein, small 2 (17kD); plasma membrane adaptor AP-2 17 kDa protein; sigma-2; sigma2-adaptin
AP3B1	AP3B1	adaptor related protein complex 3 subunit beta 1	AP-3 complex beta-3A subunit; AP-3 complex subunit beta-1; adaptor protein complex AP-3 subunit beta-1; adaptor related protein complex 3 beta 1 subunit; beta-3A; beta-3A-adaptin; clathrin assembly protein complex 3 beta-1 large chain
AP3B2	AP3B2	adaptor related protein complex 3 subunit beta 2	AP-3 complex subunit beta-2; Neuronal adaptin-like protein, beta-subunit; adaptor protein complex AP-3 subunit beta-2; adaptor related protein complex 3 beta 2 subunit; beta-3B-adaptin; clathrin assembly protein complex 3 beta-2 large chain; neuron-specific vesicle coat protein beta-NAP
AP3D1	AP3D1	adaptor related protein complex 3 subunit delta 1	AP-3 complex delta subunit, partial CDS; AP-3 complex subunit delta-1; adapter-related protein complex 3 subunit delta-1; adaptor related protein complex 3 delta 1 subunit; delta adaptin; subunit of putative vesicle coat adaptor complex AP-3
AP3M1	AP3M1	adaptor related protein complex 3 subunit mu 1	AP-3 adapter complex mu3A subunit; AP-3 complex subunit mu-1; adapter-related protein complex 3 mu-1 subunit; adaptor related protein complex 3 mu 1 subunit; clathrin adaptor complex AP3, mu-3A subunit; mu-adaptin 3A; mu3A-adaptin
AP3M2	AP3M2	adaptor related protein complex 3 subunit mu 2	AP-3 complex subunit mu-2; HA1 47 kDa subunit homolog 2; HA1 47kDA subunit homolog 2; adapter-related protein complex 3 mu-2 subunit; adapter-related protein complex 3 subunit mu-2; adaptor related protein complex 3 mu 2 subunit; clathrin assembly protein assembly protein complex 1 medium chain homolog 2; clathrin assembly protein assembly protein complex 3 mu-2 medium chain; clathrin coat assemb…
AP3S1	AP3S1	adaptor related protein complex 3 subunit sigma 1	AP-3 complex subunit sigma-1; adapter-related protein complex 3 subunit sigma-1; adaptor related protein complex 3 sigma 1 subunit; clathrin adaptor complex AP3, sigma-3A subunit; clathrin-associated/assembly/adapter protein, small 3; clathrin-associated/assembly/adaptor protein, small 3 (22kD); sigma-adaptin 3a
AP3S2	AP3S2	adaptor related protein complex 3 subunit sigma 2	AP-3 complex subunit sigma-2; AP-3 complex subunit sigma-3B; adapter-related protein complex 3 subunit sigma-2; adaptor complex sigma3B; adaptor related protein complex 3 sigma 2 subunit; clathrin-associated/assembly/adaptor protein, small 4, 22-kD; sigma-3B-adaptin; sigma-adaptin 3b
AP4B1	AP4B1	adaptor related protein complex 4 subunit beta 1	AP-4 adaptor complex subunit beta; AP-4 complex subunit beta-1; adaptor related protein complex 4 beta 1 subunit; beta 4 subunit of AP-4; beta4-adaptin; spastic paraplegia 47
AP4E1	AP4E1	adaptor related protein complex 4 subunit epsilon 1	AP-4 adaptor complex subunit epsilon; AP-4 complex subunit epsilon-1; adaptor related protein complex 4 epsilon 1 subunit; adaptor-related protein complex AP-4 epsilon; epsilon-adaptin
AP4M1	AP4M1	adaptor related protein complex 4 subunit mu 1	AP-4 adaptor complex mu subunit; AP-4 complex subunit mu-1; adapter-related protein complex 4 mu-1 subunit; adapter-related protein complex 4 subunit mu-1; adaptor related protein complex 4 mu 1 subunit; adaptor-related protein complex AP-4 mu4 subunit; mu subunit of AP-4; mu-adaptin-related protein-2; mu4; mu4-adaptin
AP4S1	AP4S1	adaptor related protein complex 4 subunit sigma 1	AP-4 adapter complex subunit sigma-1; AP-4 adaptor complex subunit sigma-1; AP-4 complex subunit sigma-1; adaptor related protein complex 4 sigma 1 subunit; clathrin-associated/assembly/adaptor protein, sigma 4; sigma-4-adaptin
AP5B1	AP5B1	adaptor related protein complex 5 subunit beta 1	AP-5 complex subunit beta; AP-5 complex subunit beta-1; adaptor related protein complex 5 beta 1 subunit; adaptor-related protein complex 5 beta subunit; beta5
AP5M1	AP5M1	adaptor related protein complex 5 subunit mu 1	AP-5 complex subunit mu; AP-5 complex subunit mu-1; MHD domain-containing death-inducing protein; MU-2/AP1M2 domain containing, death-inducing; Mu-2 related death-inducing; adapter-related protein complex 5 mu subunit; adapter-related protein complex 5 subunit mu-1; adaptor related protein complex 5 mu 1 subunit; mu-2-related death-inducing protein; putative HIV-1 infection-related protein
AP5S1	AP5S1	adaptor related protein complex 5 subunit sigma 1	AP-5 complex subunit sigma-1; adapter-related protein complex 5 sigma subunit; adaptor related protein complex 5 sigma 1 subunit; adaptor-related protein complex 5 sigma subunit; protein C20orf29; sigma5
AP5Z1	AP5Z1	adaptor related protein complex 5 subunit zeta 1	AP-5 complex subunit zeta-1; adapter-related protein complex 5 zeta subunit; adaptor related protein complex 5 zeta 1 subunit; adaptor-related protein complex 5 zeta subunit; zeta5
APAF1	APAF1	apoptotic peptidase activating factor 1	apoptotic protease-activating factor 1
APBA1	APBA1	amyloid beta precursor protein binding family A member 1	adapter protein X11alpha; adaptor protein X11alpha; amyloid beta (A4) precursor protein-binding, family A, member 1 (X11); amyloid-beta A4 precursor protein-binding family A member 1; mint-1; neuron-specific X11 protein; neuronal munc18-1-interacting protein 1; phosphotyrosine-binding/-interacting domain (PTB)-bearing protein
APBA2	APBA2	amyloid beta precursor protein binding family A member 2	X11-like protein; adapter protein X11beta; amyloid beta (A4) precursor protein-binding, family A, member 2 (X11-like); amyloid-beta A4 precursor protein-binding family A member 2; mint-2; neuron-specific X11L protein; neuronal munc18-1-interacting protein 2; phosphotyrosine-binding/-interacting domain (PTB)-bearing protein
APBA3	APBA3	amyloid beta precursor protein binding family A member 3	X11-like 2 protein; adapter protein X11gamma; amyloid beta (A4) precursor protein-binding, family A, member 3 (X11-like 2); amyloid-beta A4 precursor protein-binding family A member 3; mint-3; neuron-specific X11L2 protein; neuronal munc18-1-interacting protein 3; phosphotyrosine-binding/-interacting domain (PTB)-bearing protein
APBB1	APBB1	amyloid beta precursor protein binding family B member 1	adaptor protein FE65a2; amyloid beta (A4) precursor protein-binding, family B, member 1 (Fe65); amyloid beta precursor protein binding family B member 1; stat-like protein
APBB1IP	APBB1IP	amyloid beta precursor protein binding family B member 1 interacting protein	APBB1-interacting protein 1; MLLT10/APBB1IP reciprocal fusion; MLLT10/APBB1IP reciprocal fusion protein; PREL-1; RARP-1; Rap1-GTP-interacting adaptor molecule; Rap1-interacting adaptor molecule; amyloid beta A4 precursor protein-binding family B member 1-interacting protein; proline rich EVH1 ligand 1; proline-rich protein 73; rap1-GTP-interacting adapter molecule; retinoic acid-responsive prolin…
APBB2	APBB2	amyloid beta precursor protein binding family B member 2	Fe65-like 1; amyloid beta precursor protein binding family B member 2; protein Fe65-like 1
APBB3	APBB3	amyloid beta precursor protein binding family B member 3	FE65-like protein 2; amyloid beta (A4) precursor protein-binding, family B, member 3; amyloid precursor interacting protein; amyloid-beta A4 precursor protein-binding family B member 3; protein Fe65-like 2
APC	APC	APC regulator of WNT signaling pathway	APC, WNT signaling pathway regulator; WNT signaling pathway regulator; adenomatosis polyposis coli tumor suppressor; adenomatous polyposis coli (APC); adenomatous polyposis coli protein; deleted in polyposis 2.5; epididymis secretory sperm binding protein; protein phosphatase 1, regulatory subunit 46
APC2	APC2	APC regulator of WNT signaling pathway 2	APC2, WNT signaling pathway regulator; adenomatosis polyposis coli 2; adenomatous polyposis coli like; adenomatous polyposis coli protein 2
APCDD1	APCDD1	APC down-regulated 1	adenomatosis polyposis coli down-regulated 1 protein; hypoptrichosis simplex; protein APCDD1
APCDD1L	APCDD1L	APC down-regulated 1 like	adenomatosis polyposis coli down-regulated 1 like; protein APCDD1-like
APCS	APCS	amyloid P component, serum	9.5S alpha-1-glycoprotein; epididymis secretory sperm binding protein Li 92n; pentaxin-related; pentraxin-2; pentraxin-related; serum amyloid P-component
APEH	APEH	acylaminoacyl-peptide hydrolase	N-acylaminoacyl-peptide hydrolase; acyl-peptide hydrolase; acylamino-acid-releasing enzyme; acylaminoacyl-peptidase; oxidized protein hydrolase
APELA	APELA	apelin receptor early endogenous ligand	apelin receptor early endogenous ligand; protein Elabela; protein Toddler
APEX1	APEX1	apurinic/apyrimidinic endodeoxyribonuclease 1	AP endonuclease class I; AP lyase; APEX nuclease (multifunctional DNA repair enzyme) 1; DNA repair nuclease/redox regulator APEX1; DNA-(apurinic or apyrimidinic site) endonuclease; DNA-(apurinic or apyrimidinic site) lyase; apurinic-apyrimidinic endonuclease 1; apurinic/apyrimidinic (abasic) endonuclease; deoxyribonuclease (apurinic or apyrimidinic); protein REF-1; redox factor-1
APEX2	APEX2	apurinic/apyrimidinic endodeoxyribonuclease 2	AP endonuclease 2; AP endonuclease XTH2; APEX nuclease (apurinic/apyrimidinic endonuclease) 2; DNA-(apurinic or apyrimidinic site) endonuclease 2; DNA-(apurinic or apyrimidinic site) lyase 2; apurinic/apyrimidinic endonuclease-like 2; zinc finger, GRF-type containing 2
APH1A	APH1A	aph-1 homolog A, gamma-secretase subunit	APH1A gamma secretase subunit; anterior pharynx defective 1 homolog A; aph-1alpha; gamma-secretase subunit APH-1A; presenilin-stabilization factor
APH1B	APH1B	aph-1 homolog B, gamma-secretase subunit	APH1B gamma secretase subunit; anterior pharynx defective 1 homolog B; gamma-secretase subunit APH-1B
API5	API5	apoptosis inhibitor 5	FIF; antiapoptosis clone 11 protein; apoptosis inhibitor 5; cell migration-inducing gene 8 protein; fibroblast growth factor 2-interacting factor 2; migration-inducing protein MIG8
APIP	APIP	APAF1 interacting protein	MTRu-1-P dehydratase; methylthioribulose-1-phosphate dehydratase; probable methylthioribulose-1-phosphate dehydratase
APLF	APLF	aprataxin and PNKP like factor	PNK and APTX-like FHA domain-containing protein; PNK and APTX-like FHA protein; XRCC1-interacting protein 1; aprataxin and PNK-like factor; aprataxin- and PNK-like factor; apurinic-apyrimidinic endonuclease APLF; zinc finger, CX5CX6HX5H motif containing 1
APLN	APLN	apelin	AGTRL1 ligand; APJ endogenous ligand; apelin
APLNR	APLNR	apelin receptor	APJ (apelin) receptor; APJ receptor; G protein-coupled receptor APJ; G-protein coupled receptor HG11; HG11 orphan receptor; angiotensin II receptor-like 1; angiotensin receptor-like 1; apelin receptor
APLP1	APLP1	amyloid beta precursor like protein 1	amyloid beta (A4) precursor-like protein 1; amyloid beta precursor like protein 1; amyloid precursor-like protein 1; amyloid-like protein 1
APLP2	APLP2	amyloid beta precursor like protein 2	CDEI box-binding protein; amyloid beta (A4) precursor-like protein 2; amyloid beta precursor like protein 2; amyloid precursor protein homolog HSD-2; sperm membrane protein YWK-II; testicular tissue protein Li 23
APMAP	APMAP	adipocyte plasma membrane associated protein	adipocyte plasma membrane-associated protein; protein BSCv
APOA1	APOA1	apolipoprotein A1	apo-AI; apolipoprotein A-I; epididymis secretory sperm binding protein
APOA2	APOA2	apolipoprotein A2	apolipoprotein A-II
APOA4	APOA4	apolipoprotein A4	apo-AIV; apoA-IV; apolipoprotein A-IV
APOA5	APOA5	apolipoprotein A5	apo-AV; apolipoprotein A-V; regeneration-associated protein 3
APOB	APOB	apolipoprotein B	apolipoprotein B (including Ag(x) antigen); apolipoprotein B-100; apolipoprotein B48
APOBEC1	APOBEC1	apolipoprotein B mRNA editing enzyme catalytic subunit 1	C->U-editing enzyme APOBEC-1; apolipoprotein B mRNA editing enzyme complex-1; apolipoprotein B mRNA editing enzyme, catalytic polypeptide 1; apolipoprotein B mRNA-editing enzyme 1; mRNA(cytosine(6666)) deaminase 1
APOBEC2	APOBEC2	apolipoprotein B mRNA editing enzyme catalytic subunit 2	C->U-editing enzyme APOBEC-2; apolipoprotein B mRNA editing enzyme, catalytic polypeptide 2; apolipoprotein B mRNA editing enzyme, catalytic polypeptide-like 2; mRNA(cytosine(6666)) deaminase 2; probable C->U-editing enzyme APOBEC-2
APOBEC3A	APOBEC3A	apolipoprotein B mRNA editing enzyme catalytic subunit 3A	DNA dC->dU-editing enzyme APOBEC-3A; apolipoprotein B mRNA editing enzyme, catalytic polypeptide-like 3A; phorbolin-1; probable DNA dC->dU-editing enzyme APOBEC-3A
APOBEC3B	APOBEC3B	apolipoprotein B mRNA editing enzyme catalytic subunit 3B	DNA dC->dU-editing enzyme APOBEC-3B; apolipoprotein B mRNA editing enzyme, catalytic polypeptide-like 3B; cytidine deaminase; phorbolin 2; phorbolin 3; phorbolin-1-related protein; phorbolin-2/3; probable DNA dC->dU-editing enzyme APOBEC-3B
APOBEC3C	APOBEC3C	apolipoprotein B mRNA editing enzyme catalytic subunit 3C	DNA dC->dU-editing enzyme APOBEC-3C; apolipoprotein B editing enzyme catalytic polypeptide-like 3C; apolipoprotein B mRNA editing enzyme, catalytic polypeptide-like 3C; phorbolin I; probable DNA dC->dU-editing enzyme APOBEC-3C
APOBEC3D	APOBEC3D	apolipoprotein B mRNA editing enzyme catalytic subunit 3D	DNA dC->dU-editing enzyme APOBEC-3D; apolipoprotein B mRNA editing enzyme, catalytic polypeptide-like 3D; apolipoprotein B mRNA editing enzyme, catalytic polypeptide-like 3E pseudogene; probable DNA dC->dU-editing enzyme APOBEC-3D
APOBEC3F	APOBEC3F | APOBEC3G	apolipoprotein B mRNA editing enzyme catalytic subunit 3F | apolipoprotein B mRNA editing enzyme catalytic subunit 3G	DNA dC->dU-editing enzyme APOBEC-3F; apolipoprotein B editing enzyme catalytic polypeptide-like 3F; apolipoprotein B mRNA editing enzyme cytidine deaminase; apolipoprotein B mRNA-editing enzyme catalytic polypeptide-like 3F; induced upon T-cell activation | APOBEC-related cytidine deaminase; APOBEC-related protein 9; DNA dC->dU editing enzyme; DNA dC->dU-editing enzyme APOBEC-3G; apolipoprotein B…
APOBEC3G	APOBEC3G	apolipoprotein B mRNA editing enzyme catalytic subunit 3G	APOBEC-related cytidine deaminase; APOBEC-related protein 9; DNA dC->dU editing enzyme; DNA dC->dU-editing enzyme APOBEC-3G; apolipoprotein B editing enzyme catalytic polypeptide-like 3G; apolipoprotein B mRNA editing enzyme cytidine deaminase; apolipoprotein B mRNA editing enzyme, catalytic polypeptide-like 3G; apolipoprotein B mRNA-editing enzyme catalytic polypeptide 3G; deoxycytidine deaminas…
APOBEC3H	APOBEC3H	apolipoprotein B mRNA editing enzyme catalytic subunit 3H	APOBEC-related protein 10; DNA dC->dU-editing enzyme APOBEC-3H; apolipoprotein B mRNA editing enzyme, catalytic polypeptide-like 3H
APOBEC4	APOBEC4	apolipoprotein B mRNA editing enzyme catalytic polypeptide like 4	apolipoprotein B mRNA editing enzyme, catalytic polypeptide-like 4 (putative); putative C->U-editing enzyme APOBEC-4
APOBR	APOBR	apolipoprotein B receptor	apoB-48R; apolipoprotein B receptor; apolipoprotein B-100 receptor; apolipoprotein B-48 receptor; apolipoprotein B100 receptor; apolipoprotein B48 receptor
APOC1	APOC1	apolipoprotein C1	apolipoprotein C-I
APOC2	APOC2 | APOC4-APOC2	apolipoprotein C2 | APOC4-APOC2 readthrough (NMD candidate)	apolipoprotein C-II | APOC4-APOC2 readthrough
APOC3	APOC3	apolipoprotein C3	apolipoprotein C-III
APOC4	APOC4 | APOC4-APOC2	apolipoprotein C4 | APOC4-APOC2 readthrough (NMD candidate)	apolipoprotein C-IV | APOC4-APOC2 readthrough
APOD	APOD	apolipoprotein D	apo-D; apolipoprotein D
APOE	APOE	apolipoprotein E	apolipoprotein E; apolipoprotein E3
APOF	APOF	apolipoprotein F	apolipoprotein F; lipid transfer inhibitor protein
APOH	APOH	apolipoprotein H	APC inhibitor; B2GPI; activated protein C-binding protein; anticardiolipin cofactor; apo-H; apolipoprotein H (beta-2-glycoprotein I); beta(2)GPI; beta-2-glycoprotein 1; epididymis secretory sperm binding protein
APOL1	APOL1	apolipoprotein L1	apolipoprotein L 1; apolipoprotein L1; apolipoprotein L1-B3
APOL2	APOL2	apolipoprotein L2	apolipoprotein L, 2; apolipoprotein L-II; apolipoprotein L2
APOL3	APOL3	apolipoprotein L3	TNF-inducible protein CG12-1; apolipoprotein L, 3; apolipoprotein L-III; apolipoprotein L3
APOL4	APOL4	apolipoprotein L4	apolipoprotein L, 4; apolipoprotein L-IV; apolipoprotein L4
APOL5	APOL5	apolipoprotein L5	apolipoprotein L, 5; apolipoprotein L-V; apolipoprotein L5
APOL6	APOL6	apolipoprotein L6	apolipoprotein L, 6; apolipoprotein L-VI; apolipoprotein L6
APOLD1	APOLD1	apolipoprotein L domain containing 1	apolipoprotein L domain-containing protein 1; vascular early response gene protein
APOM	APOM	apolipoprotein M	NG20-like protein; alternative name: G3a, NG20; apolipoprotein M; protein G3a
APOO	APOO	apolipoprotein O	MICOS complex subunit MIC23; MICOS complex subunit MIC26; brain my025; family with sequence similarity 121B; mitochondrial contact site and cristae organizing system subunit 26
APOOL	APOOL	apolipoprotein O like	AAIR8193; MICOS complex subunit MIC27; family with sequence similarity 121A; mitochondrial contact site and cristae organizing system subunit 27
APP	APP	amyloid beta precursor protein	alzheimer disease amyloid A4 protein homolog; alzheimer disease amyloid protein; amyloid beta (A4) precursor protein; amyloid beta A4 protein; amyloid precursor protein; amyloid-beta precursor protein; beta-amyloid peptide; beta-amyloid peptide(1-40); beta-amyloid peptide(1-42); beta-amyloid precursor protein; cerebral vascular amyloid peptide; peptidase nexin-II; protease nexin-II; testicular ti…
APPBP2	APPBP2	amyloid beta precursor protein binding protein 2	amyloid beta precursor protein (cytoplasmic tail) binding protein 2; amyloid protein-binding protein 2; protein interacting with APP tail 1
APPL1	APPL1	adaptor protein, phosphotyrosine interacting with PH domain and leucine zipper 1	AKT2 interactor; DCC-interacting protein 13-alpha; adapter protein containing PH domain, PTB domain and leucine zipper motif 1; adaptor protein containing pH domain, PTB domain and leucine zipper motif 1; adaptor protein, phosphotyrosine interaction, PH domain and leucine zipper containing 1; dip13-alpha; signaling adaptor protein DIP13alpha
APPL2	APPL2	adaptor protein, phosphotyrosine interacting with PH domain and leucine zipper 2	DCC-interacting protein 13-beta; DIP13 beta; adapter protein containing PH domain, PTB domain and leucine zipper motif 2; adaptor protein, phosphotyrosine interaction, PH domain and leucine zipper containing 2
APRT	APRT	adenine phosphoribosyltransferase	AMP diphosphorylase; AMP pyrophosphorylase; adenine phosphoribosyltransferase; transphosphoribosidase
APTX	APTX	aprataxin	aprataxin; forkhead-associated domain histidine triad-like protein
AQP1	AQP1	aquaporin 1 (Colton blood group)	Colton blood group antigen; aquaporin 1 (channel-forming integral protein, 28kDa, CO blood group); aquaporin 1, Colton blood group antigen; aquaporin-1; aquaporin-CHIP; bloodgroup CO protein; channel-like integral membrane protein of 28 kDa; channel-like integral membrane protein, 28-kDa; urine water channel; water channel protein for red blood cells and kidney proximal tubule
AQP10	AQP10	aquaporin 10	AQP-10; aquaglyceroporin-10; aquaporin-10; small intestine aquaporin
AQP11	AQP11	aquaporin 11	AQP-11; aquaporin-11
AQP12B	AQP12A | AQP12B	aquaporin 12A | aquaporin 12B	aquaporin 12; aquaporin X2; aquaporin-12A; putative aquaporin-12A | AQP-12B; aquaporin-12B; insulin synthesis associated 3; putative aquaporin-12B
AQP2	AQP2	aquaporin 2	ADH water channel; AQP-2; aquaporin 2 (collecting duct); aquaporin-2; aquaporin-CD; collecting duct water channel protein; water channel protein for renal collecting duct; water-channel aquaporin 2
AQP3	AQP3	aquaporin 3 (Gill blood group)	aquaglyceroporin-3; aquaporin 3 (GIL blood group); aquaporin-3
AQP4	AQP4	aquaporin 4	aquaporin type4; aquaporin-4; mercurial-insensitive water channel
AQP5	AQP5	aquaporin 5	aquaporin-5
AQP6	AQP6	aquaporin 6	AQP-6; aquaporin 2-like, kidney specific; aquaporin-6; aquaporin-6, kidney specific; hKID; kidney-specific aquaporin
AQP7	AQP7 | AQP7B | LOC112267859	aquaporin 7 | aquaporin 7B | putative aquaporin-7-like protein 3	aquaglyceroporin-7; aquaporin adipose; aquaporin-7 | aquaporin-7B; putative aquaporin-7B |
AQP7B	AQP7 | AQP7B | AQP7P1 | LOC112267859	aquaporin 7 | aquaporin 7B | | putative aquaporin-7-like protein 3	aquaglyceroporin-7; aquaporin adipose; aquaporin-7 | aquaporin-7B; putative aquaporin-7B | |
AQP8	AQP8	aquaporin 8	aquaporin-8
AQP9	AQP9	aquaporin 9	aquaglyceroporin-9; aquaporin-9; small solute channel 1
AQR	AQR	aquarius intron-binding spliceosomal factor	RNA helicase aquarius; aquarius homolog; functional spliceosome-associated protein 164; intron-binding protein aquarius; intron-binding protein of 160 kDa
AR	AR	androgen receptor	androgen receptor; dihydrotestosterone receptor; nuclear receptor subfamily 3 group C member 4
ARAF	ARAF	A-Raf proto-oncogene, serine/threonine kinase	A-Raf proto-oncogene serine/threonine-protein kinase; Oncogene ARAF1; Ras-binding protein DA-Raf; proto-oncogene A-Raf-1; proto-oncogene Pks; serine/threonine-protein kinase A-Raf; v-raf murine sarcoma 3611 viral oncogene homolog 1; v-raf murine sarcoma 3611 viral oncogene-like protein
ARAP1	ARAP1	ArfGAP with RhoGAP domain, ankyrin repeat and PH domain 1	ARF-GAP, RHO-GAP, ankyrin repeat, and pleckstrin homology domains-containing protein 1; arf-GAP with Rho-GAP domain, ANK repeat and PH domain-containing protein 1; centaurin-delta-2
ARAP2	ARAP2	ArfGAP with RhoGAP domain, ankyrin repeat and PH domain 2	Arf and Rho GAP adapter protein 2; arf-GAP with Rho-GAP domain, ANK repeat and PH domain-containing protein 2; centaurin-delta-1
ARAP3	ARAP3	ArfGAP with RhoGAP domain, ankyrin repeat and PH domain 3	ARF-GAP, RHO-GAP, ankyrin repeat and plekstrin homology domains-containing protein 3; Arf and Rho GAP adapter protein 3; PtdIns(3,4,5)P3-binding protein; arf-GAP with Rho-GAP domain, ANK repeat and PH domain-containing protein 3; centaurin-delta-3; phosphoinositide binding protein
ARB2A	ARB2A	ARB2 cotranscriptional regulator A	cotranscriptional regulator ARB2A; cotranscriptional regulator FAM172A; family with sequence similarity 172 member A; protein FAM172A
ARC	ARC	activity regulated cytoskeleton associated protein	ARC/ARG3.1; activity-regulated cytoskeleton-associated protein; activity-regulated gene 3.1 protein homolog
ARCN1	ARCN1	archain 1	COPI coat complex subunit delta; archain vesicle transport protein 1; coatomer delta subunit; coatomer protein complex, subunit delta; coatomer protein delta-COP; coatomer subunit delta; delta-COP; delta-coat protein
AREG	AREG	amphiregulin	amphiregulin; amphiregulin B; colorectum cell-derived growth factor; schwannoma-derived growth factor
AREL1	AREL1	apoptosis resistant E3 ubiquitin protein ligase 1	apoptosis-resistant E3 ubiquitin protein ligase 1; apoptosis-resistant HECT-type E3 ubiquitin transferase 1; fibrosis-inducing E3 ligase 1
ARF1	ARF1	ARF GTPase 1	ADP ribosylation factor 1; ADP-ribosylation factor 1
ARF3	ARF3	ARF GTPase 3	ADP ribosylation factor 3; ADP-ribosylation factor 3; small GTP binding protein
ARF4	ARF4	ARF GTPase 4	ADP ribosylation factor 4; ADP-ribosylation factor 2; ADP-ribosylation factor 4
ARF5	ARF5	ARF GTPase 5	ADP ribosylation factor 5; ADP-ribosylation factor 5
ARF6	ARF6	ARF GTPase 6	ADP ribosylation factor 6; ADP-ribosylation factor 6
ARFGAP1	ARFGAP1	ARF GTPase activating protein 1	ADP ribosylation factor GTPase activating protein 1; ADP-ribosylation factor GTPase-activating protein 1; ARF1-directed GTPase-activating protein
ARFGAP2	ARFGAP2	ARF GTPase activating protein 2	ADP ribosylation factor GTPase activating protein 2; ADP-ribosylation factor GTPase-activating protein 2; GTPase-activating protein ZNF289; zinc finger protein 289, ID1 regulated
ARFGAP3	ARFGAP3	ARF GTPase activating protein 3	ADP ribosylation factor GTPase activating protein 3; ADP-ribosylation factor GTPase activating protein 1; ADP-ribosylation factor GTPase-activating protein 3; ARF GAP 3
ARFGEF1	ARFGEF1	ARF guanine nucleotide exchange factor 1	ADP ribosylation factor guanine nucleotide exchange factor 1; ADP-ribosylation factor guanine nucleotide-exchange factor 1 (brefeldin A-inhibited); brefeldin A-inhibited guanine nucleotide-exchange protein 1; p200 ARF guanine nucleotide exchange factor
ARFGEF2	ARFGEF2	ARF guanine nucleotide exchange factor 2	ADP ribosylation factor guanine nucleotide exchange factor 2; ADP-ribosylation factor guanine nucleotide-exchange factor 2 (brefeldin A-inhibited); brefeldin A-inhibited GEP 2; brefeldin A-inhibited guanine nucleotide-exchange protein 2
ARFGEF3	ARFGEF3	ARFGEF family member 3	brefeldin A-inhibited guanine nucleotide-exchange protein 3; protein phosphatase 1, regulatory subunit 33
ARFIP1	ARFIP1	ARF interacting protein 1	ADP ribosylation factor interacting protein 1; arfaptin-1
ARFIP2	ARFIP2	ARF interacting protein 2	ADP ribosylation factor interacting protein 2; arfaptin-2; partner of RAC1 (arfaptin 2)
ARFRP1	ARFRP1	ARF related protein 1	ADP ribosylation factor related protein 1; ADP-ribosylation factor-related protein 1; SCG10 like-protein; epididymis secretory sperm binding protein; helicase-like protein NHL
ARG1	ARG1	arginase 1	arginase, liver; arginase-1; liver-type arginase; type I arginase
ARG2	ARG2	arginase 2	L-arginine amidinohydrolase; L-arginine ureahydrolase; arginase II; arginase, type II; arginase-2, mitochondrial; kidney arginase; kidney-type arginase; non-hepatic arginase; nonhepatic arginase; type II arginase
ARGFX	ARGFX	arginine-fifty homeobox	arginine-fifty homeobox
ARGLU1	ARGLU1	arginine and glutamate rich 1	arginine and glutamate-rich protein 1
ARHGAP1	ARHGAP1	Rho GTPase activating protein 1	CDC42 GTPase-activating protein; GTPase-activating protein rhoGAP; GTPase-activating protein rhoOGAP; GTPase-activating protein, Rho, 1; rho GTPase-activating protein 1; rho-related small GTPase protein activator; rho-type GTPase-activating protein 1
ARHGAP10	ARHGAP10	Rho GTPase activating protein 10	GTPase regulator associated with focal adhesion kinase 2; graf-related protein 2; rho GTPase-activating protein 10; rho-type GTPase-activating protein 10
ARHGAP11A	ARHGAP11A	Rho GTPase activating protein 11A	rho GTPase-activating protein 11A; rho-type GTPase-activating protein 11A
ARHGAP11B	ARHGAP11A | ARHGAP11A-SCG5 | ARHGAP11B	Rho GTPase activating protein 11A | ARHGAP11A-SCG5 readthrough | Rho GTPase activating protein 11B	rho GTPase-activating protein 11A; rho-type GTPase-activating protein 11A | ARHGAP11A-SCG5 protein | family with sequence similarity 7, member B1; inactive Rho GTPase-activating protein 11B; rho GTPase-activating protein 11B; rho-type GTPase-activating protein 11B
ARHGAP12	ARHGAP12	Rho GTPase activating protein 12	rho GTPase-activating protein 12; rho-type GTPase-activating protein 12
ARHGAP15	ARHGAP15	Rho GTPase activating protein 15	rho GTPase-activating protein 15; rho-type GTPase-activating protein 15
ARHGAP17	ARHGAP17	Rho GTPase activating protein 17	RhoGAP interacting with CIP4 homologs 1; neuron-associated developmentally regulated protein; rho GTPase-activating protein 17; rho-type GTPase-activating protein 17
ARHGAP18	ARHGAP18	Rho GTPase activating protein 18	rho GTPase-activating protein 18; rho-type GTPase-activating protein 18
ARHGAP19	ARHGAP19	Rho GTPase activating protein 19	putative RhoGAP protein; rho GTPase-activating protein 19; rho-type GTPase-activating protein 19
ARHGAP20	ARHGAP20	Rho GTPase activating protein 20	RA and RhoGAP domain containing protein; rho GTPase-activating protein 20; rho-type GTPase-activating protein 20
ARHGAP21	ARHGAP21	Rho GTPase activating protein 21	Rho-GTPase activating protein 10; rho GTPase-activating protein 10; rho GTPase-activating protein 21; rho-type GTPase-activating protein 21
ARHGAP22	ARHGAP22	Rho GTPase activating protein 22	rho GTPase-activating protein 22; rho-type GTPase-activating protein 22
ARHGAP23	ARHGAP23	Rho GTPase activating protein 23	rho GTPase-activating protein 23; rho-type GTPase-activating protein 23
ARHGAP24	ARHGAP24	Rho GTPase activating protein 24	RAC1- and CDC42-specific GTPase-activating protein of 72 kDa; filamin-A-associated RhoGAP; rho GTPase-activating protein 24; rhoGAP of 73 kDa; sarcoma antigen NY-SAR-88
ARHGAP25	ARHGAP25	Rho GTPase activating protein 25	epididymis secretory protein Li 308; epididymis secretory sperm binding protein; rho GTPase-activating protein 25; rho-type GTPase-activating protein 25
ARHGAP26	ARHGAP26	Rho GTPase activating protein 26	GTPase regulator associated with focal adhesion kinase pp125(FAK); oligophrenin-1-like protein; rho GTPase-activating protein 26
ARHGAP27	ARHGAP27	Rho GTPase activating protein 27	CIN85-associated multi-domain-containing Rho GTPase-activating protein 1; SH3 domain containing 20; SH3 domain-containing protein 20; rho GTPase-activating protein 27; rho-type GTPase-activating protein 27
ARHGAP28	ARHGAP28	Rho GTPase activating protein 28	rho GTPase-activating protein 28; rho-type GTPase-activating protein 28
ARHGAP29	ARHGAP29	Rho GTPase activating protein 29	PTPL1-associated RhoGAP 1 (PARG1); PTPL1-associated RhoGAP protein 1; rho GTPase-activating protein 29; rho-type GTPase-activating protein 29
ARHGAP30	ARHGAP30	Rho GTPase activating protein 30	rho GTPase-activating protein 30; rho-type GTPase-activating protein 30
ARHGAP31	ARHGAP31	Rho GTPase activating protein 31	Cdc42 GTPase-activating protein; rho GTPase-activating protein 31
ARHGAP32	ARHGAP32	Rho GTPase activating protein 32	GAB-associated CDC42; GAB-associated Cdc42/Rac GTPase-activating protein; GTPase regulator interacting with TrkA; GTPase-activating protein for Cdc42 and Rac1; RhoGAP involved in the -catenin-N-cadherin and NMDA receptor signaling; brain-specific Rho GTP-ase-activating protein; brain-specific Rho GTPase-activating protein; rac GTPase activating protein; rho GTPase-activating protein 32; rho-type …
ARHGAP33	ARHGAP33	Rho GTPase activating protein 33	neurite outgrowth multiadaptor RhoGAP protein; rho GTPase-activating protein 33; rho-type GTPase-activating protein 33; sorting nexin 26; tc10/CDC42 GTPase-activating protein
ARHGAP35	ARHGAP35	Rho GTPase activating protein 35	glucocorticoid receptor DNA-binding factor 1; glucocorticoid receptor repression factor 1; rho GAP p190A; rho GTPase-activating protein 35
ARHGAP36	ARHGAP36	Rho GTPase activating protein 36	rho GTPase-activating protein 36
ARHGAP39	ARHGAP39	Rho GTPase activating protein 39	RhoGAP93B homolog; crossGAP homolog; rho GTPase-activating protein 39
ARHGAP4	ARHGAP4	Rho GTPase activating protein 4	Rho-GAP hematopoietic protein C1; rho GTPase-activating protein 4; rho-type GTPase-activating protein 4
ARHGAP40	ARHGAP40	Rho GTPase activating protein 40	rho GTPase-activating protein 40; rho-type GTPase-activating protein 40
ARHGAP42	ARHGAP42	Rho GTPase activating protein 42	rho GTPase-activating protein 42; rho-type GTPase-activating protein 42; transmembrane protein 133
ARHGAP44	ARHGAP44	Rho GTPase activating protein 44	Rho-type GTPase-activating protein RICH2; RhoGAP interacting with CIP4 homologs protein 2; rho GTPase-activating protein 44; rho GTPase-activating protein RICH2
ARHGAP45	ARHGAP45	Rho GTPase activating protein 45	histocompatibility (minor) HA-1; minor histocompatibility antigen HA-1; minor histocompatibility protein HA-1; rho GTPase-activating protein 45
ARHGAP5	ARHGAP5	Rho GTPase activating protein 5	growth factor independent 2; p100 RasGAP-associated p105 protein; p105 RhoGAP; rho GTPase-activating protein 5; rho-type GTPase-activating protein 5
ARHGAP6	ARHGAP6	Rho GTPase activating protein 6	Rho-type GTPase-activating protein RhoGAPX-1; rho GTPase-activating protein 6; rho-type GTPase-activating protein 6
ARHGAP8	ARHGAP8 | PRR5-ARHGAP8	Rho GTPase activating protein 8 | PRR5-ARHGAP8 readthrough	BCH domain-containing Cdc42GAP-like protein; BNIP-2 and Cdc42GAP homology domain-containing, proline-rich and Cdc42GAP-like protein subtype-1; rho GTPase-activating protein 8; rho-type GTPase-activating protein 8 | PRR5-ARHGAP8 fusion; PRR5-ARHGAP8 fusion protein
ARHGAP9	ARHGAP9	Rho GTPase activating protein 9	rho GTPase-activating protein 9; rho-type GTPase-activating protein 9
ARHGDIA	ARHGDIA	Rho GDP dissociation inhibitor alpha	GDP-dissociation inhibitor, aplysia RAS-related 1; Rho GDP dissociation inhibitor (GDI) alpha; epididymis secretory sperm binding protein Li 47e; rho GDP-dissociation inhibitor 1
ARHGDIB	ARHGDIB	Rho GDP dissociation inhibitor beta	Rho GDI 2; Rho GDP dissociation inhibitor (GDI) beta; rho GDP-dissociation inhibitor 2; rho-GDI beta
ARHGDIG	ARHGDIG	Rho GDP dissociation inhibitor gamma	Rho GDP dissociation inhibitor (GDI) gamma; RhoGDI gamma; rho GDI 3; rho GDP-dissociation inhibitor 3; rho-GDI gamma
ARHGEF1	ARHGEF1	Rho guanine nucleotide exchange factor 1	115 kDa guanine nucleotide exchange factor; 115-kD protein; Lsc homolog; Rho guanine nucleotide exchange factor (GEF) 1; p115RhoGEF; rho guanine nucleotide exchange factor 1
ARHGEF10	ARHGEF10	Rho guanine nucleotide exchange factor 10	Rho guanine nucleotide exchange factor (GEF) 10; rho guanine nucleotide exchange factor 10
ARHGEF10L	ARHGEF10L	Rho guanine nucleotide exchange factor 10 like	Rho guanine nucleotide exchange factor (GEF) 10-like; rho guanine nucleotide exchange factor 10-like protein
ARHGEF11	ARHGEF11	Rho guanine nucleotide exchange factor 11	Rho guanine exchange factor (GEF) 11; Rho guanine nucleotide exchange factor (GEF) 11; RhoA-specific guanine nucleotide exchange factor; RhoGEF glutamate transport modulator; glutamate transporter EAAT4-associated protein 48; rho guanine nucleotide exchange factor 11
ARHGEF12	ARHGEF12	Rho guanine nucleotide exchange factor 12	KMT2A/ARHGEF12 fusion protein; Rho guanine nucleotide exchange factor (GEF) 12; leukemia-associated RhoGEF; leukemia-associated rho guanine nucleotide exchange factor; rho guanine nucleotide exchange factor 12
ARHGEF15	ARHGEF15	Rho guanine nucleotide exchange factor 15	Rho guanine nucleotide exchange factor (GEF) 15; ephexin-5; rho guanine nucleotide exchange factor 15
ARHGEF16	ARHGEF16	Rho guanine nucleotide exchange factor 16	Rho guanine exchange factor (GEF) 16; Rho guanine nucleotide exchange factor (GEF) 16; ephexin-4; ephexin4; rho guanine nucleotide exchange factor 16
ARHGEF17	ARHGEF17	Rho guanine nucleotide exchange factor 17	164 kDa Rho-specific guanine-nucleotide exchange factor; Rho guanine nucleotide exchange factor (GEF) 17; Rho-specific guanine-nucleotide exchange factor 164 kDa; rho guanine nucleotide exchange factor 17; tumor endothelial marker 4
ARHGEF18	ARHGEF18	Rho/Rac guanine nucleotide exchange factor 18	114 kDa Rho-specific guanine nucleotide exchange factor; Rho-specific guanine nucleotide exchange factor p114; Rho/Rac guanine nucleotide exchange factor (GEF) 18; rho guanine nucleotide exchange factor 18; septin-associated RhoGEF
ARHGEF19	ARHGEF19	Rho guanine nucleotide exchange factor 19	Rho guanine nucleotide exchange factor (GEF) 19; ephexin-2; ephexin2; rho guanine nucleotide exchange factor 19; weakly similar to Rho GEF
ARHGEF2	ARHGEF2	Rho/Rac guanine nucleotide exchange factor 2	Rho/Rac guanine nucleotide exchange factor (GEF) 2; guanine nucleotide exchange factor H1; microtubule-regulated Rho-GEF; proliferating cell nucleolar antigen p40; rho guanine nucleotide exchange factor 2
ARHGEF25	ARHGEF25	Rho guanine nucleotide exchange factor 25	RAC/CDC42 exchange factor; Rho guanine nucleotide exchange factor (GEF) 25; RhoA/RAC/CDC42 exchange factor; guanine nucleotide exchange factor GEFT; rac/Cdc42/Rho exchange factor GEFT; rho guanine nucleotide exchange factor 25; rhoA/Rac/Cdc42 guanine nucleotide exchange factor GEFT
ARHGEF26	ARHGEF26	Rho guanine nucleotide exchange factor 26	Rho guanine nucleotide exchange factor (GEF) 26; SH3 domain-containing guanine exchange factor; Src homology 3 domain-containing guanine nucleotide exchange factor; rho guanine nucleotide exchange factor 26; testicular tissue protein Li 171
ARHGEF28	ARHGEF28	Rho guanine nucleotide exchange factor 28	190 kDa guanine nucleotide exchange factor; Rho guanine nucleotide exchange factor (GEF) 28; Rho interacting protein 2; rho guanine nucleotide exchange factor 28; rho-guanine nucleotide exchange factor
ARHGEF3	ARHGEF3	Rho guanine nucleotide exchange factor 3	59.8 kDA protein; Rho guanine nucleotide exchange factor (GEF) 3; RhoGEF protein; exchange factor found in platelets and leukemic and neuronal tissues, XPLN; rho guanine nucleotide exchange factor 3
ARHGEF33	ARHGEF33	Rho guanine nucleotide exchange factor 33	DH and coiled-coil domain-containing protein ENSP00000381780; Rho guanine nucleotide exchange factor (GEF) 33; rho guanine nucleotide exchange factor 33
ARHGEF35	ARHGEF35	Rho guanine nucleotide exchange factor 35	Rho guanine nucleotide exchange factor (GEF) 35; rho guanine nucleotide exchange factor 35; rho guanine nucleotide exchange factor 5-like protein
ARHGEF37	ARHGEF37	Rho guanine nucleotide exchange factor 37	Rho guanine nucleotide exchange factor (GEF) 37; rho guanine nucleotide exchange factor 37
ARHGEF38	ARHGEF38	Rho guanine nucleotide exchange factor 38	Rho guanine nucleotide exchange factor (GEF) 38; rho guanine nucleotide exchange factor 38
ARHGEF39	ARHGEF39	Rho guanine nucleotide exchange factor 39	Rho guanine nucleotide exchange factor (GEF) 39; rho guanine nucleotide exchange factor 39; vav-like protein C9orf100
ARHGEF4	ARHGEF4 | SMIM39	Rho guanine nucleotide exchange factor 4 | small integral membrane protein 39	APC-stimulated guanine nucleotide exchange factor 1; Rho guanine nucleotide exchange factor (GEF) 4; rho guanine nucleotide exchange factor 4 | small integral membrane protein 39
ARHGEF40	ARHGEF40	Rho guanine nucleotide exchange factor 40	Rho guanine nucleotide exchange factor (GEF) 40; protein SOLO; rho guanine nucleotide exchange factor 40
ARHGEF5	ARHGEF5	Rho guanine nucleotide exchange factor 5	Rho guanine nucleotide exchange factor (GEF) 5; ephexin-3; ephexin3; guanine nucleotide regulatory protein TIM; oncogene TIM; p60 TIM; rho guanine nucleotide exchange factor 5; transforming immortalized mammary oncogene
ARHGEF6	ARHGEF6	Rac/Cdc42 guanine nucleotide exchange factor 6	PAK-interacting exchange factor, alpha; Rac/Cdc42 guanine exchange factor (GEF) 6; Rac/Cdc42 guanine nucleotide exchange factor (GEF) 6; rho guanine nucleotide exchange factor 6
ARHGEF7	ARHGEF7	Rho guanine nucleotide exchange factor 7	PAK-interacting exchange factor beta; Rho guanine nucleotide exchange factor (GEF) 7; SH3 domain-containing proline-rich protein; rho guanine nucleotide exchange factor 7
ARHGEF9	ARHGEF9	Cdc42 guanine nucleotide exchange factor 9	Cdc42 guanine nucleotide exchange factor (GEF) 9; PEM-2 homolog; hPEM-2 collybistin; rac/Cdc42 guanine nucleotide exchange factor 9; rho guanine nucleotide exchange factor 9
ARID1A	ARID1A	AT-rich interaction domain 1A	ARID domain-containing protein 1A; AT rich interactive domain 1A (SWI-like); AT-rich interactive domain-containing protein 1A; BRG1-associated factor 250a; OSA1 nuclear protein; SWI-like protein; SWI/SNF complex protein p270; SWI/SNF-related, matrix-associated, actin-dependent regulator of chromatin subfamily F member 1; brain protein 120; chromatin remodeling factor p250; osa homolog 1
ARID1B	ARID1B	AT-rich interaction domain 1B	ARID domain-containing protein 1B; AT rich interactive domain 1B (SWI1-like); AT-rich interactive domain-containing protein 1B; BRG1-associated factor 250b; BRG1-binding protein ELD/OSA1; ELD (eyelid)/OSA protein
ARID2	ARID2	AT-rich interaction domain 2	ARID domain-containing protein 2; AT rich interactive domain 2 (ARID, RFX-like); AT-rich interactive domain-containing protein 2; BRG1-associated factor 200; zinc finger protein with activation potential; zipzap/p200
ARID3A	ARID3A	AT-rich interaction domain 3A	ARID domain-containing 3A; ARID domain-containing protein 3A; AT rich interactive domain 3A (BRIGHT- like) protein; AT rich interactive domain 3A (BRIGHT-like); AT-rich interactive domain-containing protein 3A; B-cell regulator of IgH transcription; E2F-binding protein 1; dead ringer-like 1; dead ringer-like protein 1
ARID3B	ARID3B	AT-rich interaction domain 3B	ARID domain-containing protein 3B; AT rich interactive domain 3B (BRIGHT- like); AT-rich interactive domain-containing protein 3B; Bright-derived protein; bright and dead ringer protein; bright-like protein
ARID3C	ARID3C	AT-rich interaction domain 3C	ARID domain-containing protein 3C; AT rich interactive domain 3C (BRIGHT-like); AT-rich interactive domain-containing protein 3C; Brightlike
ARID4A	ARID4A	AT-rich interaction domain 4A	ARID domain-containing protein 4A; AT rich interactive domain 4A (RBP1-like); AT-rich interactive domain-containing protein 4A; retinoblastoma-binding protein 1
ARID4B	ARID4B	AT-rich interaction domain 4B	180 kDa Sin3-associated polypeptide; ARID domain-containing protein 4B; AT rich interactive domain 4B (RBP1-like); AT-rich interactive domain-containing protein 4B; Rb-binding protein homolog; SIN3A-associated protein 180; breast cancer-associated antigen 1; breast cancer-associated antigen BRCAA1; breast carcinoma-associated antigen; histone deacetylase complex subunit SAP180; retinoblastoma-bin…
ARID5A	ARID5A	AT-rich interaction domain 5A	ARID domain-containing protein 5A; AT rich interactive domain 5A (MRF1-like); AT-rich interactive domain-containing protein 5A; RFVG5814; modulator recognition factor 1; modulator recognition factor I
ARID5B	ARID5B	AT-rich interaction domain 5B	ARID domain-containing protein 5B; AT-rich interactive domain 5B (MRF1-like); AT-rich interactive domain-containing protein 5B; MRF1-like protein; modulator recognition factor 2 (MRF2)
ARIH1	ARIH1	ariadne RBR E3 ubiquitin protein ligase 1	ARI-1; E3 ubiquitin-protein ligase ARIH1; H7-AP2; MOP-6; ariadne homolog, ubiquitin-conjugating enzyme E2 binding protein, 1; ariadne, Drosophila, homolog of; monocyte protein 6; protein ariadne-1 homolog; ubcH7-binding protein; ubcM4-interacting protein; ubiquitin-conjugating enzyme E2-binding protein 1
ARIH2	ARIH2	ariadne RBR E3 ubiquitin protein ligase 2	E3 ubiquitin-protein ligase ARIH2; RING-type E3 ubiquitin transferase ARIH2; all-trans retinoic acid inducible RING finger; ariadne homolog 2; protein ariadne-2 homolog
ARK2C	ARK2C	arkadia (RNF111) C-terminal like ring finger ubiquitin ligase 2C	E3 ubiquitin-protein ligase ARK2C; E3 ubiquitin-protein ligase RNF165; lncRNA activated in metastatic PCa; ring finger protein 165
ARK2N	ARK2N	arkadia (RNF111) N-terminal like PKA signaling regulator 2N	ARKadia (RNF111) N-terminal like PKA signaling regulator protein 2N; ARKadia-like 1; ARKadia-like protein 1; protein ARK2N; protein C18orf25; uncharacterized protein C18orf25
ARL1	ARL1	ARF like GTPase 1	ADP ribosylation factor like GTPase 1; ADP-ribosylation factor-like 1; ADP-ribosylation factor-like protein 1
ARL10	ARL10	ARF like GTPase 10	ADP ribosylation factor like GTPase 10; ADP-ribosylation factor-like 10A; ADP-ribosylation factor-like membrane-associated protein; ADP-ribosylation factor-like protein 10
ARL11	ARL11	ARF like GTPase 11	ADP ribosylation factor like GTPase 11; ADP-ribosylation factor-like 11; ADP-ribosylation factor-like protein 11; ADP-ribosylation factor-like tumor suppressor gene 1; ADP-ribosylation factor-like tumor suppressor protein 1
ARL13A	ARL13A	ARF like GTPase 13A	ADP ribosylation factor like GTPase 13A; ADP-ribosylation factor-like 13; ADP-ribosylation factor-like 13A; ADP-ribosylation factor-like protein 13A
ARL13B	ARL13B	ARF like GTPase 13B	ADP ribosylation factor like GTPase 13B; ADP-ribosylation factor-like 13B; ADP-ribosylation factor-like 2-like 1; ADP-ribosylation factor-like protein 13B; ARL2-like protein 1
ARL14	ARL14	ARF like GTPase 14	ADP ribosylation factor like GTPase 14; ADP-ribosylation factor 7; ADP-ribosylation factor-like 14; ADP-ribosylation factor-like protein 14
ARL14EP	ARL14EP	ARF like GTPase 14 effector protein	ADP ribosylation factor like GTPase 14 effector protein; ADP-ribosylation factor-like 14 effector protein; ARF7 effector protein; ARL14 effector protein
ARL14EPL	ARL14EPL	ARF like GTPase 14 effector protein like	ADP ribosylation factor like GTPase 14 effector protein like; ADP-ribosylation factor-like 14 effector protein-like; ARL14 effector protein-like
ARL15	ARL15	ARF like GTPase 15	ADP ribosylation factor like GTPase 15; ADP-ribosylation factor-like 15; ADP-ribosylation factor-like protein 15; ADP-ribosylation factor-related protein 2; ARF-related protein 2
ARL16	ARL16	ARF like GTPase 16	ADP ribosylation factor like GTPase 16; ADP-ribosylation factor-like protein 16
ARL17A	ARL17A | ARL17B | LOC100996709 | LOC107984156	ARF like GTPase 17A | ARF like GTPase 17B | ADP-ribosylation factor-like protein 17 | ADP-ribosylation factor-like protein 17	ADP ribosylation factor like GTPase 17A; ADP-ribosylation factor 7; ADP-ribosylation factor-like 17-like | ADP ribosylation factor like GTPase 17B; ADP-ribosylation factor 7; ADP-ribosylation factor-like 17B; ADP-ribosylation factor-like protein 17 | ADP-ribosylation factor-like protein 17 | ADP-ribosylation factor-like protein 17
ARL2	ARL2	ARF like GTPase 2	ADP ribosylation factor like GTPase 2; ADP-ribosylation factor-like 2; ADP-ribosylation factor-like protein 2
ARL2BP	ARL2BP	ARF like GTPase 2 binding protein	ADP ribosylation factor like GTPase 2 binding protein; ADP-ribosylation factor like 2 binding protein; ADP-ribosylation factor-like protein 2-binding protein; ARF-like 2-binding protein; ARL2-binding protein; Arf-like 2 binding protein BART1; binder of ARF2 protein 1; binder of Arl Two; binder of Arl2; retinitis pigmentosa 66 (autosomal recessive)
ARL3	ARL3	ARF like GTPase 3	ADP ribosylation factor like GTPase 3; ADP-ribosylation factor-like 3; ADP-ribosylation factor-like protein 3; ARF-like 3
ARL4A	ARL4A	ARF like GTPase 4A	ADP ribosylation factor like GTPase 4A; ADP-ribosylation factor-like 4; ADP-ribosylation factor-like 4A; ADP-ribosylation factor-like protein 4A
ARL4C	ARL4C	ARF like GTPase 4C	ADP ribosylation factor like GTPase 4C; ADP ribosylation factor-like protein 7; ADP-ribosylation factor-like 4C; ADP-ribosylation factor-like 7; ADP-ribosylation factor-like protein 4C; ADP-ribosylation factor-like protein LAK
ARL4D	ARL4D	ARF like GTPase 4D	ADP ribosylation factor like GTPase 4D; ADP-ribosylation factor-like 4D; ADP-ribosylation factor-like protein 4D; ADP-ribosylation factor-like protein 4L
ARL5A	ARL5A	ARF like GTPase 5A	ADP ribosylation factor like GTPase 5A; ADP-ribosylation factor-like 5; ADP-ribosylation factor-like 5A; ADP-ribosylation factor-like protein 5; ADP-ribosylation factor-like protein 5A
ARL5B	ARL5B	ARF like GTPase 5B	ADP ribosylation factor like GTPase 5B; ADP-ribosylation factor-like 5B; ADP-ribosylation factor-like 8; ADP-ribosylation factor-like protein 5B; ADP-ribosylation factor-like protein 8; ADP-ribosylation-like factor 8
ARL5C	ARL5C	ARF like GTPase 5C	ADP ribosylation factor like GTPase 5C; ADP-ribosylation factor-like 5C; ADP-ribosylation factor-like protein 12; putative ADP-ribosylation factor-like protein 5C
ARL6	ARL6	ARF like GTPase 6	ADP ribosylation factor like GTPase 6; ADP-ribosylation factor-like protein 6; ARL6 interacting reticulophagy regulator 1; Bardet-Biedl syndrome 3 protein
ARL6IP1	ARL6IP1	ARL6 interacting reticulophagy regulator 1	ADP ribosylation factor like GTPase 6 interacting protein 1; ADP-ribosylation factor GTPase 6 interacting protein 1; ADP-ribosylation factor-like 6 interacting protein 1; ADP-ribosylation factor-like protein 6-interacting protein 1; ARF like GTPase 6 interacting protein 1; ARL-6-interacting protein 1; aip-1; apoptotic regulator in the membrane of the endoplasmic reticulum
ARL6IP4	ARL6IP4	ARF like GTPase 6 interacting protein 4	ADP ribosylation factor like GTPase 6 interacting protein 4; ADP-ribosylation factor GTPase 6 interacting protein 4; ADP-ribosylation factor-like 6 interacting protein 4; ADP-ribosylation factor-like protein 6-interacting protein 4; ADP-ribosylation-like factor 6 interacting protein 4; ARL-6-interacting protein 4; HSP-975; HSVI binding protein; SR-15; SRp25 nuclear protein; aip-4; splicing factor…
ARL6IP5	ARL6IP5	ARF like GTPase 6 interacting protein 5	ADP ribosylation factor like GTPase 6 interacting protein 5; ADP-ribosylation factor GTPase 6 interacting protein 5; ADP-ribosylation factor-like 6 interacting protein 5; ADP-ribosylation factor-like protein 6-interacting protein 5; ADP-ribosylation-like factor 6 interacting protein 5; ARL-6-interacting protein 5; JM5; PRA1 domain family 3; PRA1 family protein 3; aip-5; cytoskeleton-related vitam…
ARL6IP6	ARL6IP6	ARF like GTPase 6 interacting protein 6	ADP ribosylation factor like GTPase 6 interacting protein 6; ADP-ribosylation factor GTPase 6 interacting protein 6; ADP-ribosylation factor-like 6 interacting protein 6; ADP-ribosylation factor-like protein 6-interacting protein 6; ADP-ribosylation-like factor 6 interacting protein 6; ARL-6-interacting protein 6; phosphonoformate immuno-associated protein 1; regulated by phosphonoformate
ARL8A	ARL8A	ARF like GTPase 8A	ADP ribosylation factor like GTPase 8A; ADP-ribosylation factor-like 10B; ADP-ribosylation factor-like 8A; ADP-ribosylation factor-like protein 8A; GTPase indispensable for equal segregation of chromosomes 2; novel small G protein indispensable for equal chromosome segregation 2
ARL8B	ARL8B	ARF like GTPase 8B	ADP ribosylation factor like GTPase 8B; ADP-ribosylation factor-like 10C; ADP-ribosylation factor-like 8B; ADP-ribosylation factor-like protein 10C; ADP-ribosylation factor-like protein 8B; GTPase indispensable for equal segregation of chromosomes 1; novel small G protein indispensable for equal chromosome segregation 1
ARL9	ARL9	ARF like GTPase 9	ADP ribosylation factor like GTPase 9; ADP-ribosylation factor-like 9; ADP-ribosylation factor-like protein 9
ARMC1	ARMC1	armadillo repeat containing 1	armadillo repeat-containing protein 1
ARMC10	ARMC10	armadillo repeat containing 10	armadillo repeat-containing protein 10; specific splicing variant involved in hepatocarcinogenesis; splicing variant involved in hepatocarcinogenesis protein
ARMC12	ARMC12	armadillo repeat containing 12	armadillo repeat-containing protein 12
ARMC2	ARMC2	armadillo repeat containing 2	armadillo repeat-containing protein 2
ARMC3	ARMC3	armadillo repeat containing 3	armadillo repeat-containing protein 3; beta-catenin-like protein; cancer/testis antigen 81
ARMC5	ARMC5	armadillo repeat containing 5	armadillo repeat-containing protein 5
ARMC6	ARMC6	armadillo repeat containing 6	armadillo repeat-containing protein 6
ARMC7	ARMC7	armadillo repeat containing 7	armadillo repeat-containing protein 7
ARMC8	ARMC8	armadillo repeat containing 8	GID complex subunit 5, VID28 homolog; armadillo repeat-containing protein 8
ARMC9	ARMC9	armadillo repeat containing 9	armadillo repeat-containing protein 9; armadillo/beta-catenin-like repeats; lisH domain-containing protein ARMC9; melanoma/melanocyte specific protein KU-MEL-1; melanoma/melanocyte-specific tumor antigen KU-MEL-1
ARMCX1	ARMCX1	armadillo repeat containing X-linked 1	ARM protein lost in epithelial cancers on chromosome X 1; arm protein lost in epithelial cancers, X chromosome, 1; armadillo repeat-containing X-linked protein 1
ARMCX2	ARMCX2	armadillo repeat containing X-linked 2	ARM protein lost in epithelial cancers on chromosome X 2; armadillo repeat protein ALEX2; armadillo repeat-containing X-linked protein 2
ARMCX3	ARMCX3	armadillo repeat containing X-linked 3	ARM protein lost in epithelial cancers on chromosome X 3; arm protein lost in epithelial cancers, X chromosome, 3; armadillo repeat-containing X-linked protein 3
ARMCX4	ARMCX4	armadillo repeat containing X-linked 4	armadillo repeat containing, X-linked 4 pseudogene; armadillo repeat-containing X-linked protein 4
ARMCX5	ARMCX5	armadillo repeat containing X-linked 5	armadillo repeat-containing X-linked protein 5
ARMCX6	ARMCX6	armadillo repeat containing X-linked 6	protein ARMCX6
ARMH1	ARMH1	armadillo like helical domain containing 1	armadillo-like helical domain containing protein 1; uncharacterized protein C1orf228
ARMH2	ARMH2	armadillo like helical domain containing 2	armadillo-like helical domain-containing protein 2; uncharacterized protein C6orf229
ARMH3	ARMH3	armadillo like helical domain containing 3	UPF0668 protein C10orf76; armadillo-like helical domain-containing protein 3; distal Golgi armadillo repeat protein
ARMH4	ARMH4	armadillo like helical domain containing 4	armadillo-like helical domain-containing protein 4; uncharacterized protein C14orf37; upstream of mTORC2; upstream of mTORC2 protein
ARMS2	ARMS2	age-related maculopathy susceptibility 2	age-related maculopathy susceptibility protein 2
ARMT1	ARMT1	acidic residue methyltransferase 1	UPF0364 protein C6orf211; damage-control phosphatase ARMT1; protein-glutamate O-methyltransferase; sugar phosphate phosphatase ARMT1
ARNT	ARNT	aryl hydrocarbon receptor nuclear translocator	aryl hydrocarbon receptor nuclear translocator; class E basic helix-loop-helix protein 2; dioxin receptor, nuclear translocator; hypoxia inducible factor 1 subunit beta; hypoxia-inducible factor 1, beta subunit
ARNT2	ARNT2	aryl hydrocarbon receptor nuclear translocator 2	ARNT protein 2; aryl hydrocarbon receptor nuclear translocator 2; class E basic helix-loop-helix protein 1
ARPC1A	ARPC1A	actin related protein 2/3 complex subunit 1A	SOP2-like protein; actin binding protein (Schizosaccharomyces pombe sop2-like); actin related protein 2/3 complex, subunit 1A, 41kDa; actin-related protein 2/3 complex subunit 1A; epididymis luminal protein 68; epididymis secretory protein Li 307; epididymis secretory sperm binding protein
ARPC1B	ARPC1B	actin related protein 2/3 complex subunit 1B	ARP2/3 protein complex subunit p41; actin related protein 2/3 complex, subunit 1B, 41kDa; actin-related protein 2/3 complex subunit 1B; arp2/3 complex 41 kDa subunit
ARPC2	ARPC2	actin related protein 2/3 complex subunit 2	ARP2/3 protein complex subunit 34; actin related protein 2/3 complex, subunit 2, 34kDa; actin-related protein 2/3 complex subunit 2; arp2/3 complex 34 kDa subunit; testis tissue sperm-binding protein Li 53e
ARPC3	ARPC3	actin related protein 2/3 complex subunit 3	ARP2/3 protein complex subunit p21; actin related protein 2/3 complex, subunit 3, 21kDa; actin-related protein 2/3 complex subunit 3; arp2/3 complex 21 kDa subunit
ARPC4	ARPC4	actin related protein 2/3 complex subunit 4	actin related protein 2/3 complex, subunit 4, 20kDa; actin-related protein 2/3 complex subunit 4; arp2/3 complex 20 kDa subunit; arp2/3 protein complex subunit p20
ARPC5	ARPC5	actin related protein 2/3 complex subunit 5	Arp2/3 protein complex subunit p16; actin related protein 2/3 complex, subunit 5, 16kDa; actin-related protein 2/3 complex subunit 5; arp2/3 complex 16 kDa subunit
ARPC5L	ARPC5L	actin related protein 2/3 complex subunit 5 like	actin-related protein 2/3 complex subunit 5-like protein; arp2/3 complex 16 kDa subunit 2; epididymis secretory sperm binding protein
ARPIN	ARPIN	actin related protein 2/3 complex inhibitor	UPF0552 protein C15orf38; arp2/3 inhibition protein; arpin
ARPP19	ARPP19	cAMP regulated phosphoprotein 19	cAMP-regulated phosphoprotein 19; cAMP-regulated phosphoprotein 19kDa; cyclic AMP phosphoprotein, 19 kD
ARPP21	ARPP21	cAMP regulated phosphoprotein 21	R3H domain containing 3; cAMP regulated phosphoprotein 21kDa; cAMP-regulated phosphoprotein 21; cyclic AMP-regulated phosphoprotein, 21 kD; thymocyte cAMP-regulated phosphoprotein
ARR3	ARR3	arrestin 3	C-arrestin; arrestin 3 retinal (X-arrestin); arrestin 4; arrestin-C; retinal cone arrestin-3
ARRB1	ARRB1	arrestin beta 1	arrestin 2; beta-arrestin-1; non-visual arrestin-2
ARRB2	ARRB2	arrestin beta 2	arrestin 3; beta-arrestin-2; non-visual arrestin-3
ARRDC1	ARRDC1	arrestin domain containing 1	alpha-arrestin 1; arrestin domain-containing protein 1
ARRDC2	ARRDC2	arrestin domain containing 2	arrestin domain-containing protein 2
ARRDC3	ARRDC3	arrestin domain containing 3	TBP-2-like inducible membrane protein; alpha-arrestin 3; arrestin domain-containing protein 3
ARRDC4	ARRDC4	arrestin domain containing 4	arrestin domain-containing protein 4
ARRDC5	ARRDC5	arrestin domain containing 5	arrestin domain-containing protein 5
ARSA	ARSA	arylsulfatase A	arylsulfatase A; cerebroside-sulfatase; epididymis secretory sperm binding protein
ARSB	ARSB	arylsulfatase B	N-acetylgalactosamine-4-sulfatase; arylsulfatase B
ARSD	ARSD	arylsulfatase D	arylsulfatase D; testis tissue sperm-binding protein Li 39a
ARSF	ARSF	arylsulfatase F	arylsulfatase F
ARSG	ARSG	arylsulfatase G	ASG; N-sulfoglucosamine-3-sulfatase; arylsulfatase G
ARSH	ARSH	arylsulfatase family member H	ASH; arylsulfatase H
ARSI	ARSI	arylsulfatase family member I	arylsulfatase I
ARSJ	ARSJ	arylsulfatase family member J	arylsulfatase J
ARSK	ARSK	arylsulfatase family member K	ASK; arylsulfatase K; glucuronate-2-sulfatase; telethon sulfatase
ARSL	ARSL	arylsulfatase L	arylsulfatase E (chondrodysplasia punctata 1); arylsulfatase L
ART1	ART1	ADP-ribosyltransferase 1	ADP-ribosyltransferase 2; ADP-ribosyltransferase C2 and C3 toxin-like 1; GPI-linked NAD(P)(+)--arginine ADP-ribosyltransferase 1; mono(ADP-ribosyl)transferase 1
ART3	ART3	ADP-ribosyltransferase 3 (inactive)	ADP-ribosyltransferase C2 and C3 toxin-like 3; NAD(P)(+)--arginine ADP-ribosyltransferase 3; ecto-ADP-ribosyltransferase 3; mono(ADP-ribosyl)transferase 3; mono-ADP-ribosyltransferase
ART4	ART4	ADP-ribosyltransferase 4 (inactive) (Dombrock blood group)	ADP-ribosyltransferase 4 (DO blood group); ADP-ribosyltransferase 4 (Dombrock blood group); ADP-ribosyltransferase C2 and C3 toxin-like 4; Do glycoprotein; Dombrock blood group carrier molecule; Dombrock glycoprotein; NAD(+)--protein-arginine ADP-ribosyltransferase 4; NAD(P)(+)--arginine ADP-ribosyltransferase 4; ecto-ADP-ribosyltransferase 4; mono-ADP-ribosyltransferase 4
ART5	ART5	ADP-ribosyltransferase 5	ADP-ribosyltransferase C2 and C3 toxin-like 5; NAD(P)(+)--arginine ADP-ribosyltransferase 5; ecto-ADP-ribosyltransferase 5; mono(ADP-ribosyl)transferase 5
ARTN	ARTN	artemin	artemin; neublastin
ARV1	ARV1	ARV1 homolog, fatty acid homeostasis modulator	protein ARV1
ARVCF	ARVCF	ARVCF delta catenin family member	armadillo repeat gene deleted in velocardiofacial syndrome; armadillo repeat protein deleted in velo-cardio-facial syndrome; splicing regulator ARVCF
ARX	ARX	aristaless related homeobox	aristaless-related homeobox, X-linked; cancer/testis antigen 121; homeobox protein ARX
AS3MT	AS3MT | BORCS7-ASMT	arsenite methyltransferase |	S-adenosyl-L-methionine:arsenic(III) methyltransferase; S-adenosylmethionine:arsenic (III) methyltransferase; arsenic (+3 oxidation state) methyltransferase; arsenite methyltransferase; methylarsonite methyltransferase; methyltransferase cyt19 |
ASAH1	ASAH1	N-acylsphingosine amidohydrolase 1	N-acylethanolamine hydrolase ASAH1; N-acylsphingosine amidohydrolase (acid ceramidase) 1; acid CDase; acid ceramidase; acylsphingosine deacylase; glycosylceramide deacylase; putative 32 kDa heart protein
ASAH2	ASAH2	N-acylsphingosine amidohydrolase 2	N-acylsphingosine amidohydrolase (non-lysosomal ceramidase) 2; acylsphingosine deacylase 2; mitochondrial ceramidase; neutral ceramidase; neutral/alkaline ceramidase; non-lysosomal ceramidase
ASAH2B	ASAH2B	N-acylsphingosine amidohydrolase 2B	ASAH2-like protein; N-acylsphingosine amidohydrolase (non-lysosomal ceramidase) 2B; putative inactive N-acylsphingosine amidohydrolase 2B; putative inactive neutral ceramidase B; putative inactive non-lysosomal ceramidase B
ASAP1	ASAP1	ArfGAP with SH3 domain, ankyrin repeat and PH domain 1	130 kDa phosphatidylinositol 4,5-biphosphate-dependent ARF1 GTPase-activating protein; 130 kDa phosphatidylinositol 4,5-bisphosphate-dependent ARF1 GTPase-activating protein; ADP-ribosylation factor-directed GTPase-activating protein 1; ARF GTPase-activating protein 1; DEF-1; PIP2-dependent ARF1 GAP; arf-GAP with SH3 domain, ANK repeat and PH domain-containing protein 1; centaurin, beta 4; develo…
ASAP2	ASAP2	ArfGAP with SH3 domain, ankyrin repeat and PH domain 2	PYK2 C terminus-associated protein; arf-GAP with SH3 domain, ANK repeat and PH domain-containing protein 2; centaurin, beta 3; development and differentiation-enhancing factor 2; paxillin-associated protein with ARF GAP activity 3; pyk2 C-terminus-associated protein
ASAP3	ASAP3	ArfGAP with SH3 domain, ankyrin repeat and PH domain 3	ARF6 GTPase-activating protein; ArfGAP with SH3 domain, ankyrin repeat and PH domain 3 1; arf-GAP with SH3 domain, ANK repeat and PH domain-containing protein 3; centaurin, beta 6; development and differentiation enhancing factor-like 1; protein up-regulated in liver cancer 1; up-regulated in liver cancer 1 (UPLC1)
ASB1	ASB1	ankyrin repeat and SOCS box containing 1	ankyrin repeat and SOCS box protein 1
ASB10	ASB10	ankyrin repeat and SOCS box containing 10	ankyrin repeat and SOCS box protein 10
ASB11	ASB11	ankyrin repeat and SOCS box containing 11	ASB-11; ankyrin repeat and SOCS box containing 11, E3 ubiquitin protein ligase; ankyrin repeat and SOCS box protein 11; ankyrin repeat domain-containing SOCS box protein ASB11
ASB12	ASB12	ankyrin repeat and SOCS box containing 12	ankyrin repeat and SOCS box protein 12; ankyrin repeat domain-containing SOCS box protein Asb-12
ASB13	ASB13	ankyrin repeat and SOCS box containing 13	ankyrin repeat and SOCS box protein 13; ankyrin repeat domain-containing SOCS box protein Asb-13
ASB14	ASB14	ankyrin repeat and SOCS box containing 14	ankyrin repeat and SOCS box protein 14; ankyrin repeat domain-containing SOCS box protein Asb-14
ASB15	ASB15	ankyrin repeat and SOCS box containing 15	ankyrin repeat and SOCS box protein 15; epididymis secretory sperm binding protein
ASB16	ASB16	ankyrin repeat and SOCS box containing 16	ankyrin repeat and SOCS box protein 16; ankyrin repeat and SOCS box-containing protein 16
ASB17	ASB17	ankyrin repeat and SOCS box containing 17	ankyrin repeat and SOCS box protein 17
ASB18	ASB18	ankyrin repeat and SOCS box containing 18	ankyrin repeat and SOCS box protein 18
ASB2	ASB2	ankyrin repeat and SOCS box containing 2	ankyrin repeat and SOCS box protein 2; ankyrin repeat and SOCS box-containing protein 2a
ASB3	ASB3	ankyrin repeat and SOCS box containing 3	ankyrin repeat and SOCS box protein 3
ASB4	ASB4	ankyrin repeat and SOCS box containing 4	ankyrin repeat and SOCS box protein 4
ASB5	ASB5	ankyrin repeat and SOCS box containing 5	SOCS box protein ASB-5; ankyrin repeat and SOCS box protein 5
ASB6	ASB6	ankyrin repeat and SOCS box containing 6	ankyrin repeat and SOCS box protein 6
ASB7	ASB7	ankyrin repeat and SOCS box containing 7	ASB-7; ankyrin repeat and SOCS box protein 7
ASB8	ASB8	ankyrin repeat and SOCS box containing 8	ankyrin repeat and SOCS box protein 8
ASB9	ASB9	ankyrin repeat and SOCS box containing 9	ASB-9; ankyrin repeat and SOCS box protein 9; ankyrin repeat and suppressor of cytokine signaling box protein 9; testis tissue sperm-binding protein Li 57p
ASCC1	ASCC1	activating signal cointegrator 1 complex subunit 1	ASC-1 complex subunit P50; activating signal cointegrator 1 complex subunit 1; trip4 complex subunit p50
ASCC2	ASCC2	activating signal cointegrator 1 complex subunit 2	ASC-1 complex subunit P100; activating signal cointegrator 1 complex subunit 2; trip4 complex subunit p100
ASCC3	ASCC3	activating signal cointegrator 1 complex subunit 3	ASC-1 complex subunit P200; RNA helicase family; activating signal cointegrator 1 complex subunit 3; helicase, ATP binding 1; trip4 complex subunit p200
ASCL1	ASCL1	achaete-scute family bHLH transcription factor 1	ASH-1; achaete scute protein; achaete-scute complex homolog 1; achaete-scute complex-like 1; achaete-scute homolog 1; class A basic helix-loop-helix protein 46
ASCL2	ASCL2	achaete-scute family bHLH transcription factor 2	achaete-scute complex homolog 2; achaete-scute complex-like 2; achaete-scute homolog 2; class A basic helix-loop-helix protein 45; mammalian achaete/scute homologue 2
ASCL3	ASCL3	achaete-scute family bHLH transcription factor 3	achaete-scute complex homolog 3; achaete-scute homolog 3; bHLH transcription factor Sgn-1 (Salivary Glands 1); bHLH transcriptional regulator Sgn-1; class A basic helix-loop-helix protein 42
ASCL4	ASCL4	achaete-scute family bHLH transcription factor 4	achaete-scute complex homolog 4; achaete-scute complex-like 4; achaete-scute homolog 4; achaete-scute-like protein 4; class A basic helix-loop-helix protein 44; class II bHLH protein ASCL4
ASCL5	ASCL5	achaete-scute family bHLH transcription factor 5	achaete-scute complex homolog 5; achaete-scute homolog 5; class A basic helix-loop-helix protein 47
ASDURF	ASDURF | ASNSD1	ASNSD1 upstream open reading frame | asparagine synthetase domain containing 1	ASNSD1 upstream open reading frame protein; ASNSD1 upstream reading frame; Asparagine synthetase domain-containing protein 1; HCV NS3-transactivated protein 1; alternative protein ASNSD1 | HCV NS3-transactivated protein 1; asparagine synthetase domain-containing protein 1
ASF1A	ASF1A	anti-silencing function 1A histone chaperone	ASF1 anti-silencing function 1 homolog A; CCG1-interacting factor A; anti-silencing function protein 1 homolog A; hAsf1; hAsf1a; hCIA; histone chaperone ASF1A
ASF1B	ASF1B	anti-silencing function 1B histone chaperone	ASF1 anti-silencing function 1 homolog B; CCG1-interacting factor A-II; anti-silencing function protein 1 homolog B; hAsf1; hAsf1b; hCIA-II; histone chaperone ASF1B
ASGR1	ASGR1	asialoglycoprotein receptor 1	C-type lectin domain family 4 member H1; asialoglycoprotein receptor 1; hepatic lectin H1
ASGR2	ASGR2	asialoglycoprotein receptor 2	C-type lectin domain family 4 member H2; HBxAg-binding protein; asialoglycoprotein receptor 2; hepatic lectin H2
ASH1L	ASH1L	ASH1 like histone lysine methyltransferase	ASH1-like protein; absent small and homeotic disks protein 1 homolog; ash1 (absent, small, or homeotic)-like; histone-lysine N-methyltransferase ASH1L; lysine N-methyltransferase 2H; probable histone-lysine N-methyltransferase ASH1L
ASH2L	ASH2L	ASH2 like, histone lysine methyltransferase complex subunit	ASH2-like protein; ash2 (absent, small, or homeotic)-like; set1/Ash2 histone methyltransferase complex subunit ASH2
ASIC1	ASIC1	acid sensing ion channel subunit 1	Cation channel, amiloride-sensitive, neuronal, 2; acid sensing (proton gated) ion channel 1; acid-sensing ion channel 1; acid-sensing ion channel 1a protein; amiloride-sensitive cation channel 2, neuronal; brain sodium channel 2
ASIC2	ASIC2	acid sensing ion channel subunit 2	acid sensing (proton gated) ion channel 2; acid-sensing ion channel 2; amiloride-sensitive cation channel 1, neuronal; brain Na+ channel-1; brain sodium channel 1; mammalian degenerin homolog; neuronal amiloride-sensitive cation channel 1
ASIC3	ASIC3	acid sensing ion channel subunit 3	acid sensing (proton gated) ion channel 3; acid-sensing ion channel 3; amiloride-sensitive cation channel 3, testis; modulatory subunit of ASIC2a; neuronal amiloride-sensitive cation channel 3; proton-gated cation channel subunit; testis sodium channel 1
ASIC4	ASIC4	acid sensing ion channel subunit family member 4	acid sensing ion channel family member 4; acid-sensing (proton-gated) ion channel family member 4; acid-sensing ion channel 4; amiloride-sensitive cation channel 4, pituitary; amiloride-sensitive cation channel family member 4, pituitary; brain sodium channel 4
ASIC5	ASIC5	acid sensing ion channel subunit family member 5	acid sensing (proton gated) ion channel family member 5; acid sensing ion channel family member 5; acid-sensing ion channel 5; amiloride-sensitive cation channel 5, intestinal; amiloride-sensitive sodium channel; human intestine Na(+) channel
ASIP	ASIP	agouti signaling protein	agouti signaling protein, nonagouti homolog; agouti switch protein; agouti-signaling protein; nonagouti homolog
ASL	ASL	argininosuccinate lyase	argininosuccinase; argininosuccinate lyase; arginosuccinase
ASMT	ASMT	acetylserotonin O-methyltransferase	acetylserotonin N-methyltransferase; acetylserotonin O-methyltransferase; acetylserotonin methyltransferase (Y chromosome); hydroxyindole O-methyltransferase
ASMTL	ASMTL	acetylserotonin O-methyltransferase like	N-acetylserotonin O-methyltransferase-like protein; acetylserotonin N-methyltransferase-like; probable bifunctional dTTP/UTP pyrophosphatase/methyltransferase protein
ASNS	ASNS | CZ1P-ASNS	asparagine synthetase (glutamine-hydrolyzing) | CZ1P-ASNS readthrough	TS11 cell cycle control protein; asparagine synthetase [glutamine-hydrolyzing]; glutamine-dependent asparagine synthetase |
ASNSD1	ASNSD1	asparagine synthetase domain containing 1	HCV NS3-transactivated protein 1; asparagine synthetase domain-containing protein 1
ASPA	ASPA	aspartoacylase	ACY-2; aminoacylase 2; aspartoacylase; cytosolic aspartoacylase
ASPDH	ASPDH	aspartate dehydrogenase domain containing	aspartate dehydrogenase domain-containing protein; putative L-aspartate dehydrogenase
ASPG	ASPG	asparaginase	60 kDa lysophospholipase; PAF acetylhydrolase; asparaginase homolog; lysophospholipase-transacylase; wild-type L-asparaginase
ASPH	ASPH	aspartate beta-hydroxylase	A beta H-J-J; ASP beta-hydroxylase; aspartyl/asparaginyl beta-hydroxylase; cardiac junctin; humbug; junctate; peptide-aspartate beta-dioxygenase
ASPHD1	ASPHD1	aspartate beta-hydroxylase domain containing 1	aspartate beta-hydroxylase domain-containing protein 1
ASPHD2	ASPHD2	aspartate beta-hydroxylase domain containing 2	aspartate beta-hydroxylase domain-containing protein 2
ASPM	ASPM	assembly factor for spindle microtubules	abnormal spindle microtubule assembly; abnormal spindle-like microcephaly-associated protein; asp (abnormal spindle) homolog, microcephaly associated
ASPN	ASPN	asporin	asporin; asporin (LRR class 1); asporin proteoglycan; periodontal ligament associated protein 1; small leucine-rich protein 1C
ASPRV1	ASPRV1	aspartic peptidase retroviral like 1	TPA-inducible aspartic proteinase-like protein; retroviral-like aspartic protease 1; skin aspartic protease; skin-specific retroviral-like aspartic protease
ASPSCR1	ASPSCR1	ASPSCR1 tether for SLC2A4, UBX domain containing	ASPSCR1, UBX domain containing tether for SLC2A4; UBX domain protein 9; UBX domain-containing protein 9; alveolar soft part sarcoma chromosomal region candidate gene 1 protein; alveolar soft part sarcoma chromosome region, candidate 1; alveolar soft part sarcoma locus; renal cell carcinoma gene on chromosome 17; renal cell carcinoma, papillary, 17; renal papillary cell carcinoma protein 17; tethe…
ASRGL1	ASRGL1	asparaginase and isoaspartyl peptidase 1	L-asparaginase; L-asparagine amidohydrolase; asparaginase like 1; asparaginase-like 1 protein; asparaginase-like protein 1; beta-aspartyl-peptidase; isoaspartyl dipeptidase; isoaspartyl peptidase/L-asparaginase; testis secretory sperm-binding protein Li 242mP
ASS1	ASS1	argininosuccinate synthase 1	argininosuccinate synthase; argininosuccinate synthetase 1; citrulline-aspartate ligase; epididymis secretory sperm binding protein
ASTE1	ASTE1	asteroid homolog 1	protein asteroid homolog 1; single-strand DNA endonuclease ASTE1
ASTL	ASTL	astacin like metalloendopeptidase	ZP2-proteinase; astacin-like metallo-endopeptidase (M12 family); astacin-like metalloendopeptidase; astacin-like metalloendopeptidase (M12 family); oocyte astacin; ovastacin; sperm acrosomal SLLP1 binding
ASTN1	ASTN1	astrotactin 1	astrotactin-1
ASTN2	ASTN2	astrotactin 2	astrotactin-2
ASXL1	ASXL1	ASXL transcriptional regulator 1	additional sex combs like 1, transcriptional regulator; additional sex combs like transcriptional regulator 1; polycomb group protein ASXL1; putative Polycomb group protein ASXL1
ASXL2	ASXL2	ASXL transcriptional regulator 2	additional sex combs like 2, transcriptional regulator; additional sex combs-like protein 2; polycomb group protein ASXH2; putative Polycomb group protein ASXL2
ASXL3	ASXL3	ASXL transcriptional regulator 3	additional sex combs like 3, transcriptional regulator; additional sex combs like transcriptional regulator 3; additional sex combs-like protein 3; putative Polycomb group protein ASXL3
ASZ1	ASZ1	ankyrin repeat, SAM and basic leucine zipper domain containing 1	ankyrin repeat, SAM and basic leucine zipper domain-containing protein 1; ankyrin-like 1; ankyrin-like protein 1; germ cell-specific ankyrin, SAM and basic leucine zipper domain-containing protein
ATAD1	ATAD1	ATPase family AAA domain containing 1	ATPase family AAA domain-containing protein 1; outer mitochondrial transmembrane helix translocase
ATAD2	ATAD2	ATPase family AAA domain containing 2	AAA nuclear coregulator cancer-associated protein; ATPase family AAA domain-containing protein 2
ATAD2B	ATAD2B	ATPase family AAA domain containing 2B	ATPase family AAA domain-containing protein 2B
ATAD3A	ATAD3A	ATPase family AAA domain containing 3A	ATPase family AAA domain-containing protein 3A
ATAD3B	ATAD3B	ATPase family AAA domain containing 3B	AAA-ATPase TOB3; ATPase family AAA domain-containing protein 3B
ATAD3C	ATAD3C	ATPase family AAA domain containing 3C	ATPase family AAA domain-containing protein 3C; ATPase family, AAA domain containing 3A
ATAD5	ATAD5	ATPase family AAA domain containing 5	ATPase family AAA domain-containing protein 5; chromosome fragility associated gene 1; chromosome fragility-associated gene 1 protein; enhanced level of genomic instability 1 homolog
ATAT1	ATAT1	alpha tubulin acetyltransferase 1	acetyltransferase mec-17 homolog; alpha-tubulin N-acetyltransferase 1
ATCAY	ATCAY	ATCAY kinesin light chain interacting caytaxin	ATCAY, caytaxin; BNIP-2-homolgy; BNIP-2-homology; Cayman ataxia; ataxia cayman type protein; ataxia cerebellar Cayman type; caytaxin
ATE1	ATE1	arginyltransferase 1	R-transferase 1; arginine-tRNA--protein transferase 1; arginyl-tRNA--protein transferase 1; arginyl-tRNA-protein transferase
ATF1	ATF1	activating transcription factor 1	cAMP-dependent transcription factor ATF-1; cyclic AMP-dependent transcription factor ATF-1
ATF2	ATF2	activating transcription factor 2	cAMP response element-binding protein CRE-BP1; cAMP responsive element binding protein 2, formerly; cAMP-dependent transcription factor ATF-2; cyclic AMP-dependent transcription factor ATF-2; cyclic AMP-responsive element-binding protein 2; histone acetyltransferase ATF2
ATF3	ATF3	activating transcription factor 3	cAMP-dependent transcription factor ATF-3; cyclic AMP-dependent transcription factor ATF-3
ATF4	ATF4	activating transcription factor 4	DNA-binding protein TAXREB67; cAMP response element-binding protein 2; cAMP-dependent transcription factor ATF-4; cAMP-responsive element-binding protein 2; cyclic AMP-dependent transcription factor ATF-4; cyclic AMP-responsive element-binding protein 2; tax-responsive enhancer element B67; tax-responsive enhancer element-binding protein 67
ATF5	ATF5	activating transcription factor 5	cAMP-dependent transcription factor ATF-5; cyclic AMP-dependent transcription factor ATF-5; transcription factor ATFx
ATF6	ATF6	activating transcription factor 6	cAMP-dependent transcription factor ATF-6 alpha; cyclic AMP-dependent transcription factor ATF-6 alpha
ATF6B	ATF6B	activating transcription factor 6 beta	Creb-related protein; cAMP response element-binding protein-related protein; cAMP-dependent transcription factor ATF-6 beta; cAMP-responsive element-binding protein-like 1; cyclic AMP-dependent transcription factor ATF-6 beta; protein G13
ATF7	ATF7 | ATF7-NPFF	activating transcription factor 7 | ATF7-NPFF readthrough	cyclic AMP-dependent transcription factor ATF-7; transcription factor ATF-A | ATF7-NPFF readthrough protein
ATF7IP	ATF7IP	activating transcription factor 7 interacting protein	ATF-interacting protein; ATF7-interacting protein; ATFa-associated modulator; MBD1-containing chromatin-associated factor 1; activating transcription factor 7-interacting protein 1
ATF7IP2	ATF7IP2	activating transcription factor 7 interacting protein 2	ATF7-interacting protein 2; MBD1-containing chromatin associated factor 2; activating transcription factor 7-interacting protein 2
ATG10	ATG10	autophagy related 10	APG10 autophagy 10-like; ATG10 autophagy related 10 homolog; autophagy-related protein 10; ubiquitin-like-conjugating enzyme ATG10
ATG101	ATG101	autophagy related 101	Atg13-interacting protein; autophagy-related protein 101
ATG12	ATG12	autophagy related 12	APG12 autophagy 12-like; ATG12 autophagy related 12 homolog; Apg12 (autophagy, yeast) homolog; ubiquitin-like protein ATG12
ATG13	ATG13	autophagy related 13	ATG13 autophagy related 13 homolog; autophagy-related protein 13
ATG14	ATG14	autophagy related 14	ATG14 autophagy related 14 homolog; Beclin 1-Interacting protein; autophagy-related protein 14-like protein; beclin 1-associated autophagy-related key regulator
ATG16L1	ATG16L1	autophagy related 16 like 1	APG16L beta; ATG16 autophagy related 16-like 1; WD repeat domain 30; autophagy-related protein 16-1
ATG16L2	ATG16L2	autophagy related 16 like 2	APG16-like 2; ATG16 autophagy related 16-like 2; WD repeat-containing protein 80; autophagy-related protein 16-2; protein Atg16l2
ATG2A	ATG2A	autophagy related 2A	ATG2 autophagy related 2 homolog A; autophagy-related protein 2 homolog A; bridge-like lipid transfer protein family member 4A
ATG2B	ATG2B	autophagy related 2B	ATG2 autophagy related 2 homolog B; autophagy-related protein 2 homolog B; bridge-like lipid transfer protein family member 4B
ATG3	ATG3	autophagy related 3	APG3 autophagy 3-like; ATG3 autophagy related 3 homolog; autophagy-related protein 3; ubiquitin-like-conjugating enzyme ATG3
ATG4A	ATG4A	autophagy related 4A cysteine peptidase	APG4 autophagy 4 homolog A; ATG4 autophagy related 4 homolog A; AUT-like 2, cysteine endopeptidase; autophagin 2; autophagy-related cysteine endopeptidase 2; autophagy-related protein 4 homolog A; cysteine protease ATG4A; hAPG4A
ATG4B	ATG4B	autophagy related 4B cysteine peptidase	APG4 autophagy 4 homolog B; ATG4 autophagy related 4 homolog B; AUT-like 1 cysteine endopeptidase; autophagin-1; autophagy-related cysteine endopeptidase 1; autophagy-related protein 4 homolog B; cysteine protease ATG4B; hAPG4B
ATG4C	ATG4C	autophagy related 4C cysteine peptidase	APG4 autophagy 4 homolog C; ATG4 autophagy related 4 homolog C; AUT-like 1, cysteine endopeptidase; AUT-like 3 cysteine endopeptidase; autophagin-3; autophagy-related cysteine endopeptidase 3; autophagy-related protein 4 homolog C; cysteine protease ATG4C; epididymis secretory sperm binding protein
ATG4D	ATG4D	autophagy related 4D cysteine peptidase	APG4 autophagy 4 homolog D; ATG4 autophagy related 4 homolog D; AUT-like 4 cysteine endopeptidase; autophagin-4; autophagy-related cysteine endopeptidase 4; autophagy-related protein 4 homolog D; cysteine protease ATG4D; cysteine protease involved in autophagy
ATG5	ATG5	autophagy related 5	APG5 autophagy 5-like; ATG5 autophagy related 5 homolog; apoptosis-specific protein; autophagy protein 5
ATG7	ATG7	autophagy related 7	APG7 autophagy 7-like; ATG12-activating enzyme E1 ATG7; hAGP7; ubiquitin-activating enzyme E1-like protein; ubiquitin-like modifier-activating enzyme ATG7
ATG9A	ATG9A	autophagy related 9A	APG9 autophagy 9-like 1; APG9-like 1; ATG9 autophagy related 9 homolog A; autophagy 9-like 1 protein; autophagy-related protein 9A
ATG9B	ATG9B	autophagy related 9B	APG9-like 2; ATG9 autophagy related 9 homolog B; autophagy 9-like 2 protein; autophagy-related protein 9B; endothelial nitric oxide synthase antisense; nitric oxide synthase 3-overlapping antisense gene protein
ATIC	ATIC	5-aminoimidazole-4-carboxamide ribonucleotide formyltransferase/IMP cyclohydrolase	5-aminoimidazole-4-carboxamide-1-beta-D-ribonucleotide transformylase/inosinicase; AICAR formyltransferase/IMP cyclohydrolase bifunctional enzyme; AICAR transformylase/inosine monophosphate cyclohydrolase; AICARFT/IMPCHASE; bifunctional purine biosynthesis protein ATIC; bifunctional purine biosynthesis protein PURH; epididymis secretory sperm binding protein Li 70p; phosphoribosylaminoimidazoleca…
ATL1	ATL1	atlastin GTPase 1	GBP-3; GTP-binding protein 3; atlastin-1; brain-specific GTP-binding protein; guanine nucleotide-binding protein 3; guanylate-binding protein 3; hGBP3; spastic paraplegia 3 protein A
ATL2	ATL2	atlastin GTPase 2	ADP-ribosylation factor-like protein 6-interacting protein 2; ARL-6-interacting protein 2; atlastin-2
ATL3	ATL3	atlastin GTPase 3	atlastin-3
ATM	ATM	ATM serine/threonine kinase	A-T mutated; AT mutated; TEL1, telomere maintenance 1, homolog; ataxia telangiectasia mutated; serine-protein kinase ATM; serine/threonine kinase ATM
ATMIN	ATMIN	ATM interactor	ATM INteracting protein; ATM interactor; ATM/ATR-Substrate Chk2-Interacting Zn++-finger protein; ATM/ATR-substrate CHEK2-interacting zinc finger protein; ATM/ATR-substrate CHK2-interacting zinc finger protein; zinc finger protein 822
ATN1	ATN1	atrophin 1	atrophin-1; dentatorubral-pallidoluysian atrophy protein
ATOH1	ATOH1	atonal bHLH transcription factor 1	atonal homolog 1; atonal homolog bHLH transcription factor 1; basic helix-loop-helix family member a14; class A basic helix-loop-helix protein 14; helix-loop-helix protein hATH-1; protein atonal homolog 1; transcription factor ATOH1
ATOH7	ATOH7	atonal bHLH transcription factor 7	atonal homolog 7; atonal homolog bHLH transcription factor 7; class A basic helix-loop-helix protein 13; helix-loop-helix protein hATH-5; protein atonal homolog 7; transcription factor ATOH7
ATOH8	ATOH8	atonal bHLH transcription factor 8	atonal homolog 6; atonal homolog 8; atonal homolog bHLH transcription factor 8; basic helix loop helix transcription factor 6; class A basic helix-loop-helix protein 21; helix-loop-helix protein hATH-6; protein atonal homolog 8; transcription factor ATOH8
ATOSA	ATOSA	atos homolog A	atos homolog protein A; family with sequence similarity 214 member A; protein FAM214A
ATOSB	ATOSB	atos homolog B	atos homolog protein B; family with sequence similarity 214 member B; protein FAM214B
ATOX1	ATOX1	antioxidant 1 copper chaperone	ATX1 antioxidant protein 1 homolog; copper transport protein ATOX1; metal transport protein ATX1
ATP10A	ATP10A	ATPase phospholipid transporting 10A (putative)	ATPase type IV, phospholipid transporting (P-type); ATPase, Class V, type 10C; ATPase, class V, type 10A; P4-ATPase flippase complex alpha subunit ATP10A; aminophospholipid translocase VA; phospholipid-transporting ATPase VA; probable phospholipid-transporting ATPase VA
ATP10B	ATP10B	ATPase phospholipid transporting 10B (putative)	ATPase, class V, type 10B; P4-ATPase flippase complex alpha subunit ATP10B; phospholipid-transporting ATPase VB; probable phospholipid-transporting ATPase VB
ATP10D	ATP10D	ATPase phospholipid transporting 10D (putative)	ATPase, class V, type 10D; P4-ATPase flippase complex alpha subunit ATP10D; phospholipid-transporting ATPase VD; probable phospholipid-transporting ATPase VD; type IV aminophospholipid transporting ATPase
ATP11A	ATP11A	ATPase phospholipid transporting 11A	ATPase, class VI, type 11A; P4-ATPase flippase complex alpha subunit ATP11A; phospholipid-translocating ATPase; phospholipid-transporting ATPase IH; potential phospholipid-transporting ATPase IH; probable phospholipid-transporting ATPase IH
ATP11B	ATP11B	ATPase phospholipid transporting 11B (putative)	ATPase IR; ATPase, class VI, type 11B; P4-ATPase flippase complex alpha subunit ATP11B; phospholipid-transporting ATPase IF; probable phospholipid-transporting ATPase IF
ATP11C	ATP11C	ATPase phospholipid transporting 11C	ATPase, class VI, type 11C; P4-ATPase flippase complex alpha subunit ATP11C; phospholipid-transporting ATPase IG; probable phospholipid-transporting ATPase IG
ATP12A	ATP12A	ATPase H+/K+ transporting non-gastric alpha2 subunit	ATPase, H+/K+ transporting, nongastric, alpha polypeptide; ATPase, Na+/K+ transporting, alpha polypeptide-like 1; HK alpha 2; non-gastric Na(+)/K(+) ATPase subunit alpha; potassium-transporting ATPase alpha chain 2; sodium pump
ATP13A1	ATP13A1	ATPase 13A1	ATPase type 13A1; cation transporting ATPase; endoplasmic reticulum P5A-ATPase; endoplasmic reticulum transmembrane helix translocase; manganese-transporting ATPase 13A1; probable cation-transporting ATPase 13A1
ATP13A2	ATP13A2	ATPase cation transporting 13A2	ATPase 13A2; ATPase type 13A2; cation-transporting ATPase 13A2; polyamine-transporting ATPase 13A2; probable cation-transporting ATPase 13A2
ATP13A3	ATP13A3	ATPase 13A3	ATPase family homolog up-regulated in senescence cells 1; ATPase type 13A3; polyamine-transporting ATPase 13A3; probable cation-transporting ATPase 13A3; putrescine transporting ATPase
ATP13A4	ATP13A4	ATPase 13A4	ATPase type 13A4; P5-ATPase; cation-transporting P5-ATPase; probable cation-transporting ATPase 13A4
ATP13A5	ATP13A5	ATPase 13A5	ATPase type 13A5; P5-ATPase; probable cation-transporting ATPase 13A5
ATP1A1	ATP1A1	ATPase Na+/K+ transporting subunit alpha 1	ATPase, Na+/K+ transporting, alpha 1 polypeptide; Na(+)/K(+) ATPase alpha-1 subunit; Na+/K+ ATPase 1; Na, K-ATPase, alpha-A catalytic polypeptide; Na,K-ATPase alpha-1 subunit; Na,K-ATPase catalytic subunit alpha-A protein; sodium pump subunit alpha-1; sodium-potassium ATPase catalytic subunit alpha-1; sodium-potassium-ATPase, alpha 1 polypeptide; sodium/potassium-transporting ATPase subunit alpha…
ATP1A2	ATP1A2	ATPase Na+/K+ transporting subunit alpha 2	ATPase Na+/K+ transporting alpha 2 polypeptide; Na(+)/K(+) ATPase alpha-2 subunit; Na+/K+ ATPase, alpha-A(+) catalytic polypeptide; Na+/K+ ATPase, alpha-B polypeptide; sodium pump subunit alpha-2; sodium-potassium ATPase catalytic subunit alpha-2; sodium/potassium-transporting ATPase alpha-2 chain; sodium/potassium-transporting ATPase subunit alpha-2
ATP1A3	ATP1A3	ATPase Na+/K+ transporting subunit alpha 3	ATPase, Na+/K+ transporting, alpha 3 polypeptide; Na(+)/K(+) ATPase alpha(III) subunit; Na(+)/K(+) ATPase alpha-3 subunit; Na+, K+ activated adenosine triphosphatase alpha subunit; Na+/K+ ATPase 3; sodium pump subunit alpha-3; sodium-potassium ATPase catalytic subunit alpha-3; sodium-potassium-ATPase, alpha 3 polypeptide; sodium/potassium-transporting ATPase alpha-3 chain; sodium/potassium-transp…
ATP1A4	ATP1A4	ATPase Na+/K+ transporting subunit alpha 4	ATPase, Na+/K+ transporting, alpha 4 polypeptide; ATPase, Na+/K+ transporting, alpha polypeptide-like 2; Na(+)/K(+) ATPase alpha-4 subunit; Na+/K+ ATPase 4; Na+/K+ ATPase, alpha-D polypeptide; Na,K-ATPase subunit alpha-C; sodium pump 4; sodium pump subunit alpha-4; sodium-potassium ATPase catalytic subunit alpha-4; sodium/potassium-transporting ATPase alpha-4 chain; sodium/potassium-transporting …
ATP1B1	ATP1B1	ATPase Na+/K+ transporting subunit beta 1	ATPase, Na+/K+ transporting, beta 1 polypeptide; Beta 1-subunit of Na(+),K(+)-ATPase; Na, K-ATPase beta-1 polypeptide; adenosinetriphosphatase; sodium pump subunit beta-1; sodium-potassium ATPase subunit beta 1 (non-catalytic); sodium/potassium-dependent ATPase beta-1 subunit; sodium/potassium-transporting ATPase beta-1 chain; sodium/potassium-transporting ATPase subunit beta-1
ATP1B2	ATP1B2	ATPase Na+/K+ transporting subunit beta 2	ATPase, Na+/K+ transporting, beta 2 polypeptide; Na, K-ATPase beta-2 polypeptide; adhesion molecule in glia; adhesion molecule on glia; sodium pump subunit beta-2; sodium-potassium ATPase subunit beta 2 (non-catalytic); sodium/potassium-dependent ATPase beta-2 subunit; sodium/potassium-dependent ATPase subunit beta-2; sodium/potassium-transporting ATPase beta-2 chain; sodium/potassium-transportin…
ATP1B3	ATP1B3	ATPase Na+/K+ transporting subunit beta 3	ATPase, Na+/K+ transporting, beta 3 polypeptide; Na, K-ATPase beta-3 polypeptide; sodium pump subunit beta-3; sodium-potassium ATPase subunit beta 3 (non-catalytic); sodium/potassium-dependent ATPase subunit beta-3; sodium/potassium-transporting ATPase beta-3 chain; sodium/potassium-transporting ATPase subunit beta-3
ATP1B4	ATP1B4	ATPase Na+/K+ transporting family member beta 4	ATPase, Na+/K+ transporting, beta 4 polypeptide; BetaM; Na,K-ATPase beta m-subunit; X,K-ATPase beta-m subunit; protein ATP1B4; x/potassium-transporting ATPase subunit beta-m
ATP23	ATP23	ATP23 metallopeptidase and ATP synthase assembly factor homolog	Ku70-binding protein 3; XRCC6-binding protein 1; mitochondrial inner membrane protease ATP23 homolog
ATP2A1	ATP2A1	ATPase sarcoplasmic/endoplasmic reticulum Ca2+ transporting 1	ATPase, Ca++ transporting, cardiac muscle, fast twitch 1; SR Ca(2+)-ATPase 1; calcium pump 1; endoplasmic reticulum class 1/2 Ca(2+) ATPase; sarcoplasmic/endoplasmic reticulum calcium ATPase 1
ATP2A2	ATP2A2	ATPase sarcoplasmic/endoplasmic reticulum Ca2+ transporting 2	ATPase Ca++ transporting cardiac muscle slow twitch 2; ATPase, Ca++ dependent, slow-twitch, cardiac muscle-2; SR Ca(2+)-ATPase 2; calcium pump 2; cardiac Ca2+ ATPase; endoplasmic reticulum class 1/2 Ca(2+) ATPase; sarcoplasmic/endoplasmic reticulum calcium ATPase 2
ATP2A3	ATP2A3	ATPase sarcoplasmic/endoplasmic reticulum Ca2+ transporting 3	ATPase, Ca(2+)-transporting, ubiquitous; ATPase, Ca++ transporting, ubiquitous; SR Ca(2+)-ATPase 3; adenosine triphosphatase, calcium; calcium pump 3; calcium-translocating P-type ATPase; sarco/endoplasmic reticulum Ca2+ -ATPase; sarcoplasmic/endoplasmic reticulum calcium ATPase 3
ATP2B1	ATP2B1	ATPase plasma membrane Ca2+ transporting 1	ATPase, Ca++ transporting, plasma membrane 1; plasma membrane calcium pump; plasma membrane calcium-transporting ATPase 1
ATP2B2	ATP2B2	ATPase plasma membrane Ca2+ transporting 2	ATPase, Ca++ transporting, plasma membrane 2; plasma membrane Ca(2+)-ATPase; plasma membrane Ca2+ pump 2; plasma membrane calcium ATPase; plasma membrane calcium pump; plasma membrane calcium-transporting ATPase 2
ATP2B3	ATP2B3	ATPase plasma membrane Ca2+ transporting 3	ATPase, Ca++ transporting, plasma membrane 3; cilia and flagella associated protein 39; plasma membrane calcium ATPase; plasma membrane calcium pump; plasma membrane calcium-transporting ATPase 3
ATP2B4	ATP2B4	ATPase plasma membrane Ca2+ transporting 4	ATPase, Ca++ transporting, plasma membrane 4; matrix-remodeling-associated protein 1; plasma membrane calcium-transporting ATPase 4; sarcolemmal calcium pump
ATP2C1	ATP2C1	ATPase secretory pathway Ca2+ transporting 1	ATP-dependent Ca(2+) pump PMR1; ATPase 2C1; ATPase, Ca(2+)-sequestering; ATPase, Ca++ transporting, type 2C, member 1; Ca(2+)/Mn(2+)-ATPase 2C1; HUSSY-28; calcium-transporting ATPase type 2C member 1; secretory pathway Ca(2+)-transporting ATPase type 1; secretory pathway Ca2+/Mn2+ ATPase 1
ATP2C2	ATP2C2	ATPase secretory pathway Ca2+ transporting 2	ATPase 2C2; ATPase, Ca++ transporting, type 2C, member 2; Ca(2+)/Mn(2+)-ATPase 2C2; calcium-transporting ATPase type 2C member 2; secretory pathway Ca(2+)-ATPase 2; secretory pathway Ca(2+)-transporting ATPase type 2; secretory pathway calcium ATPase 2
ATP4A	ATP4A	ATPase H+/K+ transporting subunit alpha	ATPase H+/K+ transporting alpha subunit; ATPase, H+/K+ exchanging, alpha polypeptide; ATPase, H+/K+ transporting, alpha polypeptide; epididymis secretory sperm binding protein; gastric H+/K+ ATPase alpha subunit; gastric H,K-ATPase catalytic subunit; gastric hydrogen-potassium ATPase; potassium-transporting ATPase alpha chain 1; proton pump
ATP4B	ATP4B	ATPase H+/K+ transporting subunit beta	ATPase H+/K+ transporting beta subunit; ATPase, H+/K+ exchanging, beta polypeptide; ATPase, H+/K+ transporting, beta polypeptide; gastric H(+)/K(+) ATPase subunit beta; gastric H+/K+ ATPase beta subunit; gastric hydrogen-potassium ATPase, beta; potassium-transporting ATPase beta chain; potassium-transporting ATPase subunit beta; proton pump beta chain
ATP5F1A	ATP5F1A	ATP synthase F1 subunit alpha	ATP synthase alpha chain, mitochondrial; ATP synthase subunit alpha, mitochondrial; ATP synthase, H+ transporting, mitochondrial F1 complex, alpha subunit 1, cardiac muscle; ATP sythase (F1-ATPase) alpha subunit; epididymis secretory sperm binding protein Li 123m; mitochondrial ATP synthetase, oligomycin-resistant
ATP5F1B	ATP5F1B	ATP synthase F1 subunit beta	ATP synthase subunit beta, mitochondrial; ATP synthase, H+ transporting, mitochondrial F1 complex, beta polypeptide; epididymis secretory protein Li 271; mitochondrial ATP synthase beta subunit; mitochondrial ATP synthetase, beta subunit
ATP5F1C	ATP5F1C	ATP synthase F1 subunit gamma	ATP synthase gamma chain, mitochondrial; ATP synthase subunit gamma, mitochondrial; ATP synthase, H+ transporting, mitochondrial F1 complex, gamma polypeptide 1; F-ATPase gamma subunit; mitochondrial ATP synthase, gamma subunit 1
ATP5F1D	ATP5F1D	ATP synthase F1 subunit delta	ATP synthase subunit delta, mitochondrial; ATP synthase, H+ transporting, mitochondrial F1 complex, delta subunit; F-ATPase delta subunit; mitochondrial ATP synthase complex delta-subunit precusor; mitochondrial ATP synthase, delta subunit
ATP5F1E	ATP5F1E	ATP synthase F1 subunit epsilon	ATP synthase subunit epsilon, mitochondrial; ATP synthase, H+ transporting, mitochondrial F1 complex, epsilon subunit; F(0)F(1)-ATPase; H(+)-transporting two-sector ATPase; mitochondrial ATP synthase epsilon chain; mitochondrial ATPase
ATP5IF1	ATP5IF1	ATP synthase inhibitory factor subunit 1	ATP synthase F1 subunit epsilon; ATP synthase inhibitor protein; ATPase inhibitor protein; ATPase inhibitor, mitochondrial; ATPase inhibitory factor 1; IF(1); IF1; inhibitor of F(1)F(o)-ATPase
ATP5MC1	ATP5MC1	ATP synthase membrane subunit c locus 1	ATP synthase F(0) complex subunit C1, mitochondrial; ATP synthase lipid-binding protein, mitochondrial; ATP synthase proteolipid P1; ATP synthase proton-transporting mitochondrial F(0) complex subunit C1; ATP synthase subunit 9; ATP synthase, H+ transporting, mitochondrial F0 complex, subunit C1 (subunit 9); ATP synthase, H+ transporting, mitochondrial F0 complex, subunit c (subunit 9); ATP synth…
ATP5MC2	ATP5MC2	ATP synthase membrane subunit c locus 2	ATP synthase F(0) complex subunit C2, mitochondrial; ATP synthase c subunit; ATP synthase lipid-binding protein, mitochondrial; ATP synthase proteolipid P2; ATP synthase proton-transporting mitochondrial F(0) complex subunit C2; ATP synthase, H+ transporting, mitochondrial F0 complex, subunit C2 (subunit 9); ATP synthase, H+ transporting, mitochondrial Fo complex subunit C2 (subunit 9); ATPase pr…
ATP5MC3	ATP5MC3	ATP synthase membrane subunit c locus 3	ATP synthase F(0) complex subunit C3, mitochondrial; ATP synthase lipid-binding protein, mitochondrial; ATP synthase proteolipid P3; ATP synthase proton-transporting mitochondrial F(0) complex subunit C3; ATP synthase subunit 9; ATP synthase, H+ transporting, mitochondrial F0 complex, subunit C3 (subunit 9); ATP synthase, H+ transporting, mitochondrial Fo complex subunit C3 (subunit 9); ATP synth…
ATP5ME	ATP5ME	ATP synthase membrane subunit e	ATP synthase e chain, mitochondrial; ATP synthase subunit e, mitochondrial; ATP synthase, H+ transporting, mitochondrial F0 complex, subunit E; ATP synthase, H+ transporting, mitochondrial Fo complex subunit E; ATPase subunit e; F1F0-ATP synthase, murine e subunit
ATP5MF	ATP5MF | LOC124901481	ATP synthase membrane subunit f | ATP synthase subunit f, mitochondrial-like	ATP synthase f chain, mitochondrial; ATP synthase subunit f, mitochondrial; ATP synthase, H+ transporting, mitochondrial F0 complex, subunit f; ATP synthase, H+ transporting, mitochondrial Fo complex subunit F2; F1F0-type ATPase subunit f; F1Fo-ATP synthase complex Fo membrane domain f subunit; F1Fo-ATPase synthase f subunit | ATP synthase subunit f, mitochondrial-like; LOW QUALITY PROTEIN: ATP s…
ATP5MG	ATP5MG	ATP synthase membrane subunit g	ATP synthase g chain, mitochondrial; ATP synthase subunit g, mitochondrial; ATP synthase, H+ transporting, mitochondrial F0 complex, subunit G; ATP synthase, H+ transporting, mitochondrial F1F0, subunit g; ATP synthase, H+ transporting, mitochondrial Fo complex subunit G; ATPase subunit G; F1F0-type ATP synthase subunit g; F1Fo-ATP synthase complex Fo membrane domain g subunit
ATP5MGL	ATP5MGL	ATP synthase membrane subunit g like	ATP synthase membrane subunit g-like protein; ATP synthase subunit g 2, mitochondrial; ATP synthase, H+ transporting, mitochondrial F0 complex, subunit G2 pseudogene; ATP synthase, H+ transporting, mitochondrial F1F0, subunit g; ATP synthase, H+ transporting, mitochondrial Fo complex subunit G2; ATPase subunit g 2; putative ATP synthase subunit g 2, mitochondrial
ATP5MJ	ATP5MJ	ATP synthase membrane subunit j	6.8 kDa mitochondrial proteolipid protein; 6.8-kDa proteolipid with N-terminal sequence Met-Leu-Gln (MLQ); ATP synthase membrane subunit 6.8PL; ATP synthase subunit ATP5MJ, mitochondrial; ATP synthase subunit ATP5MPL, mitochondrial
ATP5MK	ATP5MK	ATP synthase membrane subunit k	ATP synthase membrane subunit DAPIT, mitochondrial; ATP synthase membrane subunit K, mitochondrial; Diabetes Associated Protein in Insulin-sensitive Tissues; HCV F-transactivated protein 2; diabetes-associated protein in insulin-sensitive tissues; up-regulated during skeletal muscle growth 5 homolog; up-regulated during skeletal muscle growth protein 5; upregulated during skeletal muscle growth 5…
ATP5PB	ATP5PB	ATP synthase peripheral stalk-membrane subunit b	ATP synthase B chain, mitochondrial; ATP synthase F(0) complex subunit B1, mitochondrial; ATP synthase proton-transporting mitochondrial F(0) complex subunit B1; ATP synthase subunit b, mitochondrial; ATP synthase, H+ transporting, mitochondrial F0 complex, subunit B1; ATP synthase, H+ transporting, mitochondrial F0 complex, subunit b; ATP synthase, H+ transporting, mitochondrial Fo complex subun…
ATP5PD	ATP5PD	ATP synthase peripheral stalk subunit d	ATP synthase D chain, mitochondrial; ATP synthase subunit d, mitochondrial; ATP synthase, H+ transporting, mitochondrial F0 complex, subunit d; ATP synthase, H+ transporting, mitochondrial F1F0, subunit d; ATP synthase, H+ transporting, mitochondrial Fo complex subunit D; ATP synthase, H+ transporting, mitochondrial Fo complex, subunit d; ATPase subunit d; My032 protein
ATP5PF	ATP5PF	ATP synthase peripheral stalk subunit F6	ATP synthase subunit h; ATP synthase, H+ transporting, mitochondrial F0 complex, subunit F6; ATP synthase, H+ transporting, mitochondrial Fo complex subunit F6; ATP synthase-coupling factor 6, mitochondrial; ATPase subunit F6; coupling factor 6; mitochondrial ATP synthase, coupling factor 6; mitochondrial ATP synthase, subunit F6; mitochondrial ATPase coupling factor 6; proliferation-inducing pro…
ATP5PO	ATP5PO	ATP synthase peripheral stalk subunit OSCP	ATP synthase subunit O, mitochondrial; ATP synthase, H+ transporting, mitochondrial F1 complex, O subunit; human ATP synthase OSCP subunit; oligomycin sensitivity conferral protein oscp-like protein; oligomycin sensitivity conferring protein
ATP6AP1	ATP6AP1	ATPase H+ transporting accessory protein 1	ATPase, H+ transporting, lysosomal (vacuolar proton pump), subunit 1; ATPase, H+ transporting, lysosomal accessory protein 1; ATPase, H+ transporting, lysosomal interacting protein 1; H-ATPase subunit; V-ATPase Ac45 subunit; V-ATPase S1 accessory protein; V-ATPase subunit S1; V-type proton ATPase subunit S1; X-associated protein 3; epididymis secretory sperm binding protein; protein XAP-3; vacuol…
ATP6AP2	ATP6AP2	ATPase H+ transporting accessory protein 2	ATPase H(+)-transporting lysosomal-interacting protein 2; ATPase, H+ transporting, lysosomal (vacuolar proton pump) membrane sector associated protein M8-9; ATPase, H+ transporting, lysosomal accessory protein 2; ATPase, H+ transporting, lysosomal interacting protein 2; ER-localized type I transmembrane adapter; ER-localized type I transmembrane adaptor; N14F; V-ATPase M8.9 subunit; embryonic liv…
ATP6V0A1	ATP6V0A1	ATPase H+ transporting V0 subunit a1	ATPase, H+ transporting, lysosomal V0 subunit a1; ATPase, H+ transporting, lysosomal non-catalytic accessory protein 1 (110/116kD); H(+)-transporting two-sector ATPase, 116 kDa accessory protein A1; V-ATPase 116 kDa subunit a 1; V-ATPase 116 kDa subunit a1; V-ATPase subunit a1; V-type proton ATPase 116 kDa subunit a; V-type proton ATPase 116 kDa subunit a 1; V-type proton ATPase 116 kDa subunit a…
ATP6V0A2	ATP6V0A2	ATPase H+ transporting V0 subunit a2	A2V-ATPase; ATPase, H+ transporting, lysosomal V0 subunit a2; V-ATPase 116 kDa subunit a 2; V-ATPase 116 kDa subunit a2; V-ATPase subunit a2; V-type proton ATPase 116 kDa subunit a 2; V-type proton ATPase 116 kDa subunit a2; lysosomal H(+)-transporting ATPase V0 subunit a 2; lysosomal H(+)-transporting ATPase V0 subunit a2; regeneration and tolerance factor; v-type proton ATPase 116 kDa subunit a…
ATP6V0A4	ATP6V0A4	ATPase H+ transporting V0 subunit a4	ATPase, H+ transporting, lysosomal (vacuolar proton pump) non-catalytic accessory protein 1B; ATPase, H+ transporting, lysosomal (vacuolar proton pump) non-catalytic accessory protein 2 (38kD); ATPase, H+ transporting, lysosomal V0 subunit a4; H(+)-transporting two-sector ATPase, noncatalytic accessory protein 1B; V-ATPase 116 kDa; V-ATPase 116 kDa isoform a 4; V-ATPase subunit a4; V-type proton …
ATP6V0B	ATP6V0B	ATPase H+ transporting V0 subunit b	ATPase, H+ transporting, lysosomal 21kDa, V0 subunit b; ATPase, H+ transporting, lysosomal, 21-KD, V0 subunit C-prime, prime; ATPase, H+ transporting, lysosomal, subunit F; H(+)-transporting two-sector ATPase, subunit F; V-ATPase 21 kDa proteolipid subunit; V-ATPase 21 kDa proteolipid subunit c''; V-ATPase subunit b; V-ATPase subunit c''; V-type proton ATPase 21 kDa proteolipid subunit; V-type pr…
ATP6V0C	ATP6V0C	ATPase H+ transporting V0 subunit c	ATPase, H+ transporting, lysosomal 16kDa, V0 subunit c; H(+)-transporting two-sector ATPase, 16 kDa subunit; V-ATPase 16 kDa proteolipid subunit; V-ATPase 16 kDa proteolipid subunit c; V-type proton ATPase 16 kDa proteolipid subunit; V-type proton ATPase 16 kDa proteolipid subunit c; vacuolar ATP synthase 16 kDa proteolipid subunit; vacuolar H+ ATPase proton channel subunit; vacuolar proton pump …
ATP6V0D1	ATP6V0D1	ATPase H+ transporting V0 subunit d1	32 kDa accessory protein; ATPase, H+ transporting, lysosomal (vacuolar proton pump), member D; ATPase, H+ transporting, lysosomal 38kDa, V0 subunit d1; H(+)-transporting two-sector ATPase, subunit D; V-ATPase 40 KDa accessory protein; V-ATPase AC39 subunit; V-ATPase subunit d 1; V-ATPase, subunit D; V-type proton ATPase subunit d 1; vacuolar proton pump subunit d 1
ATP6V0D2	ATP6V0D2	ATPase H+ transporting V0 subunit d2	ATPase, H+ transporting, lysosomal 38kDa, V0 subunit d2; V-ATPase subunit d 2; V-type proton ATPase subunit d 2; vacuolar proton pump subunit d 2
ATP6V0E1	ATP6V0E1	ATPase H+ transporting V0 subunit e1	ATPase, H+ transporting, lysosomal 9kDa, V0 subunit e1; H(+)-transporting two-sector ATPase, subunit H; V-ATPase 9.2 kDa membrane accessory protein; V-ATPase H subunit; V-ATPase M9.2 subunit; V-ATPase subunit e 1; V-type proton ATPase subunit e 1; vacuolar ATP synthase subunit H; vacuolar proton pump H subunit; vacuolar proton pump subunit e 1; vacuolar proton-ATPase subunit M9.2
ATP6V0E2	ATP6V0E2	ATPase H+ transporting V0 subunit e2	H+-ATPase e2 subunit; V-ATPase subunit e 2; V-ATPase subunit e1; V-type proton ATPase subunit e 2; lysosomal 9 kDa H(+)-transporting ATPase V0 subunit e2; vacuolar proton pump subunit e 2; vacuolar proton-ATPase subunit
ATP6V1A	ATP6V1A	ATPase H+ transporting V1 subunit A	ATPase, H+ transporting, lysosomal 70kDa, V1 subunit A; ATPase, H+ transporting, lysosomal, subunit A1; H(+)-transporting two-sector ATPase, subunit A; H+-transporting ATPase chain A, vacuolar (VA68 type); V-ATPase 69 kDa subunit 1; V-ATPase A subunit 1; V-ATPase subunit A; V-type proton ATPase (V-ATPase) catalytic subunit A; V-type proton ATPase catalytic subunit A; vacuolar proton pump alpha su…
ATP6V1B1	ATP6V1B1	ATPase H+ transporting V1 subunit B1	ATPase, H+ transporting, lysosomal 56/58kDa, V1 subunit B1; H(+)-transporting two-sector ATPase, 58kD subunit; H+-ATPase beta 1 subunit; V-ATPase B1 subunit; V-ATPase subunit B 1; V-type proton ATPase subunit B, kidney isoform; endomembrane proton pump 58 kDa subunit; vacuolar proton pump 3; vacuolar proton pump subunit B 1; vacuolar proton pump, subunit 3
ATP6V1B2	ATP6V1B2	ATPase H+ transporting V1 subunit B2	ATPase, H+ transporting, lysosomal 56/58kDa, V1 subunit B2; H+ transporting two-sector ATPase; V-ATPase B2 subunit; V-ATPase subunit B 2; V-type proton ATPase subunit B, brain isoform; endomembrane proton pump 58 kDa subunit; testicular secretory protein Li 65; vacuolar H+-ATPase 56,000 subunit; vacuolar proton pump subunit B 2
ATP6V1C1	ATP6V1C1	ATPase H+ transporting V1 subunit C1	ATPase, H+ transporting, lysosomal 42kDa, V1 subunit C1; H(+)-transporting two-sector ATPase, subunit C; H+ -ATPase C subunit; H+-transporting ATPase chain C, vacuolar; V-ATPase C subunit; V-ATPase subunit C 1; V-type proton ATPase subunit C 1; subunit C of vacuolar proton-ATPase V1 domain; testicular tissue protein Li 223; vacuolar ATP synthase subunit C; vacuolar proton pump C subunit; vacuolar…
ATP6V1C2	ATP6V1C2	ATPase H+ transporting V1 subunit C2	ATPase, H+ transporting, lysosomal 42kDa, V1 subunit C2; V-ATPase C2 subunit; V-type proton ATPase subunit C 2; vacuolar proton pump subunit C 2
ATP6V1D	ATP6V1D	ATPase H+ transporting V1 subunit D	ATPase, H+ transporting lysosomal, member M; ATPase, H+ transporting, lysosomal (vacuolar proton pump); ATPase, H+ transporting, lysosomal 34kDa, V1 subunit D; H(+)-transporting two-sector ATPase, subunit M; V-ATPase 28 kDa accessory protein; V-ATPase D subunit; V-ATPase subunit D; V-type proton ATPase subunit D; vacuolar ATP synthase subunit D; vacuolar H-ATPase subunit D; vacuolar proton pump D…
ATP6V1E1	ATP6V1E1	ATPase H+ transporting V1 subunit E1	ATPase, H+ transporting, lysosomal 31kDa, V1 subunit E1; H(+)-transporting two-sector ATPase, 31kDa subunit; H+-transporting ATP synthase chain E, vacuolar; V-ATPase 31 kDa subunit; V-ATPase subunit E 1; V-ATPase, subunit E; V-type proton ATPase subunit E 1; vacuolar proton pump subunit E 1
ATP6V1E2	ATP6V1E2	ATPase H+ transporting V1 subunit E2	ATPase, H+ transporting, lysosomal 31kDa, V1 subunit E2; V-ATPase subunit E 2; V-type proton ATPase subunit E 2; testis secretory sperm-binding protein Li 235P; vacuolar proton pump subunit E 2; vacuolar-type proton-translocating ATPase subunit E1
ATP6V1F	ATP6V1F	ATPase H+ transporting V1 subunit F	ATPase, H+ transporting, lysosomal 14kDa, V1 subunit F; ATPase, vacuolar, 14 kD; H(+)-transporting two-sector ATPase, 14kD subunit; V-ATPase 14 kDa subunit; V-ATPase F subunit; V-ATPase subunit F; V-type proton ATPase subunit F; adenosinetriphosphatase 14k chain; vacuolar ATP synthase subunit F; vacuolar proton pump F subunit; vacuolar proton pump subunit F
ATP6V1G1	ATP6V1G1	ATPase H+ transporting V1 subunit G1	ATPase, H+ transporting, lysosomal (vacuolar proton pump), member J; ATPase, H+ transporting, lysosomal 13kDa, V1 subunit G1; V-ATPase 13 kDa subunit 1; V-ATPase subunit G 1; V-type proton ATPase subunit G 1; vacuolar ATP synthase subunit M16; vacuolar H(+)-ATPase subunit G 1; vacuolar proton pump subunit G 1; vacuolar proton pump subunit M16
ATP6V1G2	ATP6V1G2	ATPase H+ transporting V1 subunit G2	ATPase, H+ transporting, lysosomal (vacuolar proton pump); ATPase, H+ transporting, lysosomal 13kDa, V1 subunit G2; H(+)-transporting two-sector ATPase, subunit G2; V-ATPase 13 kDa subunit 2; V-type proton ATPase subunit G 2; vacuolar ATP synthase subunit G 2; vacuolar proton pump G subunit 2
ATP6V1G3	ATP6V1G3	ATPase H+ transporting V1 subunit G3	ATPase, H+ transporting, lysosomal (vacuolar proton pump) subunit G3; ATPase, H+ transporting, lysosomal 13kDa, V1 subunit G3; V-ATPase 13 kDa subunit 3; V-ATPase G subunit 3; V-ATPase G3 subunit; V-ATPase subunit G 3; V-type proton ATPase subunit G 3; vacuolar ATP synthase subunit G 3; vacuolar proton pump G subunit 3; vacuolar proton pump subunit G 3; vacuolar proton pump, subunit G3
ATP6V1H	ATP6V1H	ATPase H+ transporting V1 subunit H	ATPase, H+ transporting, lysosomal 50/57kDa, V1 subunit H; V-ATPase 50/57 kDa subunits; V-ATPase subunit H; V-type proton ATPase subunit H; nef-binding protein 1; protein VMA13 homolog; vacuolar ATP synthase subunit H; vacuolar ATPase subunit H; vacuolar proton pump subunit H; vacuolar proton pump subunit SFD
ATP7A	ATP7A	ATPase copper transporting alpha	ATPase, Cu++ transporting, alpha polypeptide; Cu++-transporting P-type ATPase; Menkes disease-associated protein; copper pump 1; copper-transporting ATPase 1
ATP7B	ATP7B	ATPase copper transporting beta	ATPase, Cu(2+)- transporting, beta polypeptide; ATPase, Cu++ transporting, beta polypeptide; Wilson disease-associated protein; copper pump 2; copper-transporting ATPase 2; copper-transporting protein ATP7B
ATP8A1	ATP8A1	ATPase phospholipid transporting 8A1	ATPase II; ATPase class I type 8A member 1; ATPase, aminophospholipid transporter (APLT), class I, type 8A, member 1; P4-ATPase flippase complex alpha subunit ATP8A1; aminophospholipid translocase; chromaffin granule ATPase II; phospholipid-transporting ATPase IA; probable phospholipid-transporting ATPase IA
ATP8A2	ATP8A2	ATPase phospholipid transporting 8A2	ATPase, aminophospholipid transporter, class I, type 8A, member 2; ATPase, aminophospholipid transporter-like, class I, type 8A, member 2; P4-ATPase flippase complex alpha subunit ATP8A2; phospholipid-transporting ATPase IB; probable phospholipid-transporting ATPase IB
ATP8B1	ATP8B1	ATPase phospholipid transporting 8B1	ATPase, aminophospholipid transporter, class I, type 8B, member 1; ATPase, class I, type 8B, member 1; E1-E2 ATPase; P4-ATPase flippase complex alpha subunit ATP8B1; familial intrahepatic cholestasis type 1; phospholipid-transporting ATPase IC; probable phospholipid-transporting ATPase IC
ATP8B2	ATP8B2	ATPase phospholipid transporting 8B2	36/8-9 fusion protein with epitope for anti-lectin antibody; ATPase, aminophospholipid transporter, class I, type 8B, member 2; ATPase, class I, type 8B, member 2; P4-ATPase flippase complex alpha subunit ATP8B2; phospholipid-transporting ATPase ID; probable phospholipid-transporting ATPase ID
ATP8B3	ATP8B3	ATPase phospholipid transporting 8B3	ATPase, aminophospholipid transporter, class I, type 8B, member 3; ATPase, class I, type 8B, member 3; aminophospholipid translocase ATP8B3; phospholipid-transporting ATPase IK; potential phospholipid-transporting ATPase IK; probable phospholipid-transporting ATPase IK
ATP8B4	ATP8B4	ATPase phospholipid transporting 8B4 (putative)	ATPase, class I, type 8B, member 4; P4-ATPase flippase complex alpha subunit ATP8B4; potential phospholipid-transporting ATPase IM; probable phospholipid-transporting ATPase IM
ATP9A	ATP9A	ATPase phospholipid transporting 9A (putative)	ATPase type IV, phospholipid-transporting (P-type),(putative); ATPase, class II, type 9A; phospholipid-transporting ATPase IIA; probable phospholipid-transporting ATPase IIA
ATP9B	ATP9B	ATPase phospholipid transporting 9B (putative)	ATPase type IV, phospholipid transporting (P-type); ATPase, class II, type 9B; macrophage MHC receptor 1; probable phospholipid-transporting ATPase IIB
ATPAF1	ATPAF1	ATP synthase mitochondrial F1 complex assembly factor 1	ATP synthase mitochondrial F1 complex assembly factor 1; homolog of yeast ATP11
ATPAF2	ATPAF2	ATP synthase mitochondrial F1 complex assembly factor 2	ATP synthase mitochondrial F1 complex assembly factor 2; ATP12 homolog
ATPSCKMT	ATPSCKMT	ATP synthase c subunit lysine N-methyltransferase	ATP synthase subunit C lysine N-methyltransferase; family with sequence similarity 173 member B; protein FAM173B; protein N-lysine methyltransferase FAM173B
ATR	ATR	ATR serine/threonine kinase	FRAP-related protein-1; MEC1, mitosis entry checkpoint 1, homolog; ataxia telangiectasia and Rad3-related protein; serine/threonine-protein kinase ATR
ATRAID	ATRAID	all-trans retinoic acid induced differentiation factor	all-trans retinoic acid-induced differentiation factor; apoptosis related protein APR-3; apoptosis-related protein 3
ATRIP	ATRIP	ATR interacting protein	ATM and Rad3-related-interacting protein; ATR-interacting protein
ATRN	ATRN	attractin	attractin; attractin-2; mahogany homolog; mahogany protein
ATRNL1	ATRNL1	attractin like 1	attractin-like protein 1
ATRX	ATRX	ATRX chromatin remodeler	ATP-dependent helicase ATRX; X-linked helicase II; X-linked nuclear protein; transcriptional regulator ATRX
ATXN1	ATXN1	ataxin 1	alternative ataxin1; ataxin-1; spinocerebellar ataxia type 1 protein
ATXN10	ATXN10	ataxin 10	ataxin-10; brain protein E46 homolog; spinocerebellar ataxia type 10 protein
ATXN1L	ATXN1L	ataxin 1 like	ataxin-1-like; brother of ATXN1; brother of ataxin-1
ATXN2	ATXN2	ataxin 2	ataxin-2; spinocerebellar ataxia type 2 protein; trinucleotide repeat-containing gene 13 protein
ATXN2L	ATXN2L	ataxin 2 like	ataxin 2 related protein; ataxin-2 domain protein; ataxin-2-like protein
ATXN3	ATXN3	ataxin 3	Machado-Joseph disease protein 1; ataxin-3; josephin; olivopontocerebellar ataxia 3; spinocerebellar ataxia type 3 protein
ATXN3L	ATXN3L	ataxin 3 like	ataxin-3-like protein; machado-Joseph disease protein 1-like; putative ataxin-3-like protein
ATXN7	ATXN7	ataxin 7	Autosomal dominant cerebellar ataxia with retinal degeneration; SAGA associated factor 73 kDa homolog; ataxin-7; spinocerebellar ataxia type 7 protein
ATXN7L1	ATXN7L1	ataxin 7 like 1	ataxin 7-like 4; ataxin-7-like protein 1; ataxin-7-like protein 4
ATXN7L2	ATXN7L2	ataxin 7 like 2	ataxin 7-like 1; ataxin-7-like protein 2
ATXN7L3	ATXN7L3	ataxin 7 like 3	ataxin-7-like protein 3
ATXN7L3B	ATXN7L3B	ataxin 7 like 3B	ataxin-7-like protein 3B; putative ataxin-7-like protein 3B
AUH	AUH	AU RNA binding methylglutaconyl-CoA hydratase	3-MG-CoA hydratase; 3-methylglutaconyl-CoA hydratase; AU RNA binding protein/enoyl-CoA hydratase; AU RNA-binding protein/enoyl-Coenzyme A hydratase; AU-binding protein/Enoyl-CoA hydratase; AU-specific RNA-binding enoyl-CoA hydratase; itaconyl-CoA hydratase; methylglutaconyl-CoA hydratase, mitochondrial
AUNIP	AUNIP	aurora kinase A and ninein interacting protein	aurora A-binding protein; aurora kinase A- and ninein-interacting protein
AUP1	AUP1	AUP1 lipid droplet regulating VLDL assembly factor	ancient ubiquitous protein 1; lipid droplet-regulating VLDL assembly factor AUP1
AURKA	AURKA	aurora kinase A	aurora 2; aurora kinase A; aurora/IPL1-like kinase; aurora/IPL1-related kinase 1; breast tumor-amplified kinase; protein phosphatase 1, regulatory subunit 47; serine/threonine protein kinase 15; serine/threonine-protein kinase 6; serine/threonine-protein kinase aurora-A
AURKAIP1	AURKAIP1	aurora kinase A interacting protein 1	28S ribosomal protein S38, mitochondrial; AURKA-interacting protein; aurora kinase A-interacting protein; aurora-A kinase interacting protein; mitochondrial small ribosomal subunit protein mS38; small ribosomal subunit protein mS38
AURKB	AURKB	aurora kinase B	aurora kinase B; aurora kinase B-Sv1; aurora kinase B-Sv2; aurora- and Ipl1-like midbody-associated protein 1; aurora- and Ipl1-like midbody-associated protein 1 homolog; aurora-1; aurora-B; aurora-related kinase 2; aurora/IPL1-related kinase 2; protein phosphatase 1, regulatory subunit 48; serine/threonine kinase 12; serine/threonine-protein kinase 12; serine/threonine-protein kinase 5; serine/t…
AURKC	AURKC	aurora kinase C	ARK-3; aurora 3; aurora kinase C; aurora-related kinase 3; aurora/IPL1-related kinase 3; aurora/IPL1/EG2 protein 2; epididymis secretory protein Li 90; serine/threonine kinase 13 (aurora/IPL1-like); serine/threonine-protein kinase 13; serine/threonine-protein kinase aurora-C
AUTS2	AUTS2	activator of transcription and developmental regulator AUTS2	AUTS2, activator of transcription and developmental regulator; autism susceptibility candidate 2; autism susceptibility gene 2 protein; autism-related protein 1
AVEN	AVEN	apoptosis and caspase activation inhibitor	apoptosis, caspase activation inhibitor; cell death regulator Aven; programmed cell death 12
AVIL	AVIL	advillin	advillin
AVL9	AVL9	AVL9 cell migration associated	AVL9 homolog (S. cerevisiase); late secretory pathway protein AVL9 homolog
AVP	AVP	arginine vasopressin	antidiuretic hormone; copeptin; neurohypophyseal; prepro-AVP-NP II; prepro-arginine-vasopressin-neurophysin II; vasopressin-neurophysin 2-copeptin; vasopressin-neurophysin II-copeptin
AVPI1	AVPI1	arginine vasopressin induced 1	AVP-induced protein 1; arginine vasopressin-induced protein 1; vasopressin-induced transcript
AVPR1A	AVPR1A	arginine vasopressin receptor 1A	SCCL vasopressin subtype 1a receptor; V1-vascular vasopressin receptor AVPR1A; V1a vasopressin receptor; antidiuretic hormone receptor 1A; vascular/hepatic-type arginine vasopressin receptor; vasopressin V1a receptor
AVPR1B	AVPR1B	arginine vasopressin receptor 1B	AVPR V1b; AVPR V3; V1B receptor; antidiuretic hormone receptor 1B; arginine vasopressin receptor 3; pituitary vasopressin receptor 3; vasopressin V1b receptor; vasopressin V3 receptor
AVPR2	AVPR2	arginine vasopressin receptor 2	AVPR V2; antidiuretic hormone receptor; renal-type arginine vasopressin receptor; vasopressin V2 receptor
AWAT1	AWAT1	acyl-CoA wax alcohol acyltransferase 1	acyl-CoA wax alcohol acyltransferase 1; diacyl-glycerol acyltransferase 2; diacylglycerol O-acyltransferase 2-like 3; diacylglycerol O-acyltransferase 2-like protein 3; diacylglycerol acyltransferase 2; long-chain-alcohol O-fatty-acyltransferase 1
AWAT2	AWAT2	acyl-CoA wax alcohol acyltransferase 2	11-cis-RE-synthase; 11-cis-specific retinyl-ester synthase; acyl-CoA retinol O-fatty-acyltransferase; acyl-CoA wax alcohol acyltransferase 2; diacylglycerol O-acyltransferase 2-like protein 4; diacylglycerol O-acyltransferase candidate 4; long-chain-alcohol O-fatty-acyltransferase 2; multifunctional O-acyltransferase; retinol O-fatty-acyltransferase
AXDND1	AXDND1	axonemal dynein light chain domain containing 1	axonemal dynein light chain domain-containing protein 1
AXIN1	AXIN1	axin 1	axin-1; axis inhibition protein 1; axis inhibitor 1; fused, mouse, homolog of; protein phosphatase 1, regulatory subunit 49
AXIN2	AXIN2	axin 2	axin-2; axin-like protein; axis inhibition protein 2; conductin
AXL	AXL	AXL receptor tyrosine kinase	AXL oncogene; AXL transforming sequence/gene; tyrosine-protein kinase receptor UFO
AZGP1	AZGP1	alpha-2-glycoprotein 1, zinc-binding	Alpha-2-glycoprotein, zinc; Zn-alpha2-glycoprotein; testicular tissue protein Li 227; zinc-alpha-2-glycoprotein; zn-alpha-2-GP; zn-alpha-2-glycoprotein
AZI2	AZI2	5-azacytidine induced 2	5-azacytidine induced gene 2; 5-azacytidine-induced protein 2; NAK-associated protein 1; NF-kappa-B-activating kinase-associated protein 1
AZIN1	AZIN1	antizyme inhibitor 1	antizyme inhibitor 1; ornithine decarboxylase antizyme inhibitor
AZIN2	AZIN2	antizyme inhibitor 2	ODC antizyme inhibitor-2; ODC-like protein; ODC-paralogue; antizyme inhibitor 2; arginine decarboxylase; ornithine decarboxylase like; ornithine decarboxylase-like protein; ornithine decarboxylase-paralog
AZU1	AZU1	azurocidin 1	azurocidin; cationic antimicrobial protein 37; cationic antimicrobial protein CAP37; heparin-binding protein; neutrophil azurocidin
B2M	B2M	beta-2-microglobulin	beta chain of MHC class I molecules; beta-2-microglobin; beta-2-microglobulin
B3GALNT1	B3GALNT1	beta-1,3-N-acetylgalactosaminyltransferase 1 (Globoside blood group)	P antigen synthase; P blood group globoside; UDP-Gal:betaGlcNAc beta 1,3-galactosyltransferase, polypeptide 3 (Globoside blood group); UDP-GalNAc:beta-1,3-N-acetylgalactosaminyltransferase 1; UDP-GalNAc:betaGlcNAc beta-1,3-galactosaminyltransferase, polypeptide 1 (Globoside blood group); UDP-N-acetylgalactosamine:globotriaosylceramide beta-1,3-N-acetylgalactosaminyltransferase; beta-1,3-GalNAc-T1…
B3GALNT2	B3GALNT2	beta-1,3-N-acetylgalactosaminyltransferase 2	UDP-GalNAc:beta-1,3-N-acetylgalactosaminyltransferase 2; UDP-GalNAc:betaGlcNAc beta-1,3-galactosaminyltransferase, polypeptide 2; beta-1,3-GalNAc-T2
B3GALT1	B3GALT1	beta-1,3-galactosyltransferase 1	UDP-Gal:betaGlcNAc beta 1,3-galactosyltransferase, polypeptide 1; UDP-galactose:beta-N-acetyl-glucosamine-beta-1,3-galactosyltransferase 1; beta-1,3-GalTase 1; beta-1,3-galactosyltransferase 1; beta3GalT1
B3GALT2	B3GALT2	beta-1,3-galactosyltransferase 2	UDP-Gal:betaGlcNAc beta 1,3-galactosyltransferase, polypeptide 2; UDP-galactose:2-acetamido-2-deoxy-D-glucose 3beta-galactosyltransferase 2; beta-1,3-GalTase 2; beta-1,3-galactosyltransferase 2; beta-3-galt2
B3GALT4	B3GALT4	beta-1,3-galactosyltransferase 4	UDP-Gal:betaGlcNAc beta 1,3-galactosyltransferase 4; UDP-Gal:betaGlcNAc beta 1,3-galactosyltransferase, polypeptide 4; UDP-galactose:beta-N-acetyl-galactosamine-beta-1,3-galactosyltransferase; b3Gal-T4; beta-1,3-GalTase 4; beta-1,3-galactosyltransferase 4; beta-3-galactosyltransferase 4; gal-T2; ganglioside galactosyltransferase
B3GALT5	B3GALT5	beta-1,3-galactosyltransferase 5	UDP-Gal:betaGlcNAc beta 1,3-galactosyltransferase, polypeptide 5; UDP-galactose:beta-N-acetylglucosamine beta-1,3-galactosyltransferase 5; beta-1,3-galactosyltransferase 5; homolog of C. elegans Bt toxin resistance gene bre-5
B3GALT6	B3GALT6	beta-1,3-galactosyltransferase 6	GAG GalTII; UDP-Gal:betaGal beta 1,3-galactosyltransferase 6; UDP-Gal:betaGal beta 1,3-galactosyltransferase polypeptide 6; UDP-Gal:betaGlcNAc beta 1,3-galactosyltransferase, polypeptide 6; beta-1,3-GalTase 6; beta-1,3-galactosyltransferase 6; beta3Gal-T6; galactosyltransferase II; galactosylxylosylprotein 3-beta-galactosyltransferase
B3GALT9	B3GALT9	beta-1,3-galactosyltransferase 9	UDP-GlcNAc:betaGal beta-1,3-N-acetylglucosaminyltransferase 10 (putative); UDP-GlcNAc:betaGal beta-1,3-N-acetylglucosaminyltransferase 5 pseudogene; beta-1,3-galactosyltransferase 9; putative UDP-GlcNAc:betaGal beta-1,3-N-acetylglucosaminyltransferase LOC100288842; putative UDP-GlcNAc:betaGal beta-1,3-N-acetylglucosaminyltransferase LOC402377
B3GAT1	B3GAT1	beta-1,3-glucuronyltransferase 1	LEU7 antigen; UDP-GlcUA:glycoprotein beta-1,3-glucuronyltransferase; galactosylgalactosylxylosylprotein 3-beta-glucuronosyltransferase 1; glucuronosyltransferase P
B3GAT2	B3GAT2	beta-1,3-glucuronyltransferase 2	UDP-glucuronosyltransferase S; UDP-glucuronyltransferase S; galactosylgalactosylxylosylprotein 3-beta-glucuronosyltransferase 2; glcAT-D; glucuronosyltransferase S; uridine diphosphate glucuronic acid:acceptor glucuronosyltransferase
B3GAT3	B3GAT3	beta-1,3-glucuronyltransferase 3	Sqv-8-like protein; UDP-GlcUA:Gal beta-1,3-Gal-R glucuronyltransferase; beta-1,3-glucuronyltransferase 3 (glucuronosyltransferase I); galactosylgalactosylxylosylprotein 3-beta-glucuronosyltransferase 3
B3GLCT	B3GLCT	beta 3-glucosyltransferase	UDP-GAL:beta-GlcNAc beta-1,3-galactosyltransferase-like; beta 1,3-galactosyltransferase-like; beta 3-glycosyltransferase-like; beta-1,3-glucosyltransferase
B3GNT2	B3GNT2	UDP-GlcNAc:betaGal beta-1,3-N-acetylglucosaminyltransferase 2	N-acetyllactosaminide beta-1,3-N-acetylglucosaminyltransferase 2; UDP-GlcNAc:betaGal beta-1,3-N-acetylglucosaminyltransferase 1; beta-1,3-N-acetylglucosaminyltransferase bGnT-1; beta-1,3-N-acetylglucosaminyltransferase bGnT-2
B3GNT3	B3GNT3	UDP-GlcNAc:betaGal beta-1,3-N-acetylglucosaminyltransferase 3	N-acetyllactosaminide beta-1,3-N-acetylglucosaminyltransferase 3; UDP-Gal:beta-GlcNAc beta-1,3-galactosyltransferase 8; UDP-galactose:beta-N-acetylglucosamine beta-1,3-galactosyltransferase 8; beta-1,3-GalTase 8; beta-1,3-Gn-T3; beta-1,3-N-acetylglucosaminyltransferase bGnT-3; beta-1,3-galactosyl-O-glycosyl-glycoprotein beta-1,3-N-acetylglucosaminyltransferase; beta-3-Gx-T8; beta3GalT8; core 1 ex…
B3GNT4	B3GNT4	UDP-GlcNAc:betaGal beta-1,3-N-acetylglucosaminyltransferase 4	BGnT-4; N-acetyllactosaminide beta-1,3-N-acetylglucosaminyltransferase 4; beta-1,3-Gn-T4; beta-1,3-N-acetylglucosaminyltransferase 4; beta-1,3-N-acetylglucosaminyltransferase bGn-T4
B3GNT5	B3GNT5	UDP-GlcNAc:betaGal beta-1,3-N-acetylglucosaminyltransferase 5	BGnT-5; UDP-GlcNAc:beta-Gal beta-1,3-N-acetylglucosaminyltransferase 5; beta 1,3 N-acetyglucosaminyltransferase Lc3 synthase; beta-1,3-Gn-T5; beta-1,3-N-acetylglucosaminyltransferase 5; beta-1,3-N-acetylglucosaminyltransferase bGnT-5; lactosylceramide 1,3-N-acetyl-beta-D-glucosaminyltransferase; lactotriaosylceramide synthase; lc(3)Cer synthase; lc3 synthase
B3GNT6	B3GNT6	UDP-GlcNAc:betaGal beta-1,3-N-acetylglucosaminyltransferase 6	acetylgalactosaminyl-O-glycosyl-glycoprotein beta-1,3-N-acetylglucosaminyltransferase; beta-1,3-N-acetylglucosaminyltransferase 6; beta-1,3-N-acetylglucosaminyltransferase protein; core 3 synthase
B3GNT7	B3GNT7	UDP-GlcNAc:betaGal beta-1,3-N-acetylglucosaminyltransferase 7	BGnT-7; UDP-GlcNAc:betaGal beta-1,3-N-acetylglucosaminyltransferase 7; beta 1,3-N-acetylglucosaminyltransferase 7; beta-1,3-Gn-T7; beta3Gn-T7
B3GNT8	B3GNT8	UDP-GlcNAc:betaGal beta-1,3-N-acetylglucosaminyltransferase 8	BGnT-8; UDP-Gal:betaGal beta 1,3-galactosyltransferase polypeptide 7; UDP-GlcNAc:betaGal beta-1,3-N-acetylglucosaminyltransferase 8; beta galactosyltransferase BGALT15; beta-1,3-Gn-T8; beta-1,3-N-acetylglucosaminyltransferase 8; beta1,3-N-acetylglucosaminyltransferase 8
B3GNT9	B3GNT9	UDP-GlcNAc:betaGal beta-1,3-N-acetylglucosaminyltransferase 9	BGnT-9; UDP-GlcNAc:betaGal beta-1,3-N-acetylglucosaminyltransferase 9; beta-1,3-Gn-T9; beta-1,3-N-acetylglucosaminyltransferase 9; beta-1,3-galactosyltransferase-related protein; beta3Gn-T9
B3GNTL1	B3GNTL1 | LOC128966610	UDP-GlcNAc:betaGal beta-1,3-N-acetylglucosaminyltransferase like 1 | UDP-GlcNAc:betaGal beta-1,3-N-acetylglucosaminyltransferase-like protein 1	BGnT-like protein 1; UDP-GlcNAc:betaGal beta-1,3-N-acetylglucosaminyltransferase 8; UDP-GlcNAc:betaGal beta-1,3-N-acetylglucosaminyltransferase-like protein 1; beta-1,3-Gn-T8; beta-1,3-N-acetylglucosaminyltransferase 8; beta1,3-N-acetylglucosaminyltransferase-like protein 1; beta3Gn-T-like protein 1; queuosine-tRNA galactosyltransferase | UDP-GlcNAc:betaGal beta-1,3-N-acetylglucosaminyltransferas…
B4GALNT1	B4GALNT1	beta-1,4-N-acetyl-galactosaminyltransferase 1	GD2 synthase, GM2 synthase; GM2/GD2 synthase; UDP-Gal:betaGlcNAc beta-1,4-N-acetylgalactosaminyltransferase transferase 1; UDP-N-acetyl-alpha-D-galactosamine:(N-acetylneuraminyl)-galactosylglucosylceramide N-acetylgalactosaminyltransferase (GalNAc-T); beta-1,4 N-acetylgalactosaminyltransferase 1; beta-1,4-N-acetyl-galactosaminyl transferase 1; beta1,4GalNAc-T
B4GALNT2	B4GALNT2	beta-1,4-N-acetyl-galactosaminyltransferase 2 (SID blood group)	UDP-GalNAc:Neu5Aca2-3Galb-R b1,4-N-acetylgalactosaminyltransferase; UDP-GalNAc:Neu5Acalpha2-3Galbeta-R beta1,4-N-acetylgalactosaminyltransferase; beta 1,4 N-acetylgalactosaminyltransferase/betal,4 GalNAcT/Sda-GalNAcT; beta-1,4 N-acetylgalactosaminyltransferase 2; beta-1,4-N-acetyl-galactosaminyl transferase 2; beta-4-N-acetylgalactosaminyltransferase; sd(a) beta-1,4-GalNAc transferase; sda beta-1…
B4GALNT3	B4GALNT3	beta-1,4-N-acetyl-galactosaminyltransferase 3	B4GalNAcT3; Beta4GalNAc-T3; N-acetyl-beta-glucosaminyl-glycoprotein 4-beta-N- acetylgalactosaminyltransferase; N-acetyl-beta-glucosaminyl-glycoprotein 4-beta-N-acetylgalactosaminyltransferase 2; NGalNAc-T2; beta-1,4-N-acetyl-galactosaminyl transferase 3; beta-1,4-N-acetylgalactosaminyltransferase 3; beta-1,4-N-acetylgalactosaminyltransferase III; beta4GalNAcT3
B4GALNT4	B4GALNT4	beta-1,4-N-acetyl-galactosaminyltransferase 4	N-acetyl-beta-glucosaminyl-glycoprotein 4-beta-N- acetylgalactosaminyltransferase; N-acetyl-beta-glucosaminyl-glycoprotein 4-beta-N-acetylgalactosaminyltransferase 1; NGalNAc-T1; beta-1,4-N-acetyl-galactosaminyl transferase 4; beta-1,4-N-acetylgalactosaminyltransferase IV; beta1,4-N-acetylgalactosaminyltransferases IV; beta4GalNAc-T4; beta4GalNAcT4; betaGT4
B4GALT1	B4GALT1	beta-1,4-galactosyltransferase 1	N-acetyllactosamine synthase; UDP-Gal:beta-GlcNAc beta-1,4-galactosyltransferase 1; UDP-Gal:betaGlcNAc beta 1,4- galactosyltransferase, polypeptide 1; UDP-galactose:beta-N-acetylglucosamine beta-1,4-galactosyltransferase 1; beta-1,4-GalTase 1; beta-1,4-galactosyltransferase 1; beta-N-acetylglucosaminyl-glycolipid beta-1,4-galactosyltransferase; beta-N-acetylglucosaminylglycopeptide beta-1,4-galac…
B4GALT2	B4GALT2	beta-1,4-galactosyltransferase 2	N-acetyllactosamine synthase; UDP-Gal:beta-GlcNAc beta-1,4-galactosyltransferase 2; UDP-Gal:betaGlcNAc beta 1,4- galactosyltransferase 2; UDP-Gal:betaGlcNAc beta 1,4-galactosyltransferase, polypeptide 2; UDP-galactose:beta-N-acetylglucosamine beta-1,4-galactosyltransferase 2; beta-1,4-GalTase 2; beta-1,4-galactosyltransferase 2; beta-4-GalT2; beta-N-acetylglucosaminyl-glycolipid beta-1,4-galactos…
B4GALT3	B4GALT3	beta-1,4-galactosyltransferase 3	N-acetyllactosamine synthase; UDP-Gal:beta-GlcNAc beta-1,4-galactosyltransferase 3; UDP-Gal:betaGlcNAc beta 1,4- galactosyltransferase, polypeptide 3; UDP-galactose:beta-N-acetylglucosamine beta-1,4-galactosyltransferase 3; b4Gal-T3; beta-1,4-GalTase 3; beta-1,4-galactosyltransferase 3; beta-N-acetylglucosaminyl-glycolipid beta-1,4-galactosyltransferase 3; beta-N-acetylglucosaminylglycopeptide be…
B4GALT4	B4GALT4	beta-1,4-galactosyltransferase 4	N-acetyllactosamine synthase; UDP-Gal:beta-GlcNAc beta-1,4-galactosyltransferase 4; UDP-Gal:betaGlcNAc beta 1,4- galactosyltransferase 4; UDP-Gal:betaGlcNAc beta 1,4- galactosyltransferase, polypeptide 4; UDP-galactose:beta-N-acetylglucosamine beta-1,4-galactosyltransferase 4; beta-1,4-GalTase 4; beta-1,4-galactosyltransferase 4; beta-N-acetylglucosaminyl-glycolipid beta-1,4-galactosyltransferase…
B4GALT5	B4GALT5	beta-1,4-galactosyltransferase 5	UDP-Gal:beta-GlcNAc beta-1,4-galactosyltransferase 5; UDP-Gal:betaGlcNAc beta 1,4-galactosyltransferase, polypeptide 5; UDP-galactose:beta-N-acetylglucosamine beta-1,4-galactosyltransferase 5; beta-1,4-GalT II; beta-1,4-GalT IV; beta-1,4-GalTase 5; beta-1,4-galactosyltransferase 5; beta-1.4-galactosyltransferase V; beta4-GalT IV; glucosylceramide beta-1,4-galactosyltransferase; lacCer synthase; l…
B4GALT6	B4GALT6	beta-1,4-galactosyltransferase 6	UDP-Gal:beta-GlcNAc beta-1,4-galactosyltransferase 6; UDP-Gal:betaGlcNAc beta 1,4- galactosyltransferase, polypeptide 6; UDP-Gal:glucosylceramide beta-1,4-galactosyltransferase; UDP-galactose:beta-N-acetylglucosamine beta-1,4-galactosyltransferase 6; beta-1,4-GalTase 6; beta-1,4-galactosyltransferase 6; beta4GalT-VI; glucosylceramide beta-1,4-galactosyltransferase; lacCer synthase; lactosylcerami…
B4GALT7	B4GALT7	beta-1,4-galactosyltransferase 7	UDP-Gal:beta-GlcNAc beta-1,4-galactosyltransferase 7; UDP-galactose:beta-N-acetylglucosamine beta-1,4-galactosyltransferase 7; UDP-galactose:beta-xylose beta-1,4-galactosyltransferase; beta-1,4-GalTase 7; beta-1,4-galactosyltransferase 7; beta-1,4-galactosyltransferase VII; beta4Gal-T7; beta4GalT-VII; galactosyltransferase I; proteoglycan UDP-galactose:beta-xylose beta1,4-galactosyltransferase I;…
B4GAT1	B4GAT1	beta-1,4-glucuronyltransferase 1	N-acetyllactosaminide beta-1,3-N-acetylglucosaminyltransferase; UDP-GlcNAc:betaGal beta-1,3-N-acetylglucosaminyltransferase 1; UDP-GlcNAc:betaGal beta-1,3-N-acetylglucosaminyltransferase 6; beta-1,3-N-acetylglucosaminyltransferase bGnT-6; beta-1,4-glucuronyltransferase 1; i-beta-1,3-N-acetylglucosaminyltransferase; poly-N-acetyllactosamine extension enzyme
B9D1	B9D1	B9 domain containing 1	B9 domain-containing protein 1; B9 protein domain 1; MKS1-related protein 1; endothelial precursor protein B9
B9D2	B9D2	B9 domain containing 2	B9 domain-containing protein 2; B9 protein domain 2; MKS1-related protein 2; involved in cIlia stability-1
BAALC	BAALC	BAALC binder of MAP3K1 and KLF4	BAALC, MAP3K1 and KLF4 binding; BAALC, MEKK1 and KLF4 binding; brain and acute leukemia cytoplasmic protein; brain and acute leukemia, cytoplasmic
BAAT	BAAT	bile acid-CoA:amino acid N-acyltransferase	bile acid CoA: amino acid N-acyltransferase (glycine N-choloyltransferase); bile acid Coenzyme A: amino acid N-acyltransferase (glycine N-choloyltransferase); bile acid-CoA thioesterase; bile acid-CoA:amino acid N-acyltransferase; choloyl-CoA hydrolase; long-chain fatty-acyl-CoA hydrolase
BABAM1	BABAM1	BRISC and BRCA1 A complex member 1	BRCA1-A complex subunit MERIT40; BRISC and BRCA1-A complex member 1; mediator of RAP80 interactions and targeting subunit of 40 kDa; mediator of Rap80 interactions and targeting 40 kDa; new component of the BRCA1-A complex; new component of the BRCAA1 A complex
BABAM2	BABAM2	BRISC and BRCA1 A complex member 2	BRCA1-A complex subunit BRE; BRCA1/BRCA2-containing complex subunit 45; BRCA1/BRCA2-containing complex, subunit 4; BRISC and BRCA1-A complex member 2; brain and reproductive organ-expressed (TNFRSF1A modulator); brain and reproductive organ-expressed protein
BACE1	BACE1	beta-secretase 1	APP beta-secretase; asp 2; aspartyl protease 2; beta-secretase 1; beta-site APP cleaving enzyme 1; beta-site APP-cleaving enzyme; beta-site amyloid beta A4 precursor protein-cleaving enzyme; memapsin-2; membrane-associated aspartic protease 2; transmembrane aspartic proteinase Asp2
BACE2	BACE2	beta-secretase 2	56 kDa aspartic-like protease; Down syndrome region aspartic protease; SLCO3A1/BACE2 fusion; aspartyl protease 1; beta-secretase 2; beta-site APP-cleaving enzyme 2; beta-site amyloid beta A4 precursor protein-cleaving enzyme 2; memapsin-1; membrane-associated aspartic protease 1; theta-secretase; transmembrane aspartic proteinase Asp1
BACH1	BACH1	BTB domain and CNC homolog 1	BTB and CNC homology 1, basic leucine zipper transcription factor 1; basic region leucine zipper transcriptional regulator BACH1; transcription regulator protein BACH1
BACH2	BACH2	BTB domain and CNC homolog 2	BTB and CNC homolog 2; BTB and CNC homology 1, basic leucine zipper transcription factor 2; transcription regulator protein BACH2
BAD	BAD	BCL2 associated agonist of cell death	BCL-X/BCL-2 binding protein; BCL2-antagonist of cell death protein; BCL2-binding component 6; BCL2-binding protein; bcl-2-binding component 6; bcl-2-like protein 8; bcl-XL/Bcl-2-associated death promoter; bcl2 antagonist of cell death; bcl2-L-8; bcl2-associated agonist of cell death
BAG1	BAG1	BAG cochaperone 1	BAG family molecular chaperone regulator 1; BCL2 associated athanogene 1; BCL2-associated athanogene; Bcl-2 associating athanogene-1 protein; Bcl-2-binding protein; glucocortoid receptor-associated protein RAP46; receptor-associated protein, 46-KD
BAG2	BAG2	BAG cochaperone 2	BAG family molecular chaperone regulator 2; BCL2 associated athanogene 2; bcl-2-associated athanogene 2; dJ417I1.2 (BAG-family molecular chaperone regulator 2)
BAG3	BAG3	BAG cochaperone 3	BAG family molecular chaperone regulator 3; BCL2 associated athanogene 3; BCL2-binding athanogene 3; Bcl-2-binding protein BIS transcript 2; bcl-2-binding protein Bis; docking protein CAIR-1
BAG4	BAG4	BAG cochaperone 4	BAG family molecular chaperone regulator 4; BCL2 associated athanogene 4; bcl-2-associated athanogene 4; silencer of death domains
BAG5	BAG5	BAG cochaperone 5	BAG family molecular chaperone regulator 5; BCL2 associated athanogene 5; bcl-2-associated athanogene 5
BAG6	BAG6	BAG cochaperone 6	BAG family molecular chaperone regulator 6; BCL2 associated athanogene 6; HLA-B-associated transcript 3; large proline-rich protein BAG6; large proline-rich protein BAT3; protein G3; protein Scythe; scythe
BAGE	BAGE	B melanoma antigen	B melanoma antigen 1; antigen MZ2-BA; cancer/testis antigen 2.1; cancer/testis antigen family 2, member 1
BAGE3	BAGE3 | KMT2C | LOC124908444	BAGE family member 3 | lysine methyltransferase 2C | histone-lysine N-methyltransferase 2C-like	B melanoma antigen 3; B melanoma antigen family member 3; cancer/testis antigen 2.3; cancer/testis antigen family 2, member 3 | ALR-like protein; histone-lysine N-methyltransferase 2C; histone-lysine N-methyltransferase MLL3; histone-lysine N-methyltransferase, H3 lysine-4 specific; homologous to ALR protein; lysine (K)-specific methyltransferase 2C; myeloid/lymphoid or mixed-lineage leukemia pro…
BAGE4	BAGE2 | BAGE4 | BAGE5 | LOC124908467	BAGE family member 2 (pseudogene) | BAGE family member 4 | BAGE family member 5 | B melanoma antigen 3-like	CT2.2; cancer/testis antigen family 2, member 2; B melanoma antigen family, member 2,BAGE family member 2 | B melanoma antigen 4; B melanoma antigen family member 4; MLL3 pseudogene; cancer/testis antigen 2.4; cancer/testis antigen family 2, member 4 | B melanoma antigen 5; B melanoma antigen family member 5; cancer/testis antigen 2.5; cancer/testis antigen family 2, member 5 | B melanoma antigen…
BAGE5	BAGE2 | BAGE3 | BAGE4 | BAGE5 | KMT2C | LOC124907387 | LOC124908158 | LOC124908445 | LOC128966781	BAGE family member 2 (pseudogene) | BAGE family member 3 | BAGE family member 4 | BAGE family member 5 | lysine methyltransferase 2C | histone-lysine N-methyltransferase 2C-like | uncharacterized LOC124908158 | histone-lysine N-methyltransferase 2C-like | histone-lysine N-methyltransferase 2C-like	CT2.2; cancer/testis antigen family 2, member 2; B melanoma antigen family, member 2,BAGE family member 2 | B melanoma antigen 3; B melanoma antigen family member 3; cancer/testis antigen 2.3; cancer/testis antigen family 2, member 3 | B melanoma antigen 4; B melanoma antigen family member 4; MLL3 pseudogene; cancer/testis antigen 2.4; cancer/testis antigen family 2, member 4 | B melanoma antigen…
BAHCC1	BAHCC1	BAH domain and coiled-coil containing 1	BAH and coiled-coil domain-containing protein 1; BAH domain-containing protein 2; bromo adjacent homology domain-containing protein 2
BAHD1	BAHD1	bromo adjacent homology domain containing 1	BAH domain-containing protein 1; bromo adjacent homology domain-containing 1 protein
BAIAP2	BAIAP2	BAR/IMD domain containing adaptor protein 2	BAI1 associated protein 2; BAR/IMD domain-containing adapter protein 2; IRS-58; IRSp53/58; WASP and MIM like; brain-specific angiogenesis inhibitor 1-associated protein 2; fas ligand-associated factor 3; insulin receptor substrate of 53 kDa; insulin receptor substrate p53/p58; insulin receptor substrate protein of 53 kDa
BAIAP2L1	BAIAP2L1	BAR/IMD domain containing adaptor protein 2 like 1	BAI1 associated protein 2 like 1; BAI1-associated protein 2-like protein 1; BAR/IMD domain-containing adapter protein 2-like 1; brain-specific angiogenesis inhibitor 1-associated protein 2-like protein 1; insulin receptor tyrosine kinase substrate
BAIAP2L2	BAIAP2L2	BAR/IMD domain containing adaptor protein 2 like 2	BAI1 associated protein 2 like 2; BAI1-associated protein 2-like protein 2; BAR/IMD domain-containing adapter protein 2-like 2; brain-specific angiogenesis inhibitor 1-associated protein 2-like protein 2; pinkbar; planar intestinal- and kidney-specific BAR domain protein
BAIAP3	BAIAP3	BAI1 associated protein 3	BAI-associated protein 3; BAI1-associated protein 3; brain-specific angiogenesis inhibitor I-associated protein 3
BAK1	BAK1	BCL2 antagonist/killer 1	BCL2-like 7 protein; apoptosis regulator BAK; bcl-2 homologous antagonist/killer; bcl-2-like protein 7; bcl2-L-7; pro-apoptotic protein BAK
BAMBI	BAMBI	BMP and activin membrane bound inhibitor	BMP and activin membrane-bound inhibitor homolog; non-metastatic gene A protein; putative transmembrane protein NMA
BANF1	BANF1	barrier to autointegration nuclear assembly factor 1	BAF nuclear assembly factor 1; barrier to autointegration factor 1; barrier-to-autointegration factor; breakpoint cluster region protein 1
BANF2	BANF2	BANF family member 2	barrier to autointegration factor 2; barrier-to-autointegration factor-like protein; testis secretory sperm-binding protein Li 212a
BANK1	BANK1	B cell scaffold protein with ankyrin repeats 1	B-cell scaffold protein with ankyrin repeats
BANP	BANP	BTG3 associated nuclear protein	BEN domain-containing protein 1; protein BANP; scaffold/matrix-associated region-1-binding protein
BAP1	BAP1	BRCA1 associated deubiquitinase 1	BRCA1 associated protein 1; BRCA1 associated protein-1 (ubiquitin carboxy-terminal hydrolase); cerebral protein 6; cerebral protein-13; ubiquitin carboxy-terminal hydrolase L2; ubiquitin carboxyl-terminal hydrolase BAP1
BARD1	BARD1	BRCA1 associated RING domain 1	BRCA1-associated RING domain gene 1; BRCA1-associated RING domain protein 1; RING-type E3 ubiquitin transferase BARD1
BARHL1	BARHL1	BarH like homeobox 1	barH-like 1 homeobox protein
BARHL2	BARHL2	BarH like homeobox 2	barH-like 2 homeobox protein
BARX1	BARX1	BARX homeobox 1	BarH-like homeobox 1; homeobox protein BarH-like 1
BARX2	BARX2	BARX homeobox 2	BarH-like homeobox 2; homeobox protein BarH-like 2
BASP1	BASP1	brain abundant membrane attached signal protein 1	22 kDa neuronal tissue-enriched acidic protein; brain acid soluble protein 1; brain acid-soluble protein 1; neuronal axonal membrane protein NAP-22; neuronal tissue-enriched acidic protein
BATF	BATF	basic leucine zipper ATF-like transcription factor	B-cell-activating transcription factor; SF-HT-activated gene 2 protein; activating transcription factor B; basic leucine zipper transcription factor, ATF-like; basic leucine zipper transcriptional factor ATF-like
BATF2	BATF2	basic leucine zipper ATF-like transcription factor 2	B-ATF-2; basic leucine zipper transcription factor, ATF-like 2; basic leucine zipper transcriptional factor ATF-like 2; suppressor of AP-1 regulated by IFN
BATF3	BATF3	basic leucine zipper ATF-like transcription factor 3	21 kDa small nuclear factor isolated from T-cells; 21-kD small nuclear factor isolated from T cells; B-ATF-3; Jun dimerization protein 1; Jun dimerization protein p21SNFT; basic leucine zipper transcription factor, ATF-like 3; basic leucine zipper transcriptional factor ATF-like 3
BAX	BAX	BCL2 associated X, apoptosis regulator	BCL2 associated X protein; BCL2-associated X protein omega; Baxdelta2(G8)-RFS protein; Baxdelta2G9; Baxdelta2G9omega; Baxdelta2omega; apoptosis regulator BAX; bcl-2-like protein 4; bcl2-L-4
BAZ1A	BAZ1A	bromodomain adjacent to zinc finger domain 1A	ATP-dependent chromatin remodeling protein; ATP-utilizing chromatin assembly and remodeling factor 1; CHRAC subunit ACF1; bromodomain adjacent to zinc finger domain protein 1A; hWALp1; williams syndrome transcription factor-related chromatin-remodeling factor 180
BAZ1B	BAZ1B	bromodomain adjacent to zinc finger domain 1B	hWALp2; transcription factor WSTF; tyrosine-protein kinase BAZ1B; williams syndrome transcription factor; williams-Beuren syndrome chromosomal region 10 protein; williams-Beuren syndrome chromosomal region 9 protein
BAZ2A	BAZ2A	bromodomain adjacent to zinc finger domain 2A	TTF-I interacting peptide 5; TTF-I-interacting protein 5; bromodomain adjacent to zinc finger domain protein 2A; transcription termination factor I-interacting protein 5
BAZ2B	BAZ2B	bromodomain adjacent to zinc finger domain 2B	bromodomain adjacent to zinc finger domain protein 2B
BBC3	BBC3	BCL2 binding component 3	bcl-2-binding component 3; p53 up-regulated modulator of apoptosis; p53-upregulated modulator of apoptosis
BBIP1	BBIP1	BBSome interacting protein 1	BBSome-interacting protein 1; BBSome-interacting protein of 10 kDa; UPF0604 protein
BBLN	BBLN	bublin coiled coil protein	UPF0184 protein C9orf16; bublin coiled-coil protein
BBOF1	BBOF1	basal body orientation factor 1	basal body-orientation factor 1; coiled-coil domain containing 176; coiled-coil domain-containing protein 176
BBOX1	BBOX1	gamma-butyrobetaine hydroxylase 1	butyrobetaine (gamma), 2-oxoglutarate dioxygenase (gamma-butyrobetaine hydroxylase) 1; gamma-butyrobetaine dioxygenase; gamma-butyrobetaine,2-oxoglutarate dioxygenase 1
BBS1	BBS1	Bardet-Biedl syndrome 1	BBS2-like protein 2; BBSome complex member BBS1; bardet-Biedl syndrome 1 protein
BBS10	BBS10	Bardet-Biedl syndrome 10	BBSome complex assembly protein BBS10; bardet-Biedl syndrome 10 protein
BBS12	BBS12	Bardet-Biedl syndrome 12	Bardet-Biedl syndrome 12 protein; chaperonin-containing T-complex member BBS12
BBS2	BBS2	Bardet-Biedl syndrome 2	BBSome complex member BBS2; Bardet-Biedl syndrome 2 protein; bardet-Biedl syndrome 2 protein
BBS4	BBS4	Bardet-Biedl syndrome 4	BBSome complex member BBS4; Bardet-Biedl syndrome 4 protein; bardet-Biedl syndrome 4 protein
BBS5	BBS5	Bardet-Biedl syndrome 5	BBSome complex member BBS5; bardet-Biedl syndrome 5 protein
BBS7	BBS7	Bardet-Biedl syndrome 7	BBS2-like 1; BBSome complex member BBS7; Bardet-Biedl syndrome 7 protein
BBS9	BBS9	Bardet-Biedl syndrome 9	PTH-responsive osteosarcoma B1 protein; bardet-Biedl syndrome 9 protein; parathyroid hormone-responsive B1 gene protein; protein PTHB1
BBX	BBX	BBX high mobility group box domain containing	Ag recognized by Treg cells 1; BBX, HMG-box containing; HMG box transcription factor BBX; HMG box-containing protein 2; bobby sox homolog; x 001 protein
BCAM	BCAM	basal cell adhesion molecule (Lutheran blood group)	Auberger b antigen; B-CAM cell surface glycoprotein; B-cell adhesion molecule; F8/G253 antigen; Lutheran blood group variant LUGA; basal cell adhesion molecule; basal cell adhesion molecule (Lu and Au blood groups)
BCAN	BCAN	brevican	brain-enriched hyaluronan-binding protein; brevican core protein; chondroitin sulfate proteoglycan 7; chondroitin sulfate proteoglycan BEHAB
BCAP29	BCAP29 | DUS4L-BCAP29	B cell receptor associated protein 29 | DUS4L-BCAP29 readthrough	B-cell receptor-associated protein 29; BCR-associated protein 29 | DUS4L-BCAP29 protein
BCAP31	BCAP31	B cell receptor associated protein 31	6C6-AG tumor-associated antigen; B-cell receptor-associated protein 31; BCR-associated protein Bap31; p28 Bap31
BCAR1	BCAR1	BCAR1 scaffold protein, Cas family member	BCAR1, Cas family scaffold protein; BCAR1, Cas family scaffolding protein; Cas scaffolding protein family member 1; Crk-associated substrate p130Cas; breast cancer anti-estrogen resistance protein 1
BCAR3	BCAR3	BCAR3 adaptor protein, NSP family member	BCAR3, NSP family adaptor protein; SH2 domain-containing protein 3B; breast cancer anti-estrogen resistance 3; breast cancer anti-estrogen resistance protein 3; breast cancer antiestrogen resistance 3 protein; dJ1033H22.2 (breast cancer anti-estrogen resistance 3); epididymis secretory sperm binding protein; mig-7; migration inducting gene-7; novel SH2-containing protein 2
BCAS1	BCAS1	brain enriched myelin associated protein 1	amplified and overexpressed in breast cancer; breast carcinoma amplified sequence 1; breast carcinoma-amplified sequence 1; novel amplified in breast cancer 1; protein having mRNA enriched in synaptosomes 2
BCAS2	BCAS2	BCAS2 pre-mRNA processing factor	DNA amplified in mammary carcinoma 1 protein; breast carcinoma amplified sequence 2; pre-mRNA-splicing factor SPF27; spliceosome associated protein, amplified in breast cancer; spliceosome-associated protein SPF 27
BCAS3	BCAS3	BCAS3 microtubule associated cell migration factor	BCAS3 microtubule associated cell migration factor; BCAS4/BCAS3 fusion; Rudhira; breast carcinoma amplified sequence 4/3 fusion protein; breast carcinoma-amplified sequence 3; metastasis associated antigen of breast cancer; phagophore assembly factor 2; protein Maab1
BCAS4	BCAS4	breast carcinoma amplified sequence 4	BCAS4/BCAS3 fusion; breast carcinoma amplified sequence 4/3 fusion protein; breast carcinoma-amplified sequence 4
BCAT1	BCAT1	branched chain amino acid transaminase 1	branched chain amino-acid transaminase 1, cytosolic; branched chain aminotransferase 1, cytosolic; branched-chain-amino-acid aminotransferase, cytosolic; placental protein 18
BCAT2	BCAT2	branched chain amino acid transaminase 2	branched chain amino-acid transaminase 2, mitochondrial; branched chain aminotransferase 2, mitochondrial; branched-chain-amino-acid aminotransferase, mitochondrial; placental protein 18
BCCIP	BCCIP	BRCA2 and CDKN1A interacting protein	BCCIPalpha; BCCIPbeta; BRCA2 and CDKN1A-interacting protein; BRCA2 and Cip1/p21 interacting protein; TOK-1alpha; TOK-1beta; cdk inhibitor p21 binding protein; p21- and CDK-associated protein 1; protein TOK-1
BCDIN3D	BCDIN3D	BCDIN3 domain containing RNA methyltransferase	BCDIN3 domain containing RNA methyltransfease; BCDIN3 domain-containing protein; RNA 5'-monophosphate methyltransferase; pre-miRNA 5'-monophosphate methyltransferase; probable methyltransferase BCDIN3D
BCHE	BCHE	butyrylcholinesterase	acylcholine acylhydrolase; butyrylcholine esterase; choline esterase II; cholinesterase; cholinesterase (serum) 2; cholinesterase 1; pseudocholinesterase
BCKDHA	BCKDHA	branched chain keto acid dehydrogenase E1 subunit alpha	2-oxoisovalerate dehydrogenase (lipoamide); 2-oxoisovalerate dehydrogenase subunit alpha, mitochondrial; BCKDH E1-alpha; branched chain keto acid dehydrogenase E1 alpha protein; branched chain keto acid dehydrogenase E1, alpha polypeptide; branched-chain alpha-keto acid dehydrogenase E1 component alpha chain
BCKDHB	BCKDHB	branched chain keto acid dehydrogenase E1 subunit beta	2-oxoisovalerate dehydrogenase subunit beta, mitochondrial; E1b-beta subunit of the branched-chain complex; branched chain alpha-ketoacid dehydrogenase E1-beta subunit; branched chain keto acid dehydrogenase E1 beta; branched chain keto acid dehydrogenase E1, beta polypeptide; branched-chain alpha-keto acid dehydrogenase E1 component beta chain; testis secretory sperm-binding protein Li 240mP
BCKDK	BCKDK	branched chain keto acid dehydrogenase kinase	BCKD-kinase; BCKDH kinase; BCKDHKIN; [3-methyl-2-oxobutanoate dehydrogenase [lipoamide]] kinase, mitochondrial; branched chain alpha-ketoacid dehydrogenase kinase; branched chain ketoacid dehydrogenase kinase; branched-chain alpha-ketoacid dehydrogenase kinase
BCL10	BCL10	BCL10 immune signaling adaptor	B cell CLL/lymphoma 10; B-cell lymphoma/leukemia 10; CARD containing molecule enhancing NF-kB; CARD-containing apoptotic signaling protein; CARD-containing molecule enhancing NF-kappa-B; CARD-containing proapoptotic protein; CED-3/ICH-1 prodomain homologous E10-like regulator; cCARMEN; caspase-recruiting domain-containing protein; cellular homolog of vCARMEN; cellular-E10; hCLAP; mammalian CARD-c…
BCL11A	BCL11A	BCL11 transcription factor A	B cell CLL/lymphoma 11A; B-cell CLL/lymphoma 11A (zinc finger protein); B-cell lymphoma/leukemia 11A; BAF chromatin remodeling complex subunit BCL11A; BCL11A B-cell CLL/lymphoma 11A (zinc finger protein); BCL11A, BAF complex component; C2H2-type zinc finger protein; COUP-TF-interacting protein 1; ecotropic viral integration site 9 homolog; ecotropic viral integration site 9 protein homolog; zinc …
BCL11B	BCL11B	BCL11 transcription factor B	B cell CLL/lymphoma 11B; B-cell CLL/lymphoma 11B (zinc finger protein); B-cell CLL/lymphoma 11B/T-cell receptor delta constant region fusion protein; B-cell lymphoma/leukaemia 11B; B-cell lymphoma/leukemia 11B; BAF chromatin remodeling complex subunit BCL11B; BCL-11B; BCL11B, BAF complex component; BCL11B/TRDC fusion; COUP-TF-interacting protein 2; hRit1; radiation-induced tumor suppressor gene 1…
BCL2	BCL2	BCL2 apoptosis regulator	B-cell CLL/lymphoma 2; apoptosis regulator Bcl-2; protein phosphatase 1, regulatory subunit 50
BCL2A1	BCL2A1	BCL2 related protein A1	bcl-2-like protein 5; bcl-2-related protein A1; bcl2-L-5; hematopoietic BCL2-related protein A1; hemopoietic-specific early response protein; protein BFL-1
BCL2L1	BCL2L1	BCL2 like 1	apoptosis regulator Bcl-X; bcl-2-like protein 1; protein phosphatase 1, regulatory subunit 52
BCL2L10	BCL2L10	BCL2 like 10	BCL2-like 10 (apoptosis facilitator); anti-apoptotic protein Boo; anti-apoptotic protein NrH; apoptosis regulator Bcl-B; bcl-2-like protein 10; death inducer binding to vBcl-2 and Apaf-1
BCL2L11	BCL2L11	BCL2 like 11	BCL2-like 11 (apoptosis facilitator); bcl-2 interacting mediator of cell death; bcl-2 interacting protein Bim; bcl-2-like protein 11; bcl-2-related ovarian death agonist
BCL2L12	BCL2L12	BCL2 like 12	BCL2-like 12 (proline rich); Bcl-2 related proline-rich protein; bcl-2-like protein 12
BCL2L13	BCL2L13	BCL2 like 13	BCL2-like 13 (apoptosis facilitator); bcl-2-like protein 13
BCL2L14	BCL2L14	BCL2 like 14	BCL2-like 14 (apoptosis facilitator); apoptosis facilitator Bcl-2-like protein 14; apoptosis regulator BCL-G; bcl2-L-14; testicular tissue protein Li 26
BCL2L15	BCL2L15	BCL2 like 15	bcl-2 family kin; bcl-2-like protein 15; bcl2-L-15; pro-apoptotic Bcl-2 protein
BCL2L2	BCL2L2	BCL2 like 2	apoptosis regulator BCL-W; bcl-2-like protein 2; protein phosphatase 1, regulatory subunit 51
BCL3	BCL3	BCL3 transcription coactivator	B cell CLL/lymphoma 3; B-cell leukemia/lymphoma 3; B-cell lymphoma 3 protein; B-cell lymphoma 3-encoded protein; BCL-3; chronic lymphatic leukemia protein; proto-oncogene BCL3
BCL6	BCL6	BCL6 transcription repressor	B cell CLL/lymphoma 6; B-cell lymphoma 5 protein; B-cell lymphoma 6 protein; B-cell lymphoma 6 protein transcript; BCL-5; BCL-6; cys-his2 zinc finger transcription factor; lymphoma-associated zinc finger gene on chromosome 3; protein LAZ-3; zinc finger and BTB domain-containing protein 27; zinc finger protein 51; zinc finger transcription factor BCL6S
BCL6B	BCL6B	BCL6B transcription repressor	B cell CLL/lymphoma 6B; B-cell CLL/lymphoma 6 member B protein; B-cell CLL/lymphoma 6, member B (zinc finger protein); bcl6-associated zinc finger protein; zinc finger protein 62
BCL7A	BCL7A	BAF chromatin remodeling complex subunit BCL7A	B-cell CLL/lymphoma 7 protein family member A; B-cell CLL/lymphoma 7A; B-cell CLL/lymphoma-7; BCL tumor suppressor 7A; BCL7A, BAF complex component
BCL7B	BCL7B	BAF chromatin remodeling complex subunit BCL7B	B-cell CLL/lymphoma 7 protein family member B; B-cell CLL/lymphoma 7B; BCL tumor suppressor 7B; BCL7B, BAF complex component
BCL7C	BCL7C	BAF chromatin remodeling complex subunit BCL7C	B-cell CLL/lymphoma 7 protein family member C; B-cell CLL/lymphoma 7C; BCL tumor suppressor 7C; BCL7C, BAF complex component
BCL9	BCL9	BCL9 transcription coactivator	B cell CLL/lymphoma 9; B-cell CLL/lymphoma 9 protein; B-cell lymphoma 9 protein; bcl-9; protein legless homolog
BCL9L	BCL9L	BCL9 like	B cell CLL/lymphoma 9 like; B-cell CLL/lymphoma 9-like protein; B-cell lymphoma 9-like protein; BCL9-like protein; nuclear co-factor of beta-catenin signalling; protein BCL9-2
BCLAF1	BCLAF1	BCL2 associated transcription factor 1	BCLAF1 and THRAP3 family member 1; bcl-2-associated transcription factor 1
BCLAF3	BCLAF3	BCLAF1 and THRAP3 family member 3	BCLAF1 and THRAP3 family member 3; uncharacterized protein CXorf23
BCO1	BCO1	beta-carotene oxygenase 1	beta,beta-carotene 15,15'-dioxygenase; beta,beta-carotene 15,15'-monooxygenase; beta-carotene 15, 15'-dioxygenase 1; beta-carotene 15,15'-monooxygenase 1; beta-carotene dioxygenase 1
BCO2	BCO2	beta-carotene oxygenase 2	b,b-carotene-9',10'-dioxygenase; beta,beta-carotene 9',10'-oxygenase; beta-carotene 9',10' oxygenase; beta-carotene dioxygenase 2; carotenoid-9',10'-cleaving dioxygenase; carotenoid-cleaving dioxygenase, mitochondrial
BCOR	BCOR	BCL6 corepressor	BCL-6 coreceptor; BCL-6 corepressor; BCL-6 interacting corepressor; BCL6 interacting corepressor
BCORL1	BCORL1	BCL6 corepressor like 1	BCL-6 corepressor-like protein 1; BCoR-like protein 1
BCR	BCR	BCR activator of RhoGEF and GTPase	BCR, RhoGEF and GTPase activating protein; BCR/FGFR1 chimera protein; FGFR1/BCR chimera protein; breakpoint cluster region; breakpoint cluster region protein; renal carcinoma antigen NY-REN-26
BCS1L	BCS1L	BCS1 homolog, ubiquinol-cytochrome c reductase complex chaperone	BC1 (ubiquinol-cytochrome c reductase) synthesis-like; BCS1-like protein; mitochondrial chaperone BCS1; mitochondrial complex III assembly
BDH1	BDH1	3-hydroxybutyrate dehydrogenase 1	(R)-3-hydroxybutyrate dehydrogenase; 3-hydroxybutyrate dehydrogenase (heart, mitochondrial); 3-hydroxybutyrate dehydrogenase, type 1; D-beta-hydroxybutyrate dehydrogenase, mitochondrial; epididymis secretory sperm binding protein; short chain dehydrogenase/reductase family 9C member 1
BDH2	BDH2	3-hydroxybutyrate dehydrogenase 2	(R)-beta-hydroxybutyrate dehydrogenase; 3-hydroxybutyrate dehydrogenase, type 2; 4-oxo-L-proline reductase; R-beta-hydroxybutyrate dehydrogenase; dehydrogenase/reductase SDR family member 6; oxidoreductase UCPA; short chain dehydrogenase/reductase family 15C member 1
BDKRB1	BDKRB1	bradykinin receptor B1	B1 bradykinin receptor; BK-1 receptor; bradykinin B1 receptor; bradykinin receptor 1
BDKRB2	BDKRB2	bradykinin receptor B2	B2 bradykinin receptor; BK-2 receptor
BDNF	BDNF	brain derived neurotrophic factor	abrineurin; neurotrophic factor BDNF precursor form; neurotrophin; proBDNF
BDP1	BDP1	BDP1 general transcription factor IIIB subunit	B double prime 1, subunit of RNA polymerase III transcription initiation factor IIIB; RNA polymerase III transcription initiation factor B''; TATA box binding protein (TBP)-associated factor, RNA polymerase III, GTF3B subunit 1; transcription factor IIIB 150; transcription factor TFIIIB component B'' homolog; transcription factor-like nuclear regulator
BEAN1	BEAN1	brain expressed associated with NEDD4 1	brain-expressed protein associating with Nedd4 homolog; protein BEAN1
BECN1	BECN1	beclin 1	ATG6 autophagy related 6 homolog; beclin 1 (coiled-coil, moesin-like BCL2-interacting protein); beclin 1, autophagy related; beclin-1; beclin1-beta; beclin1-gamma; coiled-coil myosin-like BCL2-interacting protein; testis secretory sperm-binding protein Li 215e
BECN2	BECN2	beclin 2	Beclin-1-like protein 1; beclin-1 autophagy-related pseudogene 1; beclin-2
BEGAIN	BEGAIN	brain enriched guanylate kinase associated	brain-enriched guanylate kinase-associated homolog; brain-enriched guanylate kinase-associated protein
BEND2	BEND2	BEN domain containing 2	BEN domain-containing protein 2
BEND3	BEND3	BEN domain containing 3	BANP, E5R, and Nac1 (BEN) domain 3; BEN domain-containing protein 3
BEND4	BEND4	BEN domain containing 4	BEN domain-containing protein 4; coiled-coil domain containing 4; coiled-coil domain-containing protein 4
BEND5	BEND5	BEN domain containing 5	BEN domain-containing protein 5
BEND6	BEND6	BEN domain containing 6	BEN domain-containing protein 6
BEND7	BEND7	BEN domain containing 7	BEN domain-containing protein 7
BEST1	BEST1	bestrophin 1	Best disease; bestrophin-1; vitelliform macular dystrophy protein 2
BEST2	BEST2	bestrophin 2	VMD2-like gene 1; bestrophin-2a; vitelliform macular dystrophy 2-like 1; vitelliform macular dystrophy 2-like protein 1
BEST3	BEST3	bestrophin 3	bestrophin-3; vitelliform macular dystrophy 2-like 3; vitelliform macular dystrophy 2-like protein 3
BEST4	BEST4	bestrophin 4	bestrophin-4; vitelliform macular dystrophy 2-like 2; vitelliform macular dystrophy 2-like protein 2
BET1	BET1	Bet1 golgi vesicular membrane trafficking protein	BET1 homolog; Bet1p homolog; Golgi vesicular membrane trafficking protein p18; blocked early in transport 1 homolog; golgi vesicular membrane-trafficking protein p18
BET1L	BET1L	Bet1 golgi vesicular membrane trafficking protein like	BET1-like protein; GOS-15; blocked early in transport 1 homolog-like; golgi SNARE 15 kDa protein; golgi SNARE with a size of 15 kDa; golgi integral membrane protein 3; vesicle transport protein GOS15
BEX1	BEX1	brain expressed X-linked 1	brain-expressed X-linked protein 1; ovarian granulosa cell 13.0 kDa protein hGR74; protein BEX1
BEX2	BEX2	brain expressed X-linked 2	brain-expressed X-linked protein 2; hBex2; protein BEX2
BEX3	BEX3	brain expressed X-linked 3	brain-expressed X-linked protein 3; nerve growth factor receptor (TNFRSF16) associated protein 1; ovarian granulosa cell 13.0 kDa protein HGR74; p75NTR-associated cell death executor; protein BEX3
BEX4	BEX4	brain expressed X-linked 4	BEX family member 4; BEX1-like protein 1; brain expressed X-linked-like 1; nerve growth factor receptor-associated protein 3; protein BEX4
BEX5	BEX5	brain expressed X-linked 5	BEX family member 5; NGFRAP1-like 1; NGFRAP1-like protein 1; brain-expressed X-linked protein 5; nerve growth factor receptor-associated protein 2; protein BEX5
BFAR	BFAR	bifunctional apoptosis regulator	RING finger protein 47; bifunctional apoptosis inhibitor; bifunctional apoptosis regulator
BFSP1	BFSP1	beaded filament structural protein 1	beaded filament structural protein 1, filensin; cytoskeletal protein, 115 KD; filensin; lens fiber cell beaded-filament structural protein CP 115; lens intermediate filament-like heavy
BFSP2	BFSP2	beaded filament structural protein 2	49 kDa cytoskeletal protein; beaded filament protein CP49; beaded filament structural protein 2, phakinin; bfps2, Cytoskeletal protein, 49-kD; lens fiber cell beaded filament protein CP 47; lens fiber cell beaded filament protein CP 49; lens intermediate filament-like light; phakinin
BGLAP	BGLAP	bone gamma-carboxyglutamate protein	bone gamma-carboxyglutamate (gla) protein (osteocalcin); gamma-carboxyglutamic acid-containing protein; osteocalcin
BGN	BGN	biglycan	biglycan; bone/cartilage proteoglycan-I; dermatan sulphate proteoglycan I; small leucine-rich protein 1A
BHLHA15	BHLHA15	basic helix-loop-helix family member a15	MIST-1; basic helix-loop-helix domain containing, class B, 8; class A basic helix-loop-helix protein 15; class B basic helix-loop-helix protein 8; class II bHLH protein MIST1; muscle, intestine and stomach expression 1
BHLHA9	BHLHA9	basic helix-loop-helix family member a9	Fingerin; class A basic helix-loop-helix protein 9; class F basic helix-loop-helix factor 42; class II basic helix-loop-helix protein
BHLHE22	BHLHE22	basic helix-loop-helix family member e22	basic helix-loop-helix domain containing, class B, 5; class B basic helix-loop-helix protein 5; class E basic helix-loop-helix protein 22; trinucleotide repeat containing 20
BHLHE23	BHLHE23	basic helix-loop-helix family member e23	basic helix-loop-helix domain containing, class B, 4; class B basic helix-loop-helix protein 4; class E basic helix-loop-helix protein 23
BHLHE40	BHLHE40	basic helix-loop-helix family member e40	basic helix-loop-helix domain containing, class B, 2; class B basic helix-loop-helix protein 2; class E basic helix-loop-helix protein 40; differentially expressed in chondrocytes 1; differentially expressed in chondrocytes protein 1; differentiated embryo chondrocyte expressed gene 1; enhancer-of-split and hairy-related protein 2; stimulated by retinoic acid gene 13 protein
BHLHE41	BHLHE41	basic helix-loop-helix family member e41	basic helix-loop-helix domain containing, class B, 3; class E basic helix-loop-helix protein 41; differentially expressed in chondrocytes protein 2; enhancer-of-split and hairy-related protein 1
BHMT	BHMT	betaine--homocysteine S-methyltransferase	betaine--homocysteine S-methyltransferase 1; epididymis secretory sperm binding protein Li 61p
BHMT2	BHMT2	betaine--homocysteine S-methyltransferase 2	S-methylmethionine--homocysteine S-methyltransferase BHMT2; SMM-hcy methyltransferase; betaine-homocysteine methyltransferase 2
BICC1	BICC1	BicC family RNA binding protein 1	FGFR2-BICC1 fusion kinase protein; bicaudal C homolog 1; protein bicaudal C homolog 1
BICD1	BICD1	BICD cargo adaptor 1	bicaudal D homolog 1; cytoskeleton-like bicaudal D protein homolog 1; protein bicaudal D homolog 1
BICD2	BICD2	BICD cargo adaptor 2	bic-D 2; bicaudal D homolog 2; coiled-coil protein BICD2; cytoskeleton-like bicaudal D protein homolog 2; homolog of Drosophila bicaudal D; protein bicaudal D homolog 2
BICDL1	BICDL1	BICD family like cargo adaptor 1	BICD family-like cargo adapter 1; BICD-related protein 1; bicaudal D-related protein 1; coiled-coil domain containing 64; coiled-coil domain-containing protein 64A
BICDL2	BICDL2	BICD family like cargo adaptor 2	BICD family-like cargo adapter 2; BICD-related protein 2; bicaudal D-related protein 2; coiled-coil domain containing 64B; coiled-coil domain-containing protein 64B
BICRA	BICRA	BRD4 interacting chromatin remodeling complex associated protein	BRD4 interacting chromatin remodelling complex associated protein; BRD4-interacting chromatin-remodeling complex-associated protein; glioma tumor suppressor candidate region gene 1 protein
BICRAL	BICRAL	BICRA like chromatin remodeling complex associated protein	BRD4 interacting chromatin remodeling complex associated protein like; BRD4 interacting chromatin remodelling complex associated protein like; BRD4-interacting chromatin-remodeling complex-associated protein-like; GLTSCR1 like; glioma tumor suppressor candidate region gene 1 protein-like
BID	BID	BH3 interacting domain death agonist	BH3-interacting domain death agonist; Human BID coding sequence; apoptic death agonist; desmocollin type 4; p22 BID
BIK	BIK	BCL2 interacting killer	BCL2-interacting killer (apoptosis-inducing); apoptosis inducer NBK; apoptosis-inducing NBK; bcl-2-interacting killer; natural born killer
BIN1	BIN1	bridging integrator 1	amphiphysin 2; amphiphysin II; amphiphysin-like protein; box dependant MYC interacting protein 1; box-dependent myc-interacting protein 1; myc box-dependent-interacting protein 1
BIN2	BIN2	bridging integrator 2	breast cancer associated protein BRAP1; breast cancer-associated protein 1; bridging integrator 2
BIN3	BIN3	bridging integrator 3	bridging integrator 3
BIRC2	BIRC2	baculoviral IAP repeat containing 2	IAP homolog B; IAP-2; NFR2-TRAF signalling complex protein; RING finger protein 48; RING-type E3 ubiquitin transferase BIRC2; TNFR2-TRAF-signaling complex protein 2; apoptosis inhibitor 1; baculoviral IAP repeat-containing protein 2; cellular inhibitor of apoptosis 1; inhibitor of apoptosis protein 2
BIRC3	BIRC3	baculoviral IAP repeat containing 3	IAP homolog C; RING finger protein 49; RING-type E3 ubiquitin transferase BIRC3; TNFR2-TRAF signaling complex protein; TNFR2-TRAF-signaling complex protein 1; apoptosis inhibitor 2; baculoviral IAP repeat-containing protein 3; cellular inhibitor of apoptosis 2; inhibitor of apoptosis protein 1; mammalian IAP homolog C
BIRC5	BIRC5	baculoviral IAP repeat containing 5	apoptosis inhibitor 4; apoptosis inhibitor survivin; baculoviral IAP repeat-containing protein 5
BIRC6	BIRC6	baculoviral IAP repeat containing 6	BIR repeat-containing ubiquitin-conjugating enzyme; RING-type E3 ubiquitin transferase BIRC6; baculoviral IAP repeat-containing protein 6; dual E2 ubiquitin-conjugating enzyme/E3 ubiquitin-protein ligase BIRC6; ubiquitin-conjugating BIR-domain enzyme apollon
BIRC7	BIRC7	baculoviral IAP repeat containing 7	RING finger protein 50; RING-type E3 ubiquitin transferase BIRC7; baculoviral IAP repeat-containing protein 7; kidney inhibitor of apoptosis protein; livin inhibitor of apoptosis; melanoma inhibitor of apoptosis protein
BIRC8	BIRC8	baculoviral IAP repeat containing 8	IAP-like protein 2; baculoviral IAP repeat-containing protein 8; inhibitor of apoptosis-like protein 2; testis-specific inhibitor of apoptosis
BIVM	BIVM	basic, immunoglobulin-like variable motif containing	basic immunoglobulin-like variable motif-containing protein
BLACAT1	BLACAT1	BLACAT1 overlapping LEMD1 locus	bladder cancer associated transcript 1; bladder cancer associated transcript 1 (non-protein coding); long intergenic non-protein coding RNA 912; long intergenic noncoding RNA up-regulated in bladder cancer
BLCAP	BLCAP	BLCAP apoptosis inducing factor	apoptosis inducing factor BLCAP; bladder cancer associated protein; bladder cancer related protein (10kD)
BLID	BLID	BH3-like motif containing, cell death inducer	BH3-like motif-containing cell death inducer; breast cancer cell 2; breast cancer cell protein 2
BLK	BLK	BLK proto-oncogene, Src family tyrosine kinase	B lymphoid tyrosine kinase; BLK nonreceptor tyrosine kinase; b lymphocyte kinase; p55-Blk; tyrosine-protein kinase Blk
BLM	BLM	BLM RecQ like helicase	Bloom syndrome RecQ like helicase; Bloom syndrome, RecQ helicase-like; DNA 3'-5' helicase BLM; DNA helicase, RecQ-like type 2; bloom syndrome protein; recQ protein-like 3; recQ-like DNA helicase BLM
BLMH	BLMH	bleomycin hydrolase	BLM hydrolase; bleomycin hydrolase
BLNK	BLNK	B cell linker	B cell adaptor containing SH2 domain; B-cell activation; B-cell adapter containing a SH2 domain protein; B-cell adapter containing a Src homology 2 domain protein; B-cell linker protein; Src homology 2 domain-containing leukocyte protein of 65 kDa; Src homology [SH2] domain-containing leukocyte protein of 65 kD; cytoplasmic adapter protein
BLOC1S1	BLOC1S1	biogenesis of lysosomal organelles complex 1 subunit 1	BLOC-1 subunit 1; GCN5 (general control of amino-acid synthesis, yeast, homolog)-like 1; GCN5 general control of amino-acid synthesis 5-like 1; GCN5-like protein 1; MTA1-interacting coactivator; biogenesis of lysosome-related organelles complex 1 subunit 1
BLOC1S2	BLOC1S2	biogenesis of lysosomal organelles complex 1 subunit 2	11 kDa centrosome associated protein; BLOC-1 subunit 2; biogenesis of lysosome-related organelles complex 1 subunit 2; centrosomal 10 kDa protein; centrosome protein oncogene
BLOC1S3	BLOC1S3	biogenesis of lysosomal organelles complex 1 subunit 3	BLOC-1 subunit 3; biogenesis of lysosome-related organelles complex 1 subunit 3; biogenesis of lysosome-related organelles complex-1, subunit 3; reduced pigmentation, mouse, homolog of
BLOC1S4	BLOC1S4	biogenesis of lysosomal organelles complex 1 subunit 4	BLOC-1 subunit 4; biogenesis of lysosomal organelles complex-1, subunit 4, cappuccino; biogenesis of lysosome-related organelles complex 1 subunit 4; cappuccino homolog; protein cappuccino homolog
BLOC1S5	BLOC1S5 | EEF1E1-BLOC1S5	biogenesis of lysosomal organelles complex 1 subunit 5 | EEF1E1-BLOC1S5 readthrough (NMD candidate)	BLOC-1 subunit 5; biogenesis of lysosomal organelles complex-1, subunit 5, muted; biogenesis of lysosome-related organelles complex 1 subunit 5; muted homolog; protein Muted homolog |
BLOC1S6	BLOC1S6	biogenesis of lysosomal organelles complex 1 subunit 6	BLOC-1 subunit 6; BLOC-1 subunit pallidin; biogenesis of lysosomal organelles complex-1, subunit 5, pallidin; biogenesis of lysosomal organelles complex-1, subunit 6, pallidin; biogenesis of lysosome-related organelles complex 1 subunit 6; pallid protein homolog; syntaxin 13 binding protein 1; syntaxin 13-interacting protein pallid
BLTP1	BLTP1	bridge-like lipid transfer protein family member 1	bridge-like lipid transfer protein family member 1; fragile site-associated protein
BLTP2	BLTP2	bridge-like lipid transfer protein family member 2	U937-associated antigen; antigen MLAA-22; breast cancer overexpressed gene 1; breast cancer-overexpressed gene 1 protein; bridge-like lipid transfer protein family member 2; cancer/testis antigen 101; protein hobbit homolog
BLTP3A	BLTP3A	bridge-like lipid transfer protein family member 3A	ICBP90 binding protein 1; UHRF1 (ICBP90) binding protein 1; UHRF1 binding protein 1; bridge-like lipid transfer protein family member 3A; ubiquitin-like containing PHD and RING finger domains 1-binding protein 1
BLTP3B	BLTP3B	bridge-like lipid transfer protein family member 3B	UHRF1 (ICBP90) binding protein 1-like; UHRF1 binding protein 1 like; bridge-like lipid transfer protein family member 3B; syntaxin 6Habc-interacting protein of 164 kDa; syntaxin-6 Habc-interacting protein of 164 kDa
BLVRA	BLVRA	biliverdin reductase A	BVR A; biliverdin reductase A; biliverdin reductase IXalpha; biliverdin-IX alpha-reductase; testis tissue sperm-binding protein Li 61n
BLVRB	BLVRB	biliverdin reductase B	BVR-B; FR; GHBP; NADPH-dependent diaphorase; NADPH-flavin reductase; S-nitroso-CoA-assisted nitrosyltransferase; SNO-CoA-assisted nitrosyltransferase; biliverdin-IX beta-reductase; epididymis secretory protein Li 10; flavin reductase (NADPH); green heme-binding protein; short chain dehydrogenase/reductase family 43U, member 1
BLZF1	BLZF1	basic leucine zipper nuclear factor 1	JEM-1short protein; cytoplasmic protein; golgin-45; leucine zipper nuclear factor; p45 basic leucine-zipper nuclear factor
BMAL1	BMAL1	basic helix-loop-helix ARNT like 1	ARNT-like protein 1, brain and muscle; PAS domain containing 3; PAS domain-containing protein 3; aryl hydrocarbon receptor nuclear translocator like; aryl hydrocarbon receptor nuclear translocator-like protein 1; bHLH-PAS protein JAP3; basic helix-loop-helix ARNT-like protein 1; basic helix-loop-helix family member e5; basic-helix-loop-helix-PAS orphan MOP3; basic-helix-loop-helix-PAS protein MOP…
BMAL2	BMAL2	basic helix-loop-helix ARNT like 2	CYCLE-like factor; PAS domain-containing protein 9; aryl hydrocarbon receptor nuclear translocator like 2; basic helix-loop-helix ARNT-like protein 2; basic-helix-loop-helix-PAS protein MOP9; brain and muscle ARNT-like 2; class E basic helix-loop-helix protein 6; member of PAS protein 9; member of PAS superfamily 9; transcription factor BMAL2
BMERB1	BMERB1 | MPV17L-BMERB1	bMERB domain containing 1 | MPV17L-BMERB1 readthrough	bMERB domain-containing protein 1; migration inhibitory protein; uncharacterized protein C16orf45 | MPV17L-BMERB1 readthrough protein
BMF	BMF	Bcl2 modifying factor	bcl-2-modifying factor
BMI1	BMI1	BMI1 proto-oncogene, polycomb ring finger	B lymphoma Mo-MLV insertion region 1 homolog; BMI1 polycomb ring finger oncogene; BMI1 polycomb ring finger proto-oncogene; murine leukemia viral (bmi-1) oncogene homolog; polycomb complex protein BMI-1; polycomb group RING finger protein 4; polycomb group protein Bmi1; ring finger protein 51
BMP1	BMP1	bone morphogenetic protein 1	bone morphogenetic protein 1; mammalian tolloid protein; procollagen C-endopeptidase; procollagen C-proteinase 3; tolloid-like
BMP10	BMP10	bone morphogenetic protein 10	bone morphogenetic protein 10
BMP15	BMP15	bone morphogenetic protein 15	bone morphogenetic protein 15; growth/differentiation factor 9B
BMP2	BMP2	bone morphogenetic protein 2	bone morphogenetic protein 2; bone morphogenetic protein 2A
BMP2K	BMP2K	BMP2 inducible kinase	BMP-2-inducible protein kinase
BMP3	BMP3	bone morphogenetic protein 3	bone morphogenetic protein 3; bone morphogenetic protein 3 (osteogenic); bone morphogenetic protein 3A; osteogenin
BMP4	BMP4	bone morphogenetic protein 4	bone morphogenetic protein 2B; bone morphogenetic protein 4
BMP5	BMP5	bone morphogenetic protein 5	bone morphogenetic protein 5
BMP6	BMP6	bone morphogenetic protein 6	VG-1-R; VG-1-related protein; bone morphogenetic protein 6; vegetal related growth factor (TGFB-related)
BMP7	BMP7	bone morphogenetic protein 7	bone morphogenetic protein 7; osteogenic protein 1
BMP8A	BMP8A	bone morphogenetic protein 8a	BMP-8A; bone morphogenetic protein 8A
BMP8B	BMP8B	bone morphogenetic protein 8b	bone morphogenetic protein 8 (osteogenic protein 2); bone morphogenetic protein 8B; osteogenic protein 2
BMPER	BMPER	BMP binding endothelial regulator	BMP-binding endothelial regulator precursor protein; BMP-binding endothelial regulator protein; bone morphogenetic protein-binding endothelial cell precursor-derived regulator; crossveinless 2
BMPR1A	BMPR1A	bone morphogenetic protein receptor type 1A	BMP type-1A receptor; activin A receptor, type II-like kinase 3; activin receptor-like kinase 3; bone morphogenetic protein receptor type-1A; bone morphogenetic protein receptor, type IA; serine/threonine-protein kinase receptor R5
BMPR1B	BMPR1B	bone morphogenetic protein receptor type 1B	BMP type-1B receptor; BMPR-1B; activin receptor-like kinase 6; bone morphogenetic protein receptor type-1B; bone morphogenetic protein receptor, type IB; serine/threonine receptor kinase
BMPR2	BMPR2	bone morphogenetic protein receptor type 2	BMP type II receptor; BMP type-2 receptor; bone morphogenetic protein receptor type II; bone morphogenetic protein receptor type-2; bone morphogenetic protein receptor, type II (serine/threonine kinase); type II activin receptor-like kinase; type II receptor for bone morphogenetic protein-4
BMS1	BMS1	BMS1 ribosome biogenesis factor	BMS1 homolog, ribosome assembly protein; BMS1-like, ribosome assembly protein; ribosome assembly protein BMS1 homolog; ribosome biogenesis protein BMS1 homolog
BMT2	BMT2
BMX	BMX	BMX non-receptor tyrosine kinase	BTK-like on X chromosome; Etk/Bmx cytosolic tyrosine kinase; NTK38 tyrosine kinase; bone marrow tyrosine kinase gene in chromosome X protein; cytoplasmic tyrosine-protein kinase BMX; epithelial and endothelial tyrosine kinase
BNC1	BNC1	basonuclin zinc finger protein 1	basonuclin 1; zinc finger protein basonuclin-1
BNC2	BNC2	basonuclin zinc finger protein 2	basonuclin 2; zinc finger protein basonuclin-2
BNIP1	BNIP1	BCL2 interacting protein 1	BCL2/adenovirus E1B 19 kDa protein-interacting protein 1; BCL2/adenovirus E1B 19kDa interacting protein 1; transformation-related gene 8 protein; vesicle transport protein SEC20
BNIP2	BNIP2	BCL2 interacting protein 2	BCL2/adenovirus E1B 19 kDa protein-interacting protein 2; BCL2/adenovirus E1B 19kDa interacting protein 2
BNIP3	BNIP3	BCL2 interacting protein 3	BCL2/adenovirus E1B 19 kDa protein-interacting protein 3; BCL2/adenovirus E1B 19kDa interacting protein 3; BCL2/adenovirus E1B interacting protein 3; Hypoxia-Activated BNIP3 Overlapping Non-coding RNA; nineteen kD interacting protein-3
BNIP3L	BNIP3L	BCL2 interacting protein 3 like	BCL2/adenovirus E1B 19 kDa protein-interacting protein 3-like; BCL2/adenovirus E1B 19 kDa protein-interacting protein 3A; BCL2/adenovirus E1B 19-kd protein-interacting protein 3a; BCL2/adenovirus E1B 19kDa interacting protein 3 like; NIP-3-like protein X; NIP3-like protein X; adenovirus E1B19k-binding protein B5
BNIP5	BNIP5	BCL2 interacting protein 5	protein BNIP5; uncharacterized protein C6orf222
BNIPL	BNIPL	BCL2 interacting protein like	BCL2/adenovirus E1B 19kD interacting protein like; BNIP-2 similar; bcl-2/adenovirus E1B 19 kDa-interacting protein 2-like protein
BOC	BOC	BOC cell adhesion associated, oncogene regulated	Boc homolog; brother of CDO; brother of CDON; cell adhesion associated, oncogene regulated 2
BOD1	BOD1	biorientation of chromosomes in cell division 1	biorientation defective 1; biorientation of chromosomes in cell division protein 1; family with sequence similarity 44, member B
BOD1L1	BOD1L1	biorientation of chromosomes in cell division 1 like 1	biorientation of chromosomes in cell division 1-like; biorientation of chromosomes in cell division protein 1-like 1; family with sequence similarity 44, member A
BOD1L2	BOD1L2	biorientation of chromosomes in cell division 1 like 2	biorientation of chromosomes in cell division 1 pseudogene; biorientation of chromosomes in cell division protein 1 pseudogene; biorientation of chromosomes in cell division protein 1-like 2; family with sequence similarity 44, member C; putative biorientation of chromosomes in cell division protein 1 pseudogene; putative biorientation of chromosomes in cell division protein 1-like 2; putative pr…
BOK	BOK	BCL2 family apoptosis regulator BOK	BCL2 related ovarian killer; BOK, BCL2 family apoptosis regulator; bcl-2-like protein 9; bcl-2-related ovarian killer protein; bcl2-L-9; hBOK
BOLA1	BOLA1	bolA family member 1	bolA homolog 1; bolA-like 1; bolA-like protein 1
BOLA2B	BOLA2 | BOLA2-SMG1P6 | BOLA2B | LOC124907841	bolA family member 2 | BOLA2-SMG1P6 readthrough | bolA family member 2B | bolA-like protein 2	BolA-like protein 2 member A; bolA homolog 2; bolA-like protein 2 | BOLA2-SMG1P6 protein; BOLA2-SMG1P6 readthrough protein | BolA-like protein 2 member B; bolA homolog 2B; bolA-like protein 2; bolA-like protein 2B | bolA-like protein 2
BOLA3	BOLA3	bolA family member 3	bolA homolog 3; bolA-like protein 3
BOLL	BOLL	boule homolog, RNA binding protein	bol, boule-like; boule-like RNA binding protein; boule-like protein; protein boule-like
BOP1	BOP1	BOP1 ribosomal biogenesis factor	block of proliferation 1; ribosome biogenesis protein BOP1
BORA	BORA	BORA aurora kinase A activator	protein aurora borealis
BORCS5	BORCS5	BLOC-1 related complex subunit 5	BLOC-1-related complex subunit 5; loss of heterozygosity 12 chromosomal region 1 protein; loss of heterozygosity, 12, chromosomal region 1; myristoylated lysosomal protein; myrlysin
BORCS6	BORCS6	BLOC-1 related complex subunit 6	BLOC-1-related complex subunit 6; lysosome-dispersing protein; lyspersin
BORCS7	BORCS7	BLOC-1 related complex subunit 7	BLOC-1-related complex subunit 7; UPF0693 protein C10orf32; diaskedin
BORCS8	BORCS8 | BORCS8-MEF2B	BLOC-1 related complex subunit 8 |	BLOC-1-related complex subunit 8; MEF2B neighbor gene protein; protein MEF2BNB |
BPGM	BPGM	bisphosphoglycerate mutase	2,3-bisphosphoglycerate mutase, erythrocyte; 2,3-bisphosphoglycerate synthase; 2,3-diphosphoglycerate mutase; BPG-dependent PGAM; bisphosphoglycerate mutase; erythrocyte 2,3-bisphosphoglycerate mutase; testis secretory sperm-binding protein Li 202a
BPHL	BPHL	biphenyl hydrolase like	biphenyl hydrolase-like (serine hydrolase); biphenyl hydrolase-related protein; breast epithelial mucin-associated antigen; valacyclovir hydrolase; valacyclovirase
BPI	BPI	bactericidal permeability increasing protein	BPI fold containing family D, member 1; CAP 57; bactericidal permeability-increasing protein; recombinant BPI holoprotein, rBPI
BPIFA1	BPIFA1	BPI fold containing family A member 1	BPI fold-containing family A member 1; ligand-binding protein RYA3; lung-specific protein X; nasopharyngeal carcinoma-related protein; palate lung and nasal epithelium clone protein; palate, lung and nasal epithelium associated; protein Plunc; secretory protein in upper respiratory tracts; short PLUNC1; tracheal epithelium enriched protein; von Ebner protein Hl
BPIFA2	BPIFA2	BPI fold containing family A member 2	BPI fold-containing family A member 2; parotid secretory protein; short palate, lung and nasal epithelium carcinoma-associated protein 2
BPIFA3	BPIFA3	BPI fold containing family A member 3	BPI fold-containing family A member 3; short long palate, lung and nasal epithelium carcinoma associated 3
BPIFB1	BPIFB1	BPI fold containing family B member 1	BPI fold-containing family B member 1; VEMSGP; long palate, lung and nasal epithelium carcinoma associated 1; long palate, lung and nasal epithelium carcinoma-associated protein 1; von Ebner minor salivary gland protein
BPIFB2	BPIFB2	BPI fold containing family B member 2	BPI fold-containing family B member 2; BPI-like 1; bactericidal/permeability-increasing protein-like 1; long palate, lung and nasal epithelium carcinoma-associated protein 2
BPIFB3	BPIFB3	BPI fold containing family B member 3	BPI fold-containing family B member 3; ligand-binding protein RYA3; long palate, lung and nasal epithelium carcinoma-associated protein 3
BPIFB4	BPIFB4	BPI fold containing family B member 4	BPI fold-containing family B member 4; ligand-binding protein RY2G5; likely ortholog of rat probable ligand-binding protein RY2G5; long palate, lung and nasal epithelium carcinoma associated 4; long palate, lung and nasal epithelium carcinoma-associated protein 4
BPIFB6	BPIFB6	BPI fold containing family B member 6	BPI fold-containing family B member 6; bactericidal/permeability-increasing protein-like 3
BPIFC	BPIFC	BPI fold containing family C	BPI fold-containing family C protein; BPI-like 2; bactericidal/permeability-increasing protein-like 2
BPNT1	BPNT1	3'(2'), 5'-bisphosphate nucleotidase 1	3'(2'),5'-bisphosphate nucleotidase 1; 3'-phosphoadenosine 5'-phosphate phosphatase; BPntase; BPntase 1; PAP phosphatase; PAP-inositol-1,4-phosphatase; bisphosphate 3'-nucleotidase 1; epididymis luminal protein 20; inositol-polyphosphate 1-phosphatase; testicular tissue protein Li 29
BPNT2	BPNT2	3'(2'), 5'-bisphosphate nucleotidase 2	Golgi 3-prime phosphoadenosine 5-prime phosphate 3-prime phosphatase; Golgi-resident adenosine 3',5'-bisphosphate 3'-phosphatase; IMPase 3; golgi-resident PAP phosphatase; golgi-resident nucleotide phosphatase; inositol monophosphatase domain containing 1; inositol monophosphatase domain-containing protein 1; inositol-1(or 4)-monophosphatase 3; myo-inositol monophosphatase A3; phosphoadenosine ph…
BPTF	BPTF	bromodomain PHD finger transcription factor	bromodomain and PHD domain transcription factor; bromodomain and PHD finger-containing transcription factor; fetal Alz-50 clone 1 protein; fetal Alz-50 reactive clone 1; fetal Alzheimer antigen; nucleosome remodeling factor, large subunit; nucleosome-remodeling factor subunit BPTF
BPY2	BPY2 | BPY2B | BPY2C	basic charge Y-linked 2 | basic charge Y-linked 2B | basic charge Y-linked 2C	basic protein on Y chromosome 2; testis-specific basic protein Y 2; testis-specific basic protein on Y, 2; variable charge, Y-linked, 2; variably charged protein Y 2 | basic charge, Y-linked 2; basic protein on Y chromosome 2; testis-specific basic protein Y 2; variable charge, Y-linked, 2; variably charged protein Y 2 | basic charge, Y-linked 2; basic protein on Y chromosome 2; testis-specific b…
BRAF	BRAF	B-Raf proto-oncogene, serine/threonine kinase	94 kDa B-raf protein; B-Raf proto-oncogene serine/threonine-protein kinase (p94); B-Raf serine/threonine-protein; murine sarcoma viral (v-raf) oncogene homolog B1; proto-oncogene B-Raf; serine/threonine-protein kinase B-raf; v-raf murine sarcoma viral oncogene homolog B; v-raf murine sarcoma viral oncogene homolog B1
BRAP	BRAP	BRCA1 associated protein	BRCA1-associated protein; RING finger protein 52; RING-type E3 ubiquitin transferase BRAP2; galectin-2-binding protein; impedes mitogenic signal propagation; renal carcinoma antigen NY-REN-63
BRAT1	BRAT1	BRCA1 associated ATM activator 1	BRCA1-associated ATM activator 1; BRCA1-associated protein required for ATM activation protein 1; HEAT repeat-containing protein C7orf27
BRCA1	BRCA1	BRCA1 DNA repair associated	BRCA1/BRCA2-containing complex, subunit 1; Fanconi anemia, complementation group S; RING finger protein 53; breast and ovarian cancer susceptibility protein 1; breast cancer 1, early onset; breast cancer type 1 susceptibility protein; early onset breast cancer 1; protein phosphatase 1, regulatory subunit 53
BRCA2	BRCA2	BRCA2 DNA repair associated	BRCA1/BRCA2-containing complex, subunit 2; BRCA2 DNA repair associated protein; DNA repair-associated BRCA2; Fanconi anemia group D1 protein; breast and ovarian cancer susceptibility gene, early onset; breast and ovarian cancer susceptibility protein 2; breast cancer 2 tumor suppressor; breast cancer 2, early onset; breast cancer type 2 susceptibility protein; mutant BRCA2; mutant DNA repair-asso…
BRCC3	BRCC3	BRCA1/BRCA2-containing complex subunit 3	BRCA1-A complex subunit BRCC36; BRCA1/BRCA2-containing complex subunit 36; BRISC complex subunit BRCC36; lys-63-specific deubiquitinase BRCC36
BRD1	BRD1	bromodomain containing 1	BR140-like protein; bromodomain and PHD finger-containing protein 2; bromodomain-containing protein 1
BRD10	BRD10	bromodomain containing 10	uncharacterized bromodomain-containing protein 10
BRD2	BRD2	bromodomain containing 2	BRD2 intronic transcript 1; bromodomain-containing protein 2; female sterile homeotic-related gene 1; really interesting new gene 3 protein
BRD3	BRD3	bromodomain containing 3	RING3-like protein; bromodomain-containing protein 3; female sterile homeotic related gene 2
BRD3OS	BRD3OS	BRD3 opposite strand	BRD3 opposite strand protein; Super enhancer and ERK1/2 Regulated Long Intergenic non-protein coding transcript Overexpressed in Carcinomas; long intergenic non-protein coding RNA 94; putative uncharacterized protein BRD3OS
BRD4	BRD4	bromodomain containing 4	bromodomain-containing protein 4; chromosome-associated protein; female sterile homeotic related gene 4; mitotic chromosome-associated protein
BRD7	BRD7	bromodomain containing 7	75 kDa bromodomain protein; bromodomain-containing protein 7; protein CELTIX-1
BRD8	BRD8	bromodomain containing 8	bromodomain-containing protein 8; skeletal muscle abundant protein 2; thyroid hormone receptor coactivating protein of 120 kDa; trCP120
BRD9	BRD9	bromodomain containing 9	bromodomain-containing protein 9; rhabdomyosarcoma antigen MU-RMS-40.8; sarcoma antigen NY-SAR-29
BRDT	BRDT	bromodomain testis associated	RING3-like protein; bromodomain testis-specific protein; bromodomain, testis-specific; cancer/testis antigen 9
BRF1	BRF1	BRF1 general transcription factor IIIB subunit	B - related factor 1; BRF1 RNA polymerase III transcription initiation factor subunit; BRF1 homolog, subunit of RNA polymerase III transcription initiation factor IIIB; BRF1, RNA polymerase III transcription initiation factor 90 kDa subunit; TATA box binding protein (TBP)-associated factor 3C; TATA box binding protein (TBP)-associated factor, RNA polymerase III, GTF3B subunit 2; TBP - associated …
BRF2	BRF2	BRF2 general transcription factor IIIB subunit	B-related factor 2; BRF-2; BRF2 RNA polymerase III transcription initiation factor subunit; BRF2, RNA polymerase III transcription initiation factor 50 kDa subunit; BRF2, subunit of RNA polymerase III transcription initiation factor, BRF1-like; RNA polymerase III transcription initiation factor BRFU; hBRFU; hTFIIIB50; transcription factor IIB- related factor, TFIIIB50; transcription factor IIIB 5…
BRI3	BRI3	brain protein I3	membrane protein BRI3; pRGR2
BRI3BP	BRI3BP	BRI3 binding protein	BRI3-binding protein; I3-binding protein; cervical cancer 1 proto-oncogene-binding protein KG19; cervical cancer oncogene binding protein
BRICD5	BRICD5	BRICHOS domain containing 5	BRICHOS domain-containing protein 5; BRICHOS domain-containing protein C16orf79
BRINP1	BRINP1	BMP/retinoic acid inducible neural specific 1	BMP/retinoic acid-inducible neural-specific protein 1; bA574M5.1 (deleted in bladder cancer chromosome region candidate 1 (IB3089A)); bone morphogenetic protein/retinoic acid inducible neural-specific 1; bone morphogenic protein/retinoic acid inducible neural-specific 1; deleted in bladder cancer 1; deleted in bladder cancer chromosome region candidate 1; deleted in bladder cancer protein 1
BRINP2	BRINP2	BMP/retinoic acid inducible neural specific 2	BMP/retinoic acid-inducible neural-specific protein 2; DBCCR1-like protein 2; DBCCR1-like2; bone morphogenetic protein/retinoic acid inducible neural-specific 2; bone morphogenic protein/retinoic acid inducible neural-specific 2; family with sequence similarity 5, member B; protein FAM5B
BRINP3	BRINP3	BMP/retinoic acid inducible neural specific 3	BMP/retinoic acid-inducible neural-specific protein 3; DBCCR1-like protein 1; bone morphogenetic protein/retinoic acid inducible neural-specific 3; family with sequence similarity 5, member C; protein FAM5C
BRIP1	BRIP1	BRCA1 interacting DNA helicase 1	ATP-dependent RNA helicase BRIP1; BRCA1 interacting helicase 1; BRCA1 interacting protein C-terminal helicase 1; BRCA1-associated C-terminal helicase 1; BRCA1-binding helicase-like protein BACH1; BRCA1/BRCA2-associated helicase 1; DNA 5'-3' helicase FANCJ; FANCJ helicase; Fanconi anemia group J protein
BRIX1	BRIX1	biogenesis of ribosomes BRX1	BRX1, biogenesis of ribosomes, homolog; brix domain containing 2; brix domain-containing protein 2; ribosome biogenesis protein BRX1 homolog
BRK1	BRK1	BRICK1 subunit of SCAR/WAVE actin nucleating complex	BRICK1, SCAR/WAVE actin nucleating complex subunit; haematopoietic stem/progenitor cell protein 300; protein BRICK1
BRME1	BRME1	break repair meiotic recombinase recruitment factor 1	BRCA2 and MEILB2-associating protein 1; break repair meiotic recombinase recruitment factor 1; meiosis-specific 4930432K21RIK; pre-T/NK cell associated protein (3B3); uncharacterized protein C19orf57
BRMS1	BRMS1	BRMS1 transcriptional repressor and anoikis regulator	breast cancer metastasis suppressor 1; breast cancer metastasis-suppressor 1
BRMS1L	BRMS1L	BRMS1 like transcriptional repressor	BRMS1-homolog protein p40; BRMS1-like protein p40; breast cancer metastasis-suppressor 1 like; breast cancer metastasis-suppressor 1-like protein
BROX	BROX	BRO1 domain and CAAX motif containing	BRO1 domain-containing protein BROX
BRPF1	BRPF1	bromodomain and PHD finger containing 1	bromodomain-containing protein, 140kD; peregrin
BRPF3	BRPF3	bromodomain and PHD finger containing 3	bromodomain and PHD finger-containing protein 3
BRS3	BRS3	bombesin receptor subtype 3	BRS-3; G-protein coupled receptor; bombesin like receptor 3; bombesin receptor subtype-3
BRSK1	BRSK1	BR serine/threonine kinase 1	BR serine/threonine-protein kinase 1; SAD1 homolog; SAD1 kinase; brain-selective kinase 1; brain-specific serine/threonine-protein kinase 1; protein kinase SAD1A; serine/threonine-protein kinase BRSK1; serine/threonine-protein kinase SAD-B; synapses of Amphids Defective homolog 1
BRSK2	BRSK2	BR serine/threonine kinase 2	BR serine/threonine-protein kinase 2; brain-selective kinase 2; brain-specific serine/threonine-protein kinase 2; protein kinase SAD1B; serine/threonine-protein kinase 29; serine/threonine-protein kinase BRSK2; serine/threonine-protein kinase SAD-A; testicular tissue protein Li 30
BRWD1	BRWD1	bromodomain and WD repeat domain containing 1	WD repeat protein WDR9-form2; WD repeat-containing protein 9; bromodomain and WD repeat-containing protein 1; transcriptional unit N143
BRWD3	BRWD3	bromodomain and WD repeat domain containing 3	bromo domain-containing protein disrupted in leukemia; bromodomain and WD repeat-containing protein 3; novel WD repeat domain protein
BSCL2	BSCL2 | HNRNPUL2-BSCL2	BSCL2 lipid droplet biogenesis associated, seipin | HNRNPUL2-BSCL2 readthrough (NMD candidate)	BSCL2, seipin lipid droplet biogenesis associated; Berardinelli-Seip congenital lipodystrophy 2 (seipin); Bernardinelli-Seip congenital lipodystrophy type 2 protein; seipin |
BSDC1	BSDC1	BSD domain containing 1	BSD domain-containing protein 1
BSG	BSG	basigin (Ok blood group)	OK blood group antigen; basigin; collagenase stimulatory factor; extracellular matrix metalloproteinase inducer; hepatoma-associated antigen; leukocyte activation antigen M6; tumor cell-derived collagenase stimulatory factor
BSN	BSN	bassoon presynaptic cytomatrix protein	neuronal double zinc finger protein; protein bassoon; zinc finger protein 231
BSND	BSND	barttin CLCNK type accessory subunit beta	Bartter syndrome, infantile, with sensorineural deafness (Barttin); barttin; barttin CLCNK type accessory beta subunit; barttin CLCNK-type chloride channel accessory beta subunit; deafness, autosomal recessive 73
BSPH1	BSPH1	binder of sperm protein homolog 1	binder of sperm 1; binder of sperm protein homolog 1; bovine seminal plasma protein homolog 1; bovine seminal plasma protein-like 1; epididymal sperm binding protein 2
BSPRY	BSPRY	B-box and SPRY domain containing	B box and SPRY domain-containing protein; B-box and SPRY-domain containing protein; zetin 1
BST1	BST1	bone marrow stromal cell antigen 1	ADP-ribosyl cyclase 2; ADP-ribosyl cyclase/cyclic ADP-ribose hydrolase 2; NAD(+) nucleosidase; bone marrow stromal antigen 1; cADPr hydrolase 2; cyclic ADP-ribose hydrolase 2
BST2	BST2	bone marrow stromal cell antigen 2	BST-2; HM1.24 antigen; NPC-A-7; antiviral factor tetherin; bone marrow stromal antigen 2
BSX	BSX	brain specific homeobox	brain-specific homeobox protein homolog
BTAF1	BTAF1	B-TFIID TATA-box binding protein associated factor 1	ATP-dependent helicase BTAF1; B-TFIID transcription factor-associated 170 kDa subunit; BTAF1 RNA polymerase II, B-TFIID transcription factor-associated, 170kDa (Mot1 homolog, S. cerevisiae); Mot1 homolog; TATA-binding protein-associated factor 172; TBP-associated factor 172
BTBD1	BTBD1	BTB domain containing 1	BTB (POZ) domain containing 1; BTB/POZ domain-containing protein 1; HCV NS5A-transactivated protein 8; hepatitis C virus NS5A-transactivated protein 8
BTBD10	BTBD10	BTB domain containing 10	BTB (POZ) domain containing 10; BTB (broad-complex tramtrack and bric-a-brac/pox virus and zinc finger) domain-containing protein 10; BTB/POZ domain-containing protein 10; K+ channel tetramerization protein; epididymis secretory sperm binding protein; glucose metabolism-related protein 1
BTBD16	BTBD16	BTB domain containing 16	BTB/POZ domain-containing protein 16
BTBD17	BTBD17	BTB domain containing 17	BTB (POZ) domain containing 17; BTB/POZ and BACK domain-containing protein LOC388419; BTB/POZ domain-containing protein 17; transport and golgi organization 10 homolog A
BTBD18	BTBD18	BTB domain containing 18	BTB (POZ) domain containing 18; BTB/POZ domain-containing protein 18; hCG1730474
BTBD19	BTBD19	BTB domain containing 19	BTB (POZ) domain containing 19; BTB/POZ domain-containing protein 19; novel BTB domain containing protein
BTBD2	BTBD2	BTB domain containing 2	BTB (POZ) domain containing 2; BTB/POZ domain-containing protein 2
BTBD3	BTBD3	BTB domain containing 3	BTB (POZ) domain containing 3; BTB/POZ domain-containing protein 3
BTBD6	BTBD6	BTB domain containing 6	BTB (POZ) domain containing 6; BTB domain protein BDPL; BTB/POZ domain-containing protein 6; epididymis secretory sperm binding protein; glucocorticoid receptor AF-1 coactivator-1; lens BTB domain protein
BTBD7	BTBD7	BTB domain containing 7	BTB (POZ) domain containing 7; BTB/POZ domain-containing protein 7
BTBD8	BTBD8	BTB domain containing 8	AP2-interacting clathrin-endocytosis protein; APache; BTB (POZ) domain containing 8; BTB domain protein; BTB/POZ domain-containing protein 8; double BTB/POZ domain containing protein
BTBD9	BTBD9	BTB domain containing 9	BTB (POZ) domain containing 9; BTB/POZ domain-containing protein 9
BTC	BTC	betacellulin	probetacellulin
BTD	BTD	biotinidase	biocytinase; biotinase; biotinidase
BTF3	BTF3	basic transcription factor 3	NAC-beta; RNA polymerase B transcription factor 3; nascent polypeptide-associated complex subunit beta; nascent-polypeptide-associated complex beta polypeptide; transcription factor BTF3
BTF3L4	BTF3L4	basic transcription factor 3 like 4	transcription factor BTF3 homolog 4
BTG1	BTG1	BTG anti-proliferation factor 1	B-cell translocation gene 1 protein; B-cell translocation gene 1, anti-proliferative; protein BTG1
BTG2	BTG2	BTG anti-proliferation factor 2	B-cell translocation gene 2; BTG family member 2; NGF-inducible anti-proliferative protein PC3; nerve growth factor-inducible anti-proliferative; pheochromacytoma cell-3; protein BTG2
BTG3	BTG3	BTG anti-proliferation factor 3	B-cell translocation gene 3; BTG family member 3; abundant in neuroepithelium area protein; protein BTG3; protein Tob5
BTG4	BTG4	BTG anti-proliferation factor 4	B-cell translocation gene 4; BTG family member 4; protein BTG4; protein PC3b
BTK	BTK	Bruton tyrosine kinase	B-cell progenitor kinase; Bruton agammaglobulinemia tyrosine kinase; Bruton's tyrosine kinase; agammaglobulinaemia tyrosine kinase; dominant-negative kinase-deficient Brutons tyrosine kinase; tyrosine-protein kinase BTK
BTLA	BTLA	B and T lymphocyte associated	B- and T-lymphocyte attenuator; B- and T-lymphocyte-associated protein
BTN1A1	BTN1A1	butyrophilin subfamily 1 member A1	bK14H9.2 (butyrophilin, subfamily 1, member A1); butyrophilin subfamily 1 member A1
BTN2A1	BTN2A1	butyrophilin subfamily 2 member A1	butyrophilin subfamily 2 member A1
BTN2A2	BTN2A2	butyrophilin subfamily 2 member A2	butyrophilin 2; butyrophilin subfamily 2 member A2
BTN3A1	BTN3A1	butyrophilin subfamily 3 member A1	butyrophilin subfamily 3 member A1; dJ45P21.3 (butyrophilin, subfamily 3, member A1)
BTN3A2	BTN3A2	butyrophilin subfamily 3 member A2	butyrophilin protein; butyrophilin subfamily 3 member A2
BTN3A3	BTN3A3	butyrophilin subfamily 3 member A3	butyrophilin 3; butyrophilin subfamily 3 member A3
BTNL2	BTNL2	butyrophilin like 2	butyrophilin-like 2 (MHC class II associated); butyrophilin-like protein 2
BTNL3	BTNL3	butyrophilin like 3	butyrophilin-like protein 3; butyrophilin-like receptor
BTNL8	BTNL8	butyrophilin like 8	B7-H5 costimulatory molecule; butyrophilin-like protein 8
BTNL9	BTNL9	butyrophilin like 9	butyrophilin 3; butyrophilin-like protein 9
BTRC	BTRC	beta-transducin repeat containing E3 ubiquitin protein ligase	E3RSIkappaB; F-box and WD repeats protein beta-TrCP; F-box and WD-repeat protein 1B; F-box/WD repeat-containing protein 1A; beta-TrCP1; epididymis tissue protein Li 2a; pIkappaBalpha-E3 receptor subunit
BUB1	BUB1	BUB1 mitotic checkpoint serine/threonine kinase	BUB1 budding uninhibited by benzimidazoles 1 homolog; budding uninhibited by benzimidazoles 1 homolog; mitotic checkpoint serine/threonine-protein kinase BUB1; mitotic spindle checkpoint kinase; putative serine/threonine-protein kinase
BUB1B	BUB1B	BUB1 mitotic checkpoint serine/threonine kinase B	BUB1B, mitotic checkpoint serine/threonine kinase; MAD3/BUB1-related protein kinase; budding uninhibited by benzimidazoles 1 homolog beta; mitotic checkpoint kinase MAD3L; mitotic checkpoint serine/threonine-protein kinase BUB1 beta
BUB3	BUB3	BUB3 mitotic checkpoint protein	BUB3 budding uninhibited by benzimidazoles 3 homolog; budding uninhibited by benomyl; budding uninhibited by benzimidazoles 3 homolog; mitotic checkpoint component; mitotic checkpoint protein BUB3; testicular tissue protein Li 27
BUD13	BUD13	BUD13 homolog	BUD13 homolog; functional spliceosome-associated protein 71
BUD23	BUD23	BUD23 rRNA methyltransferase and ribosome maturation factor	18S rRNA (guanine-N(7))-methyltransferase; Williams-Beuren candidate region putative methyltransferase; Williams-Beuren syndrome chromosomal region 22 protein; Williams-Beuren syndrome chromosome region 22; bud site selection protein 23 homolog; metastasis-related methyltransferase 1; probable 18S rRNA (guanine-N(7))-methyltransferase; rRNA methyltransferase and ribosome maturation factor; riboso…
BUD31	BUD31	BUD31 homolog	G10 maternal transcript homolog; functional spliceosome-associated protein 17; maternal G10 transcript; protein BUD31 homolog; protein EDG-2; protein G10 homolog
BVES	BVES
BYSL	BYSL	bystin like	by the ribosomal protein s6 gene, drosophila, homolog-like; bystin
BZW1	BZW1	basic leucine zipper and W2 domains 1	basic leucine zipper and W2 domain-containing protein 1; basic leucine-zipper protein BZAP45; eIF5-mimic protein 2; putative protein product of Nbla10236
BZW2	BZW2	basic leucine zipper and W2 domains 2	basic leucine zipper and W2 domain-containing protein 2; eIF5-mimic protein 1
C10orf105	C10orf105	chromosome 10 open reading frame 105	uncharacterized protein C10orf105
C10orf120	C10orf120	chromosome 10 open reading frame 120	uncharacterized protein C10orf120
C10orf126	C10orf126	chromosome 10 open reading frame 126
C10orf143	C10orf143	chromosome 10 open reading frame 143	long intergenic non-protein coding RNA 959; uncharacterized protein C10orf143
C10orf53	C10orf53	chromosome 10 open reading frame 53	UPF0728 protein C10orf53
C10orf62	C10orf62	chromosome 10 open reading frame 62	uncharacterized protein C10orf62
C10orf67	C10orf67	chromosome 10 open reading frame 67	long intergenic non-protein coding RNA 1552; uncharacterized protein C10orf67, mitochondrial
C10orf71	C10orf71	chromosome 10 open reading frame 71	cardiac enriched FHL2-interacting protein; cardiac-enriched FHL2-interacting protein; uncharacterized protein C10orf71
C10orf88	C10orf88	chromosome 10 open reading frame 88	ATPase PAAT; protein associated with ABC transporters; uncharacterized protein C10orf88
C10orf90	C10orf90	chromosome 10 open reading frame 90	(E2-independent) E3 ubiquitin-conjugating enzyme FATS; E2/E3 hybrid ubiquitin-protein ligase FATS; centrosomal protein C10orf90; fragile-site associated tumor suppressor homolog
C10orf95	C10orf95	chromosome 10 open reading frame 95	uncharacterized protein C10orf95
C11orf16	C11orf16	chromosome 11 open reading frame 16	uncharacterized protein C11orf16
C11orf21	C11orf21	chromosome 11 open reading frame 21	uncharacterized protein C11orf21
C11orf24	C11orf24	chromosome 11 open reading frame 24	uncharacterized protein C11orf24
C11orf42	C11orf42	chromosome 11 open reading frame 42	uncharacterized protein C11orf42
C11orf52	C11orf52 | HSPB2-C11orf52	chromosome 11 open reading frame 52 | HSPB2-C11orf52 readthrough (NMD candidate)	uncharacterized protein C11orf52 | HSPB2-C11orf52 readthrough (non-protein coding); Uncharacterized protein C11orf52
C11orf54	C11orf54	chromosome 11 open reading frame 54	epididymis secretory sperm binding protein; ester hydrolase C11orf54
C11orf58	C11orf58	chromosome 11 open reading frame 58	small acidic protein
C11orf65	C11orf65	chromosome 11 open reading frame 65	mitochondrial fission factor interactor; protein MFI; uncharacterized protein C11orf65
C11orf68	C11orf68	chromosome 11 open reading frame 68	UPF0696 protein C11orf68; basophilic leukemia expressed protein BLES03; basophilic leukemia-expressed protein Bles03; protein p5326
C11orf71	C11orf71	chromosome 11 open reading frame 71	uncharacterized protein C11orf71; up-regulated in lung cancer 7
C11orf86	C11orf86	chromosome 11 open reading frame 86	fasting and CREB-H induced; uncharacterized protein C11orf86
C11orf87	C11orf87	chromosome 11 open reading frame 87	neuronal integral membrane protein 1; uncharacterized protein C11orf87
C11orf91	C11orf91	chromosome 11 open reading frame 91	uncharacterized protein C11orf91
C11orf96	C11orf96	chromosome 11 open reading frame 96	protein Ag2 homolog; uncharacterized protein C11orf96
C11orf97	C11orf97	chromosome 11 open reading frame 97	long intergenic non-protein coding RNA 1171; uncharacterized protein C11orf97
C11orf98	C11orf98 | LBHD1	chromosome 11 open reading frame 98 | LBH domain containing 1	uncharacterized protein C11orf98 | LBH domain-containing protein 1
C12orf42	C12orf42	chromosome 12 open reading frame 42	uncharacterized protein C12orf42
C12orf43	C12orf43	chromosome 12 open reading frame 43	protein CUSTOS; uncharacterized protein C12orf43
C12orf50	C12orf50	chromosome 12 open reading frame 50	uncharacterized protein C12orf50
C12orf54	C12orf54	chromosome 12 open reading frame 54	uncharacterized protein C12orf54
C12orf56	C12orf56	chromosome 12 open reading frame 56	uncharacterized protein C12orf56
C12orf57	C12orf57	chromosome 12 open reading frame 57	gene rich cluster C10; likely ortholog of mouse gene rich cluster, C10; protein C10
C12orf60	C12orf60	chromosome 12 open reading frame 60	uncharacterized protein C12orf60
C12orf71	C12orf71	chromosome 12 open reading frame 71	uncharacterized protein C12orf71
C12orf75	C12orf75	chromosome 12 open reading frame 75	adipogenesis down-regulated 3; overexpressed in colon carcinoma 1 protein; overexpressed in colon carcinoma-1
C12orf76	C12orf76	chromosome 12 open reading frame 76	uncharacterized protein C12orf76
C13orf42	C13orf42	chromosome 13 open reading frame 42	long intergenic non-protein coding RNA 371; long intergenic non-protein coding RNA 372; uncharacterized protein C13orf42
C13orf46	C13orf46	chromosome 13 open reading frame 46	uncharacterized protein C13orf46
C14orf119	C14orf119	chromosome 14 open reading frame 119	My028 protein; uncharacterized protein C14orf119
C14orf132	C14orf132	chromosome 14 open reading frame 132	uncharacterized protein C14orf132
C14orf178	C14orf178
C14orf180	C14orf180	chromosome 14 open reading frame 180	nutritionally-regulated adipose and cardiac enriched protein homolog; transmembrane protein C14orf180
C14orf28	C14orf28
C14orf39	C14orf39	chromosome 14 open reading frame 39	protein SIX6OS1; six6 opposite strand transcript 1
C14orf93	C14orf93	chromosome 14 open reading frame 93	regulator of thyroid function and cancer; uncharacterized protein C14orf93
C15orf39	C15orf39	chromosome 15 open reading frame 39	uncharacterized protein C15orf39
C15orf40	C15orf40	chromosome 15 open reading frame 40	UPF0235 protein C15orf40
C15orf48	C15orf48	chromosome 15 open reading frame 48	MIR147B host; cytochrome c oxidase subunit FA4 like 3; mitochondrial stress response antiviral; modulator of cytochrome C oxidase during inflammation; normal mucosa of esophagus specific 1; normal mucosa of esophagus-specific gene 1 protein
C15orf61	C15orf61	chromosome 15 open reading frame 61	uncharacterized protein C15orf61
C15orf62	C15orf62	chromosome 15 open reading frame 62	uncharacterized protein C15orf62, mitochondrial
C16orf46	C16orf46	chromosome 16 open reading frame 46	uncharacterized protein C16orf46
C16orf54	C16orf54	chromosome 16 open reading frame 54	Surface Antigen In Leukemia; transmembrane protein C16orf54
C16orf74	C16orf74	chromosome 16 open reading frame 74	adipose-secreted regulator of appetite; hypothetical protein 1; hypothetical protein 2; hypothetical protein 3; uncharacterized protein C16orf74
C16orf78	C16orf78	chromosome 16 open reading frame 78	uncharacterized protein C16orf78
C16orf82	C16orf82	chromosome 16 open reading frame 82	protein TNT
C16orf86	C16orf86	chromosome 16 open reading frame 86	uncharacterized protein C16orf86
C16orf87	C16orf87	chromosome 16 open reading frame 87	UPF0547 protein C16orf87
C16orf89	C16orf89	chromosome 16 open reading frame 89	UPF0764 protein C16orf89
C16orf90	C16orf90	chromosome 16 open reading frame 90	uncharacterized protein C16orf90
C16orf92	C16orf92	chromosome 16 open reading frame 92	fertilization-influencing membrane protein; uncharacterized protein C16orf92
C16orf95	C16orf95	chromosome 16 open reading frame 95	uncharacterized protein C16orf95
C16orf96	C16orf96	chromosome 16 open reading frame 96	uncharacterized protein C16orf96
C17orf100	C17orf100	chromosome 17 open reading frame 100	hCG1985469; uncharacterized protein C17orf100
C17orf107	C17orf107	chromosome 17 open reading frame 107	uncharacterized protein C17orf107
C17orf113	C17orf113	chromosome 17 open reading frame 113	transmembrane protein C17orf113; uncharacterized protein C17orf113
C17orf114	C17orf114	chromosome 17 open reading frame 114	uncharacterized protein C17orf114
C17orf49	C17orf49 | RNASEK-C17orf49	| RNASEK-C17orf49 readthrough	| BPTF-associated protein of 18 kDa; Chromatin complexes subunit BAP18; RNASEK-C17orf49 readthrough (non-protein coding)
C17orf50	C17orf50	chromosome 17 open reading frame 50	uncharacterized protein C17orf50
C17orf58	C17orf58	chromosome 17 open reading frame 58	UPF0450 protein C17orf58
C17orf67	C17orf67	chromosome 17 open reading frame 67	uncharacterized protein C17orf67
C17orf75	C17orf75	chromosome 17 open reading frame 75	protein Njmu-R1; sensitization to ricin complex subunit 2; spermatogenesis-related protein
C17orf78	C17orf78	chromosome 17 open reading frame 78	famsin; uncharacterized protein C17orf78
C17orf99	C17orf99	chromosome 17 open reading frame 99	GLPG464; interleukin-40; protein IL-40; uncharacterized protein C17orf99
C18orf21	C18orf21	chromosome 18 open reading frame 21	HBV X-transactivated gene 13 protein; HBV X-transactivated protein 13; HBV XAg-transactivated protein 13; UPF0711 protein C18orf21
C18orf32	C18orf32	chromosome 18 open reading frame 32	UPF0729 protein C18orf32; putative NF-kappa-B-activating protein 200; putative NFkB activating protein
C18orf54	C18orf54	chromosome 18 open reading frame 54	lung adenoma susceptibility protein 2
C18orf63	C18orf63	chromosome 18 open reading frame 63	uncharacterized protein C18orf63
C19orf12	C19orf12	chromosome 19 open reading frame 12	membrane protein-associated neurodegeneration; neurodegeneration with brain iron accumulation 3; protein C19orf12
C19orf18	C19orf18	chromosome 19 open reading frame 18	uncharacterized protein C19orf18
C19orf25	C19orf25	chromosome 19 open reading frame 25	UPF0449 protein C19orf25
C19orf33	C19orf33	chromosome 19 open reading frame 33	HAI-2 related small protein; hepatocyte growth factor activator inhibitor type 2-related small protein; immortalization up-regulated protein; immortalization-upregulated protein
C19orf38	C19orf38	chromosome 19 open reading frame 38	Highly expressed in immature dendritic cell transcript 1; protein HIDE1
C19orf44	C19orf44	chromosome 19 open reading frame 44	uncharacterized protein C19orf44
C19orf47	C19orf47	chromosome 19 open reading frame 47	uncharacterized protein C19orf47
C19orf53	C19orf53	chromosome 19 open reading frame 53	leydig cell tumor 10 kDa protein homolog
C19orf67	C19orf67	chromosome 19 open reading frame 67	UPF0575 protein C19orf67
C19orf73	C19orf73	chromosome 19 open reading frame 73	putative uncharacterized protein C19orf73
C19orf81	C19orf81	chromosome 19 open reading frame 81	putative uncharacterized protein C19orf81
C19orf84	C19orf84	chromosome 19 open reading frame 84	uncharacterized protein C19orf84
C19orf85	C19orf85	chromosome 19 open reading frame 85	uncharacterized protein C19orf85
C1D	C1D	C1D nuclear receptor corepressor	C1D DNA-binding protein; C1D nuclear receptor co-repressor; nuclear DNA-binding protein; nuclear nucleic acid-binding protein C1D; small unique nuclear receptor co-repressor; small unique nuclear receptor corepressor
C1GALT1	C1GALT1	core 1 synthase, glycoprotein-N-acetylgalactosamine 3-beta-galactosyltransferase 1	B3Gal-T8; core 1 O-glycan T-synthase; core 1 UDP-galactose:N-acetylgalactosamine-alpha-R beta 1,3-galactosyltransferase 1; core 1 beta3-Gal-T1; epididymis secretory sperm binding protein; glycoprotein-N-acetylgalactosamine 3-beta-galactosyltransferase 1
C1GALT1C1	C1GALT1C1	C1GALT1 specific chaperone 1	C1GALT1-specific chaperone 1; C38H2-like protein 1; beta 1,3-galactosyltransferase 2; core 1 beta1,3-galactosyltransferase 2; core 1 beta3-Gal-T-specific molecular chaperone; core 1 beta3-Gal-T2; core 1 beta3-galactosyltransferase-specific molecular chaperone
C1GALT1C1L	C1GALT1C1L	C1GALT1 specific chaperone 1 like	C1GALT1-specific chaperone 1-like protein
C1orf105	C1orf105	chromosome 1 open reading frame 105	uncharacterized protein C1orf105
C1orf115	C1orf115	chromosome 1 open reading frame 115	Required for Drug-induced Death 1; required for drug-induced death protein 1; uncharacterized protein C1orf115
C1orf116	C1orf116	chromosome 1 open reading frame 116	specifically androgen-regulated gene protein; specifically androgen-regulated protein
C1orf122	C1orf122	chromosome 1 open reading frame 122	uncharacterized protein C1orf122
C1orf127	C1orf127
C1orf131	C1orf131
C1orf141	C1orf141	chromosome 1 open reading frame 141	uncharacterized protein C1orf141
C1orf146	C1orf146	chromosome 1 open reading frame 146	protein SPO16 homolog; synaptonemal complex reinforcing element; uncharacterized protein C1orf146
C1orf159	C1orf159	chromosome 1 open reading frame 159	uncharacterized protein C1orf159
C1orf162	C1orf162	chromosome 1 open reading frame 162	transmembrane protein C1orf162
C1orf167	C1orf167	chromosome 1 open reading frame 167	uncharacterized protein C1orf167
C1orf174	C1orf174	chromosome 1 open reading frame 174	RP13-531C17.2; UPF0688 protein C1orf174
C1orf185	C1orf185	chromosome 1 open reading frame 185	uncharacterized protein C1orf185
C1orf198	C1orf198	chromosome 1 open reading frame 198	uncharacterized protein C1orf198
C1orf202	C1orf202	chromosome 1 open reading frame 202	uncharacterized protein C1orf202
C1orf21	C1orf21	chromosome 1 open reading frame 21	cell proliferation-inducing gene 13 protein; proliferation-inducing protein 13; uncharacterized protein C1orf21
C1orf210	C1orf210	chromosome 1 open reading frame 210	type III endosome membrane protein TEMP
C1orf216	C1orf216	chromosome 1 open reading frame 216	UPF0500 protein C1orf216
C1orf226	C1orf226	chromosome 1 open reading frame 226	uncharacterized protein C1orf226
C1orf232	C1orf232	chromosome 1 open reading frame 230	uncharacterized protein C1orf232
C1orf35	C1orf35	chromosome 1 open reading frame 35	multiple myeloma transforming 2; multiple myeloma tumor-associated protein 2
C1orf43	C1orf43	chromosome 1 open reading frame 43	HCV NS5A-transactivated protein 4; hepatitis C virus NS5A-transactivated protein 4; protein C1orf43; uncharacterized protein C1orf43
C1orf50	C1orf50	chromosome 1 open reading frame 50	uncharacterized protein C1orf50
C1orf52	C1orf52	chromosome 1 open reading frame 52	BCL10-associated gene protein; UPF0690 protein C1orf52
C1orf53	C1orf53	chromosome 1 open reading frame 53	uncharacterized protein C1orf53
C1orf54	C1orf54	chromosome 1 open reading frame 54	uncharacterized protein C1orf54
C1orf56	C1orf56	chromosome 1 open reading frame 56	methylated in normal thymocytes protein; protein MENT
C1orf74	C1orf74	chromosome 1 open reading frame 74	UPF0739 protein C1orf74; up-regulated in lung cancer 4
C1orf87	C1orf87	chromosome 1 open reading frame 87	carcinoma-related EF-hand protein; uncharacterized protein C1orf87
C1orf94	C1orf94	chromosome 1 open reading frame 94	uncharacterized protein C1orf94
C1QA	C1QA	complement C1q A chain	complement C1q chain A; complement C1q subcomponent subunit A; complement component 1, q subcomponent, A chain; complement component 1, q subcomponent, alpha polypeptide; complement component C1q, A chain
C1QB	C1QB	complement C1q B chain	complement C1q chain B; complement C1q subcomponent subunit B; complement component 1, q subcomponent, B chain; complement component 1, q subcomponent, beta polypeptide; complement component C1q, B chain; complement subcomponent C1q chain B
C1QBP	C1QBP	complement C1q binding protein	ASF/SF2-associated protein p32; C1q globular domain-binding protein; complement component 1 Q subcomponent-binding protein, mitochondrial; complement component 1, q subcomponent binding protein; glycoprotein gC1qBP; hyaluronan-binding protein 1; mitochondrial matrix protein p32; p33; splicing factor SF2-associated protein
C1QC	C1QC	complement C1q C chain	complement C1q subcomponent subunit C; complement component 1, q subcomponent, C chain; complement component 1, q subcomponent, gamma polypeptide
C1QL1	C1QL1	complement C1q like 1	C1q and tumor necrosis factor-related protein 14; C1q-related factor; C1q/TNF-related protein 14; complement component 1, q subcomponent-like 1
C1QL2	C1QL2	complement C1q like 2	C1q and tumor necrosis factor-related protein 10; C1q-domain containing protein; C1q/TNF-related protein 10; complement C1q-like protein 2; complement component 1, q subcomponent-like 2
C1QL3	C1QL3	complement C1q like 3	C1q and tumor necrosis factor-related protein 13; C1q/TNF-related protein 13; complement C1q-like protein 3; complement component 1, q subcomponent-like 3
C1QL4	C1QL4	complement C1q like 4	C1q and tumor necrosis factor-related protein 11; C1q/TNF-related protein 11; complement C1q-like protein 4; complement component 1, q subcomponent like 4
C1QTNF1	C1QTNF1	C1q and TNF related 1	C1q and tumor necrosis factor related protein 1; G protein coupled receptor interacting protein; complement C1q tumor necrosis factor-related protein 1; g protein-coupled receptor-interacting protein
C1QTNF12	C1QTNF12	C1q and TNF related 12	C1q and TNF related protein 12; C1q and tumor necrosis factor related protein 12; C1q domain containing 2; C1q/TNF-related protein 12; adipolin; adipose-derived insulin-sensitizing factor; complement C1q tumor necrosis factor-related protein 12; family with sequence similarity 132 member A; protein FAM132A
C1QTNF2	C1QTNF2	C1q and TNF related 2	C1q and tumor necrosis factor related protein 2; complement C1q tumor necrosis factor-related protein 2; complement-c1q tumor necrosis factor-related protein 2
C1QTNF3	C1QTNF3	C1q and TNF related 3	C1q and tumor necrosis factor related protein 3; cartonectin; collagenous repeat-containing sequence 26 kDa protein; collagenous repeat-containing sequence of 26-kDa; complement C1q tumor necrosis factor-related protein 3; secretory protein CORS26
C1QTNF4	C1QTNF4	C1q and TNF related 4	C1q and tumor necrosis factor related protein 4; C1q/TNF-related protein 4; complement C1q tumor necrosis factor-related protein 4; complement-c1q tumor necrosis factor-related protein 4
C1QTNF5	C1QTNF5 | MFRP	C1q and TNF related 5 | membrane frizzled-related protein	C1q TNF-alpha-related protein 5; C1q and tumor necrosis factor related protein 5; Membrane frizzled-related protein; complement C1q tumor necrosis factor-related protein 5; myonectin | C1q and TNF related 5; membrane frizzled-related protein; membrane-type frizzled-related protein
C1QTNF6	C1QTNF6	C1q and TNF related 6	C1q and tumor necrosis factor related protein 6; complement C1q tumor necrosis factor-related protein 6; complement-c1q tumor necrosis factor-related protein 6
C1QTNF7	C1QTNF7	C1q and TNF related 7	C1q and tumor necrosis factor related protein 7; complement C1q tumor necrosis factor-related protein 7; complement-c1q tumor necrosis factor-related protein 7
C1QTNF8	C1QTNF8	C1q and TNF related 8	C1q and tumor necrosis factor related protein 8; C1q/TNF-related protein 8; complement C1q tumor necrosis factor-related protein 8
C1QTNF9	C1QTNF9	C1q and TNF related 9	C1q and tumor necrosis factor related protein 9; complement C1q and tumor necrosis factor-related protein 9; complement C1q and tumor necrosis factor-related protein 9A; complement C1q tumor necrosis factor-related protein 9; complement C1q tumor necrosis factor-related protein 9A
C1QTNF9B	C1QTNF9B	C1q and TNF related 9B	C1q and tumor necrosis factor related protein 9B; C1q/TNF-related protein 9B; collagen triple helix repeat-containing; complement C1q and tumor necrosis factor-related protein 9B
C1R	C1R	complement C1r	complement C1r subcomponent; complement component 1, r subcomponent
C1RL	C1RL	complement C1r subcomponent like	C1r-like protein; C1r-like serine protease analog protein; complement C1r subcomponent-like protein; complement C1r-like proteinase; complement component 1, r subcomponent-like
C1S	C1S	complement C1s	C1 esterase; basic proline-rich peptide IB-1; complement C1s subcomponent; complement component 1 subcomponent s; complement component 1, s subcomponent
C2	C2	complement C2	C3/C5 convertase; complement C2; complement component 2; complement component C2
C20orf141	C20orf141	chromosome 20 open reading frame 141	uncharacterized protein C20orf141
C20orf144	C20orf144	chromosome 20 open reading frame 144	bcl-2-like protein from testis; bclt; uncharacterized protein C20orf144
C20orf173	C20orf173	chromosome 20 open reading frame 173	uncharacterized protein C20orf173
C20orf202	C20orf202	chromosome 20 open reading frame 202	uncharacterized protein C20orf202
C20orf203	C20orf203	chromosome 20 open reading frame 203	alugen; uncharacterized protein C20orf203
C20orf204	C20orf204	chromosome 20 open reading frame 204	long intergenic non-protein coding RNA 176; proline rich 17; putative proline-rich protein 17; uncharacterized protein C20orf204
C20orf96	C20orf96	chromosome 20 open reading frame 96	uncharacterized protein C20orf96
C21orf140	C21orf140 | LOC102723451	chromosome 21 open reading frame 140 | family with sequence similarity 243 member B	family with sequence similarity 243 member A; protein FAM243A; uncharacterized protein C21orf140 | protein FAM243B; uncharacterized protein C21orf140
C21orf58	C21orf58	chromosome 21 open reading frame 58	uncharacterized protein C21orf58
C21orf91	C21orf91	chromosome 21 open reading frame 91	cold sore susceptibility gene 1; early undifferentiated retina and lens; protein EURL homolog
C22orf15	C22orf15	chromosome 22 open reading frame 15	protein N27C7-3; uncharacterized protein C22orf15
C22orf23	C22orf23	chromosome 22 open reading frame 23	UPF0193 protein EVG1
C22orf31	C22orf31	chromosome 22 open reading frame 31	uncharacterized protein C22orf31
C22orf39	C22orf39	chromosome 22 open reading frame 39	Plasticity Associated Neural Transcript; UPF0545 protein C22orf39; synaptic plasticity regulator PANTS
C22orf42	C22orf42	chromosome 22 open reading frame 42	uncharacterized protein C22orf42
C2CD2	C2CD2	C2 calcium dependent domain containing 2	C2 domain-containing protein 2; TMEM24 related geme; transmembrane protein 24-like
C2CD2L	C2CD2L	C2CD2 like	C2 domain-containing protein 2-like; phospholipid transfer protein C2CD2L; transmembrane protein 24
C2CD3	C2CD3	C2 domain containing 3 centriole elongation regulator	C2 calcium dependent domain containing 3; C2 domain-containing protein 3
C2CD4A	C2CD4A	C2 calcium dependent domain containing 4A	C2 calcium-dependent domain-containing protein 4A; family with sequence similarity 148, member A; nuclear localized factor 1
C2CD4B	C2CD4B	C2 calcium dependent domain containing 4B	C2 calcium-dependent domain-containing protein 4B; family with sequence similarity 148, member B; nuclear localized factor 2
C2CD4C	C2CD4C	C2 calcium dependent domain containing 4C	C2 calcium-dependent domain-containing protein 4C; family with sequence similarity 148, member C; nuclear-localized factor 3
C2CD4D	C2CD4D	C2 calcium dependent domain containing 4D	C2 calcium-dependent domain-containing protein 4D; family with sequence similarity 148, member D
C2CD5	C2CD5	C2 calcium dependent domain containing 5	138 kDa C2 domain-containing phosphoprotein; C2 domain-containing protein 5
[truncated: 17,043 more rows]

## Sheet: Negative Controls
Display Name	Probe Name	Probe Sequence
Negative01	Negative01_1	TGGGTTACCCATACGATGGGACGGGAATACACTCACTGCAATCCGTCAAG
Negative01	Negative01_2	TGGAGGTATGGTCTTGGGCATACCCGATACATGCAACGCAGCTCGGGATG
Negative02	Negative02_1	GAGACGTGGATGATGATTGAGTAGCGGTGACGTCATGGATCTCGCTTAAT
Negative02	Negative02_2	AGCATATACCGGAGAGTTCGTCAATAGCCGCCCGTAGATGTCAATACTAG
[truncated: 96 more rows]
